# Supplementary material
Source: publisher figshare collection journal article supplement (https://acs.figshare.com/ndownloader/files/4169893)

## Supporting Information

### Dynamic Kinetic Resolution of $\alpha$ -Keto Esters via Asymmetric Transfer Hydrogenation

Kimberly M. Steward, Emily C. Gentry and Jeffrey S. Johnson

*Department of Chemistry, University of North Carolina at Chapel Hill, Chapel Hill, North Carolina 27599-3290*

[jsj@unc.edu](mailto:jsj@unc.edu)

| Table of Contents                                                                      | Page    |
|----------------------------------------------------------------------------------------|---------|
| General Information (Methods and Materials)                                            | S1-S2   |
| Procedures and Spectroscopic Data for $\beta$ -Aryl $\alpha$ -Keto Esters <b>1a-1j</b> | S3-S5   |
| Preparation of <i>m</i> -Terphenyl Sulfonyl Chloride <b>S1</b>                         | S6      |
| Preparation of <b>L8</b>                                                               | S6      |
| General Procedure for the Preparation of Racemic $\gamma$ -Butyrolactones <b>2a-2j</b> | S7      |
| General Procedures for the ATH-DKR of $\beta$ -Aryl $\alpha$ -Keto Esters              | S7      |
| Catalyst Optimization                                                                  | S8      |
| Procedures and Spectroscopic Data for $\gamma$ -Butyrolactones <b>2a-2j</b>            | S9-S12  |
| Large Scale Preparation of $\gamma$ -Butyrolactone <b>2g</b>                           | S12     |
| Preparation of $\gamma$ -Butyrolactone <b>3a</b>                                       | S12-S13 |
| Preparation of $\gamma$ -Butyrolactone <b>3b</b>                                       | S13     |
| Preparation of $\alpha$ -Methylene $\gamma$ -Butyrolactone <b>3c</b>                   | S13-S15 |
| $^1\text{H}$ , $^{13}\text{C}$ , NOESY NMR, and SFC/HPLC Data                          | S15-S53 |

### General Information

**Methods:** Infrared (IR) spectra were obtained using a Jasco 260 Plus Fourier transform infrared spectrometer. Proton and carbon magnetic resonance spectra ( $^1\text{H}$  NMR and  $^{13}\text{C}$  NMR) were recorded on a Bruker model DRX 400 or 600 ( $^1\text{H}$  NMR at 400 MHz or 600 MHz and  $^{13}\text{C}$  NMR at 100 MHz or 150 MHz) spectrometer with solvent resonance as the internal standard ( $^1\text{H}$  NMR:  $\text{CDCl}_3$  at 7.26 ppm and  $^{13}\text{C}$  NMR:  $\text{CDCl}_3$  at 77.0 ppm).  $^1\text{H}$  NMR data are reported as follows: chemical shift, multiplicity (s = singlet, bs = broad singlet, d = doublet, dd = doublet of doublet, t = triplet, q = quartet, sept = septuplet, oct = octuplet, m = multiplet), coupling constants (Hz), and integration. Supercritical fluid chromatography was performed on a Berger SFC system equipped with a Chiralcel WO column. Samples were eluted with SFC grade  $\text{CO}_2$  at the indicated percentage of MeOH. HPLC analysis was performed on an Agilent Technologies 1200 System equipped with Chiralpak IA, IB, and IC columns (constant flow at 1.00 mL/min). Optical rotations were measured using a 2 mL cell with a 1 dm path length on a Jasco DIP 1000 digital polarimeter. Mass spectra were obtained using a Micromass Quattro II (triple quad) instrument with nanoelectrospray ionization (Note: All samples prepared in methanol). Analytical thin layer chromatography (TLC) was performed on Whatman 0.25 mm silica gel 60 plates. Visualization was accomplished with UV light and/or aqueous ceric ammonium molybdate solution followed by heating. Purification of the reaction

products was carried out by using Siliaflash-P60 silica gel (40-63 $\mu$ m) purchased from Silicycle. All reactions were carried out under an atmosphere of nitrogen in flame-dried glassware with magnetic stirring. Yield refers to isolated yield of analytically pure material unless otherwise noted. Yields and diastereomeric ratios (dr) are reported for a specific experiment and as a result may differ slightly from those found in the tables, which are averages of at least two experiments.

**Materials:** Benzylidene malonates were prepared according to known procedures. Ethyl glyoxylate was purchased from Sigma Aldrich as a 40% solution in toluene and distilled under reduced pressure prior to use (the concentration after distillation was determined by  $^1\text{H}$  NMR). *N,N*-Dimethylformamide (DMF) was distilled from phosphorous pentoxide and stored under nitrogen over 3Å molecular sieves. Triethylamine ( $\text{NEt}_3$ ) was freshly distilled from calcium hydride prior to use. Toluene ( $\text{PhCH}_3$ ) and tetrahydrofuran (THF) were dried by passage through a column of neutral alumina under nitrogen prior to use. All other reagents were purchased from commercial sources and were used as received unless otherwise noted.

## General Procedure A for the Preparation of $\beta$ -Aryl $\alpha$ -Keto Esters 1a-1j

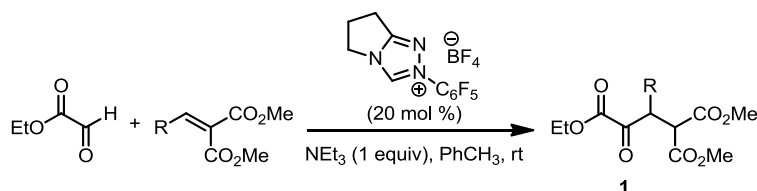

To a flame-dried 10-mL round-bottomed flask equipped with a magnetic stir bar were added benzylidene malonate (2.0 mmol, 1.0 equiv), ethyl glyoxylate (4.0 mmol, 2.0 equiv) and triazolium salt (0.40 mmol, 0.20 equiv). The flask was sealed with a rubber septum and purged with nitrogen. Toluene (0.5 M concentration with respect to benzylidene malonate) followed by triethylamine (2.0 mmol, 1.0 equiv) were then added. The reaction was stirred at room temperature for 16 h and diluted with ethyl acetate and water. The organic layer was washed with brine and dried over sodium sulfate. Concentration *in vacuo* afforded the  $\beta$ -aryl  $\alpha$ -keto esters which were purified by flash chromatography using the indicated solvent systems.

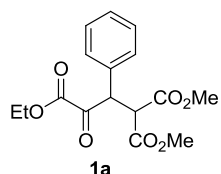

**3-Ethyl 1,1-dimethyl 3-oxo-2-phenylpropane-1,1,3-tricarboxylate (1a):** The title compound was prepared according to General Procedure A. Flash chromatography (20% EtOAc/hexanes) provided **1a** (0.618 g, 1.92 mmol, 96% yield) as a colorless oil. Analytical data for **1a**:  $^1\text{H NMR}$  (600 MHz,  $\text{CDCl}_3$ ):  $\delta$  7.31-7.27 (m, 3H), 7.25-7.24 (m, 2H), 5.22 (d,  $J$  = 12 Hz, 1H), 4.30 (d,  $J$  = 12 Hz, 1H), 4.26-4.19 (m, 2H), 3.74 (s, 3H), 3.46 (s, 3H), 1.26 (t,  $J$  = 7.2 Hz, 3 H);  $^{13}\text{C}$

**NMR** (150 MHz,  $\text{CDCl}_3$ ):  $\delta$  190.2, 168.2, 167.4, 159.5, 131.4, 129.4, 129.1, 128.6, 62.7, 54.5, 53.2, 52.7, 52.6, 13.8; **IR** (thin film  $\text{cm}^{-1}$ ): 2956, 1731, 1495, 1435, 1256, 1153, 1103, 1052, 854, 753, 700; **TLC** (20% EtOAc/hexanes):  $R_f$ : 0.27; **LRMS** (ESI): Calculated for  $[\text{M} + \text{H}]^+$   $\text{C}_{16}\text{H}_{18}\text{O}_7$ : 323.11, Found: 323.07.

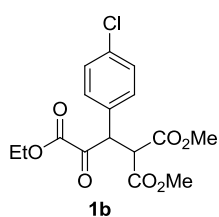

**3-Ethyl 1,1-dimethyl 2-(4-chlorophenyl)-3-oxopropane-1,1,3-tricarboxylate (1b):** The title compound was prepared according to General Procedure A. Flash chromatography (20% EtOAc/hexanes) provided **1b** (0.660 g, 1.9 mmol, 95% yield) as a colorless oil. Analytical data for **1b**:  $^1\text{H NMR}$  (600 MHz,  $\text{CDCl}_3$ ):  $\delta$  7.30 (d,  $J$  = 7.8 Hz, 2H), 7.21 (d,  $J$  = 8.4 Hz, 2H), 5.22 (d,  $J$  = 12 Hz, 1H), 4.29 (d,  $J$  = 12 Hz, 1H), 4.28-4.22 (m, 2H), 3.75 (s, 3H), 3.51 (s, 3H), 1.29 (t,  $J$  = 7.2 Hz, 3H);

$^{13}\text{C NMR}$  (150 MHz,  $\text{CDCl}_3$ ):  $\delta$  189.9, 168.0, 167.2, 159.4, 134.8, 130.7, 130.1, 129.4, 62.9, 54.5, 53.3, 52.7, 51.8, 13.9; **IR** (thin film,  $\text{cm}^{-1}$ ): 3649, 2956, 1732, 1491, 1435, 1258, 1154, 1094, 1051, 936, 854, 717, 597; **TLC** (20% EtOAc/hexanes):  $R_f$ : 0.32; **LRMS** (ESI): Calculated for  $[\text{M} + \text{H}]^+$   $\text{C}_{16}\text{H}_{18}\text{ClO}_7$ : 357.07, Found: 357.02.

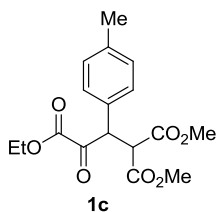

**3-Ethyl 1,1-dimethyl 3-oxo-2-(p-tolyl)propane-1,1,3-tricarboxylate (1c):** The title compound was prepared according to General Procedure A. Flash chromatography (20% EtOAc/hexanes) provided **1c** (0.618 g, 1.84 mmol, 92% yield) as a colorless oil. Analytical data for **1c**:  $^1\text{H NMR}$  (600 MHz,  $\text{CDCl}_3$ ):  $\delta$  7.12 (m, 4H), 5.19 (d,  $J$  = 12 Hz, 1H), 4.29 (d,  $J$  = 12 Hz, 1H), 4.27-4.18 (m, 2H), 3.75 (s, 3H), 3.49 (s, 3H), 2.30 (s, 3H), 1.28 (t,  $J$  = 7.2 Hz, 3H);  $^{13}\text{C NMR}$  (150 MHz,

$\text{CDCl}_3$ ):  $\delta$  190.2, 168.3, 167.5, 159.6, 138.5, 129.9, 129.3, 128.2, 62.7, 54.5, 53.1, 52.6, 52.3, 21.1, 13.9; **IR** (thin film,  $\text{cm}^{-1}$ ): 3649, 2956, 1731, 1513, 1436, 1257, 1153, 1100, 1053, 854, 801, 718, 601;

**TLC** (20% EtOAc/hexanes):  $R_f$ : 0.32; **LRMS** (ESI): Calculated for  $[M+H]^+$   $C_{17}H_{21}O_7$ : 337.13, Found: 337.15.

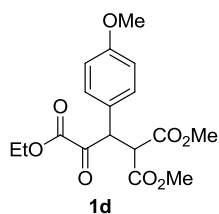

**3-Ethyl 1,1-dimethyl 2-(4-methoxyphenyl)-3-oxopropane-1,1,3-tricarboxylate (1d)**: The title compound was prepared according to General Procedure A. Flash chromatography (30% EtOAc/hexanes) provided **1d** (0.655 g, 1.86 mmol, 93% yield) as a colorless oil. Analytical data for **1d**:  $^1H$  NMR (600 MHz,  $CDCl_3$ ):  $\delta$  7.16 (d,  $J$  = 9.0 Hz, 2H), 6.83 (d,  $J$  = 8.4 Hz, 2H), 5.17 (d,  $J$  = 12 Hz, 1H), 4.27 (d,  $J$  = 12 Hz, 1H), 4.26-4.19 (m, 2H), 3.76 (s, 3H), 3.74 (s, 3H), 3.49 (s, 3H), 1.27 (t,  $J$  = 7.2 Hz, 3H);  $^{13}C$  NMR (150 MHz,  $CDCl_3$ ):  $\delta$  190.0, 168.2, 167.5, 159.7, 159.6, 130.6, 123.0, 114.6, 62.7, 55.2, 54.4, 53.1, 52.6, 51.8, 13.9; **IR** (thin film,  $cm^{-1}$ ): 2956, 1731, 1609, 1511, 1436, 1304, 1256, 1180, 1153, 1099, 1052, 1031, 832, 741, 602; **TLC** (30% EtOAc/hexanes):  $R_f$ : 0.34; **LRMS** (ESI): Calculated for  $[M+H]^+$   $C_{17}H_{21}O_8$ : 353.12, Found: 353.17.

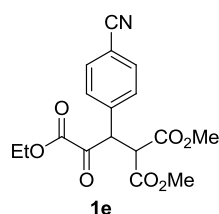

**3-Ethyl 1,1-dimethyl 2-(4-cyanophenyl)-3-oxopropane-1,1,3-tricarboxylate (1e)**: The title compound was prepared according to General Procedure A. Flash chromatography (30% EtOAc/hexanes) provided **1e** (0.625 g, 1.80 mmol, 90% yield) as a white solid. Analytical data for **1e**:  $^1H$  NMR (600 MHz,  $CDCl_3$ ):  $\delta$  7.62 (d,  $J$  = 7.8 Hz, 2H), 7.42 (d,  $J$  = 7.8 Hz, 2H), 5.29 (d,  $J$  = 12 Hz, 1H), 4.32 (d,  $J$  = 12 Hz, 1H), 4.30-4.23 (m, 2H), 3.75 (s, 3H), 3.50 (s, 3H), 1.30 (t,  $J$  = 7.2 Hz, 3H);  $^{13}C$  NMR (150 MHz,  $CDCl_3$ ):  $\delta$  189.5, 167.8, 166.9, 159.2, 137.3, 132.7, 130.1, 118.0, 112.7, 63.1, 54.5, 53.4, 52.8, 52.2, 13.8; **IR** (thin film,  $cm^{-1}$ ): 2957, 2230, 1732, 1506, 1436, 1259, 1156, 1097, 1051, 836; **m.p.** 71-73  $^{\circ}C$ ; **TLC** (30% EtOAc/hexanes):  $R_f$ : 0.32; **LRMS** (ESI): Calculated for  $[M+H]^+$   $C_{17}H_{18}NO_7$ : 348.11, Found: 348.14.

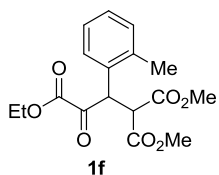

**3-Ethyl 1,1-dimethyl 3-oxo-2-(o-tolyl)propane-1,1,3-tricarboxylate (1f)**: The title compound was prepared according to General Procedure A. Flash chromatography (20% EtOAc/hexanes) provided **1f** (0.524 g, 1.56 mmol, 78% yield) as a colorless oil. Analytical data for **1f**:  $^1H$  NMR (600 MHz,  $CDCl_3$ ):  $\delta$  7.18-7.12 (m, 3H), 7.11-7.01 (m, 2H), 5.47 (d,  $J$  = 11.6 Hz, 1H), 4.29 (d,  $J$  = 11.6 Hz, 1H), 4.25-4.16 (m, 2H), 3.76 (s, 3H), 3.42 (s, 3H), 2.54 (s, 3H), 1.24 (t,  $J$  = 7.2 Hz, 3H);  $^{13}C$  NMR (100 MHz,  $CDCl_3$ ):  $\delta$  190.3, 168.3, 167.6, 159.8, 138.5, 131.4, 129.7, 128.5, 128.2, 126.5, 62.7, 54.4, 53.1, 52.4, 48.3, 19.6, 13.8; **IR** (thin film,  $cm^{-1}$ ): 3578, 2964, 1734, 1523, 1441, 1264, 1148, 1110, 1057, 852, 806, 714, 605; **TLC** (20% EtOAc/hexanes):  $R_f$ : 0.33; **LRMS** (ESI): Calculated for  $[M+H]^+$   $C_{17}H_{21}O_7$ : 337.13, Found: 337.14.

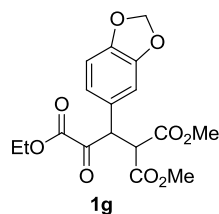

**3-Ethyl 1,1-dimethyl 2-(benzo[d][1,3]dioxol-5-yl)-3-oxopropane-1,1,3-tricarboxylate (1g)**: The title compound was prepared according to General Procedure A on a 10 mmol scale. Flash chromatography (30% EtOAc/hexanes) provided **1g** (3.33 g, 9.10 mmol, 91% yield) as a viscous yellow oil. Analytical data for **1g**:  $^1H$  NMR (600 MHz,  $CDCl_3$ ):  $\delta$  6.74-6.70 (m, 3H), 5.95 (bs, 2H), 5.14 (d,  $J$  = 12 Hz, 1H), 4.24 (d,  $J$  = 12 Hz, 1H), 4.29-4.22 (m, 2H), 3.74 (s, 3H), 3.54 (s, 3H), 1.29 (t,  $J$  = 7.2 Hz, 3H);  $^{13}C$  NMR (150 MHz,  $CDCl_3$ ):  $\delta$  189.9, 168.2, 167.4, 159.6, 148.2, 147.9, 124.6, 123.2, 109.5, 108.8, 101.4, 62.8, 54.6, 53.2, 52.7, 52.0, 13.9; **IR** (thin film,  $cm^{-1}$ ): 2956, 2360, 1731, 1505, 1489, 1440, 1249, 1225, 1153, 1095, 1037, 932, 857, 812, 638; **TLC** (30% EtOAc/hexanes):  $R_f$ : 0.35; **LRMS** (ESI): Calculated for  $[M+H]^+$   $C_{17}H_{19}O_9$ : 367.10, Found: 367.01.

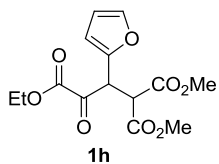

**3-Ethyl 1,1-dimethyl 2-(furan-2-yl)-3-oxopropane-1,1,3-tricarboxylate (1h):**

The title compound was prepared according to General Procedure A. Flash chromatography (20% EtOAc/hexanes) provided **1h** (0.543 g, 1.74 mmol, 87% yield) as an orange oil. Analytical data for **1h**:  $^1\text{H NMR}$  (600 MHz,  $\text{CDCl}_3$ ):  $\delta$  7.37 (s, 1H), 6.32-6.30 (m, 2H), 5.40 (d,  $J$  = 12 Hz, 1H), 4.36 (d,  $J$  = 12 Hz, 1H), 4.33-4.25 (m, 2H), 3.75 (s, 3H), 3.62 (s, 3H), 1.32 (t,  $J$  = 7.2 Hz, 3H);  $^{13}\text{C NMR}$  (150 MHz,  $\text{CDCl}_3$ ):  $\delta$  187.3, 167.9, 167.3, 159.5, 145.0, 143.9, 111.0, 110.7, 62.9, 53.2, 52.9, 52.4, 46.5, 13.9; **IR** (thin film,  $\text{cm}^{-1}$ ): 2957, 1736, 1499, 1436, 1252, 1153, 1100, 1051, 1014, 749, 599; **TLC** (20% EtOAc/hexanes):  $R_f$ : 0.27; **LRMS** (ESI): Calculated for  $[\text{M}+\text{H}]^+$   $\text{C}_{14}\text{H}_{17}\text{O}_8$ : 313.09, Found: 313.13.

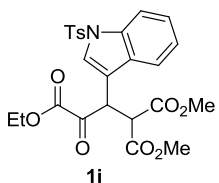

**3-Ethyl 1,1-dimethyl 3-oxo-2-(1-tosyl-1H-indol-3-yl)propane-1,1,3-tricarboxylate (1i):**

The title compound was prepared according to General Procedure A. Flash chromatography (30% EtOAc/hexanes) provided **1i** (0.918 g, 1.78 mmol, 89% yield) as a viscous yellow oil. Analytical data for **1i**:  $^1\text{H NMR}$  (400 MHz,  $\text{CDCl}_3$ ):  $\delta$  7.94 (d,  $J$  = 8.4 Hz, 1H), 7.70 (d,  $J$  = 8.4 Hz, 2H), 7.67 (m, 1H), 7.51 (s, 1H), 7.33-7.30 (m, 2H), 7.23-7.21 (m, 2H), 5.48 (d,  $J$  = 11.6 Hz, 1H), 4.39 (d,  $J$  = 11.6 Hz, 1H), 4.21-4.12 (m, 2H), 3.77 (s, 3H), 3.25 (s, 3H), 2.33 (s, 3H), 1.15 (t,  $J$  = 7.2 Hz, 3H);  $^{13}\text{C NMR}$  (100 MHz,  $\text{CDCl}_3$ ):  $\delta$  188.9, 168.0, 167.2, 159.5, 145.1, 135.1, 134.9, 129.9, 126.8, 126.4, 125.4, 123.7, 119.9, 113.6, 113.4, 62.8, 53.9, 53.2, 52.5, 43.5, 21.5, 13.7; **IR** (thin film,  $\text{cm}^{-1}$ ): 2955, 1732, 1596, 1447, 1372, 1286, 1251, 1176, 1123, 1093, 1050, 979, 814, 748, 704, 669, 573, 538; **TLC** (30% EtOAc/hexanes):  $R_f$ : 0.25; **LRMS** (ESI): Calculated for  $[\text{M}+\text{Na}]$   $\text{C}_{25}\text{H}_{25}\text{NO}_9\text{SNa}$  + MeOH: 570.14, Found: 570.03.

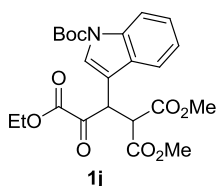

**3-Ethyl 1,1-dimethyl 2-(1-(tert-butoxycarbonyl)-1H-indol-3-yl)-3-oxopropane-1,1,3-tricarboxylate (1j):**

The title compound was prepared according to General Procedure A. Flash chromatography (20% EtOAc/hexanes) provided **1j** (0.775 g, 1.68 mmol, 84% yield) as a pale yellow solid. Analytical data for **1j**:  $^1\text{H NMR}$  (400 MHz,  $\text{CDCl}_3$ ):  $\delta$  8.12 (d,  $J$  = 8.0 Hz, 1H), 7.70-7.68 (m, 1H), 7.45 (s, 1H), 7.35-7.27 (m, 2H), 5.53 (d,  $J$  = 11.6 Hz, 1H), 4.39 (d,  $J$  = 11.6 Hz, 1H), 4.25-4.15 (m, 2H), 3.78 (s, 3H), 3.43 (s, 3H), 1.65 (s, 9H), 1.22 (t,  $J$  = 7.2 Hz, 3H);  $^{13}\text{C NMR}$  (150 MHz,  $\text{CDCl}_3$ ):  $\delta$  188.9, 168.2, 167.2, 159.5, 149.1, 135.5, 128.7, 125.9, 125.0, 123.0, 119.3, 115.2, 111.0, 84.3, 62.8, 54.0, 53.2, 52.7, 43.3, 28.1, 13.7; **IR** (thin film,  $\text{cm}^{-1}$ ): 2980, 1733, 1453, 1367, 1257, 1154, 1083, 1051, 748; **m.p.**: 96-97.5  $^{\circ}\text{C}$ ; **TLC** (20% EtOAc/hexanes)  $R_f$ : 0.29; **LRMS** (ESI): Calculated for  $[\text{M}+\text{Na}]$   $\text{C}_{23}\text{H}_{17}\text{NO}_9\text{Na}$  + MeOH: 516.18, Found: 516.21.

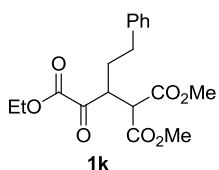

**3-Ethyl 1,1-dimethyl 3-oxo-2-phenethylpropane-1,1,3-tricarboxylate (1k):**

The title compound was prepared according to General Procedure A. Flash chromatography (20% EtOAc/hexanes) provided **1k** (0.775 g, 1.86 mmol, 93% yield) as a colorless oil. Analytical data for **1k**:  $^1\text{H NMR}$  (600 MHz,  $\text{CDCl}_3$ ):  $\delta$  7.29-7.26 (m, 2H), 7.21-7.18 (m, 1H), 7.12-7.11 (m, 2H), 4.41-4.33 (m, 2H), 4.13 (ddd,  $J$  = 10.8, 8.4, 4.2 Hz, 1H), 3.97 (d,  $J$  = 10.8 Hz, 1H), 3.98 (s, 3H), 3.97 (s, 3H), 2.59-2.56 (m, 2H), 1.99-1.87 (m, 2H), 1.40 (t,  $J$  = 7.2 Hz, 3H);  $^{13}\text{C NMR}$  (150 MHz,  $\text{CDCl}_3$ ):  $\delta$  194.8, 168.6, 168.1, 140.6, 128.5, 128.3, 126.3, 62.7, 54.2, 53.1, 52.9, 45.2, 32.4, 31.7, 14.0; **IR** (thin film,  $\text{cm}^{-1}$ ): 2955, 1797, 1730, 1603, 1496, 1455, 1436, 1257, 1155, 1097, 1064, 752, 700; **TLC** (20% EtOAc/hexanes)  $R_f$ : 0.29; **LRMS** (ESI): Calculated for  $[\text{M}+\text{H}]^+$   $\text{C}_{18}\text{H}_{23}\text{O}_7$ : 351.14, Found: 351.16.

### Preparation of *m*-Terphenyl Sulfonyl Chloride **S1**

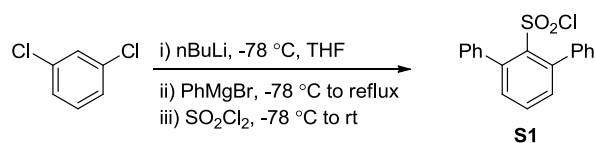

To a flame-dried 50-mL round-bottomed flask equipped with a magnetic stir bar and rubber septum were added 1,3-dichlorobenzene (1.47 g, 10.0 mmol, 1.0 equiv) and THF (25 mL). The solution was cooled to  $-78\text{ }^\circ\text{C}$  and *n*BuLi (1.6 M in hexanes, 11.0 mmol, 1.1 equiv) was added dropwise over 10 min. The resultant white slurry was stirred at  $-78\text{ }^\circ\text{C}$  for 1.5 hrs. While being kept at  $-78\text{ }^\circ\text{C}$ , this reaction mixture was then added to a room temperature solution of phenylmagnesium bromide [prepared from bromobenzene (3.14 g, 20.0 mmol, 2.0 equiv) and magnesium (578 mg, 24.0 mmol, 2.4 equiv)] in 30 mL of THF via cannula. The mixture was heated at reflux overnight, cooled to ambient temperature, and then to  $-78\text{ }^\circ\text{C}$ . Sulfuryl chloride (1 M in  $\text{CH}_2\text{Cl}_2$ , 20.0 mmol, 2.0 equiv) was added via syringe in a single portion and the reaction was warmed slowly to room temperature overnight. After being cooled to  $0\text{ }^\circ\text{C}$ , the reaction mixture was diluted with 1 M HCl and extracted three times with diethyl ether. The combined organic extracts were washed with brine, dried over sodium sulfate and concentrated *in vacuo*. The crude brown solid was recrystallized from hexanes and  $\text{CHCl}_3$  to give the desired sulfonyl chloride (2.0 g, 6.1 mmol, 61% yield) whose spectral properties matched those reported in the literature.<sup>1</sup>

### Preparation of **L8**

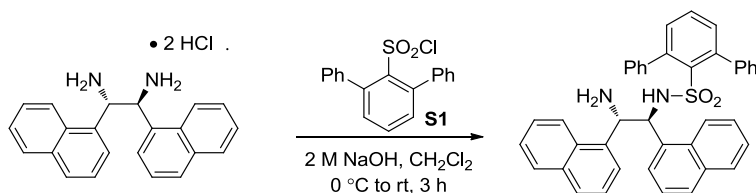

A 10-mL round-bottomed flask equipped with a magnetic stir bar was charged with (1*S*,2*S*)-1,2-di(1-naphthyl)-1,2-ethanediamine dihydrochloride (250 mg, 0.649 mmol, 1.0 equiv). Dichloromethane (3 mL) and 2 M NaOH (3 mL) were added sequentially and the biphasic mixture was cooled to  $0\text{ }^\circ\text{C}$ . *m*-Terphenyl sulfonyl chloride **S1** (213 mg, 0.649 mmol, 1.0 equiv) was added and the reaction was warmed to room temperature and stirred for 3 h. The reaction mixture was diluted with ethyl acetate and water. The organic was washed with brine, dried over sodium sulfate and concentrated *in vacuo*. Flash chromatography (50% EtOAc/hexanes) provided **L8** (330 mg, 0.545 mmol, 84% yield) as a white solid. Analytical data for **L8**:  $^1\text{H NMR}$  (400 MHz,  $\text{CDCl}_3$ ):  $\delta$  8.07 (d,  $J = 8.0\text{ Hz}$ , 1H), 7.78 (d,  $J = 8.0\text{ Hz}$ , 1H), 7.74 (d,  $J = 7.6\text{ Hz}$ , 1H), 7.72-7.67 (m, 2H), 7.66-7.02 (m, 20H), 6.97 (bs, 1H), 6.72 (bs, 1H), 5.57 (d,  $J = 6.4\text{ Hz}$ , 1H), 4.95 (d,  $J = 7.6\text{ Hz}$ ), 4.68 (bs, 1H), 1.75 (bs, 2H);  $^{13}\text{C NMR}$  (100 MHz,  $\text{CDCl}_3$ ):  $\delta$  141.9, 140.9, 139.7, 137.8, 135.3, 133.8, 133.6, 131.6, 131.0, 130.7, 130.0, 129.2, 128.8, 128.6, 128.2, 127.9, 127.7, 127.7, 126.1, 126.0, 125.4, 125.3, 125.1, 125.0, 124.3, 123.6, 122.9, 122.4; **IR** (thin film,  $\text{cm}^{-1}$ ): 2926, 2357, 1868, 1716, 1608, 1541, 1507, 1456, 1338, 1158, 1028, 929, 778, 759, 700, 664, 592, 529; **m.p.** 158-160  $^\circ\text{C}$ ; **TLC** (50% EtOAc/hexanes)  $R_f$ :

<sup>1</sup> Kosugi, Y.; Akakura, M.; Ishihara, K. *Tetrahedron* **2007**, 63, 6191.

0.25; **LRMS** (ESI): Calculated for  $[M+H]^+$   $C_{40}H_{33}N_2O_2S$ : 605.23, Found: 605.29;  $[\alpha]_D^{25} +170.6$  ( $c = 1.30$ ,  $CHCl_3$ ).

### **General Procedure B for the Preparation of Racemic $\gamma$ -Butyrolactones 2a-2j**

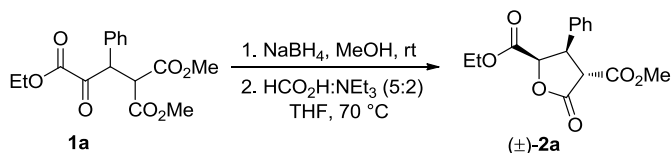

Sodium borohydride (1.0 equiv) was added to a solution of  $\beta$ -aryl  $\alpha$ -keto ester (1.0 equiv) in methanol (0.5 M concentration) at room temperature. When gas evolution ceased, 1 mL saturated ammonium chloride was added. The reaction was further diluted with diethyl ether and water. The organic layer was washed with brine, dried over sodium sulfate and concentrated *in vacuo* to give a mixture of  $\alpha$ -hydroxy ester and  $\gamma$ -butyrolactone. The crude reaction mixture was dissolved in tetrahydrofuran (0.5 M concentration) and formic acid:triethylamine 5:2 azeotrope (1.0 equiv) was added. The reaction heated at 70 °C for 1 hour, at which point the reaction mixture was allowed to cool to ambient temperature and diluted with diethyl ether and water. The organic layer was washed with brine and dried over sodium sulfate. Concentration *in vacuo* afforded the  $\gamma$ -butyrolactones which were purified by flash chromatography using the indicated solvent systems.

### **General Procedure C for the ATH-DKR of $\beta$ -Aryl $\alpha$ -Keto Esters**

To a flame-dried 1-dram vial equipped with a magnetic stir bar were added  $[RuCl(arene)]_2$  (0.02 equiv) and ligand (0.08 equiv). The vial was sealed with a rubber septum and purged with nitrogen. DMF (0.5 mL) was added and the rubber septum was quickly replaced with a PTFE-lined screw cap. The mixture was heated at 70 °C for 30 min and cooled to ambient temperature. A solution of  $\beta$ -aryl  $\alpha$ -keto ester (1.0 equiv in 1.0 mL DMF) followed by formic acid:triethylamine 5:2 azeotrope (5.0 equiv) were added. The vial was purged with nitrogen and the reaction was heated at 70 °C for 16 h, at which point the reaction mixture was allowed to cool to ambient temperature and diluted with ethyl acetate and water. The organic layer was washed with water (x2), brine, and dried over sodium sulfate. Concentration *in vacuo* afforded the  $\gamma$ -butyrolactones which were purified by flash chromatography using the indicated solvent systems.

### **Catalyst Optimization Studies**

## Optimization of $[\text{RuCl}_2(\text{arene})]_2$ with 1a and L1

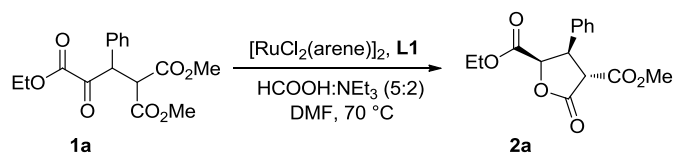

| $[\text{RuCl}_2(\text{arene})]_2$             | e.r.  |
|-----------------------------------------------|-------|
| $[\text{RuCl}_2(\text{hexamethylbenzene})]_2$ | 62:38 |
| $[\text{RuCl}_2(p\text{-cymene})]_2$          | 70:30 |
| $[\text{RuCl}_2(\text{benzene})]_2$           | 71:29 |

## Full Ligand Screen

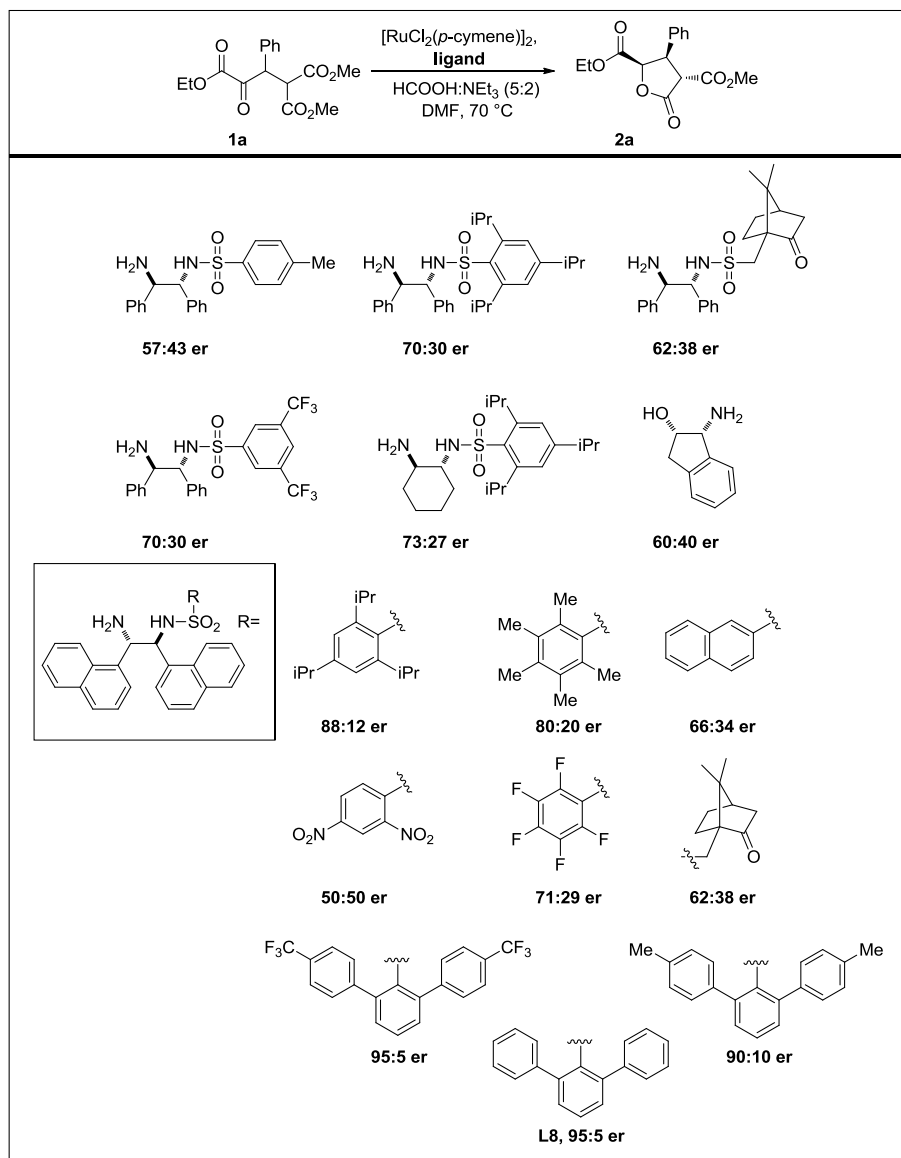

## Procedures for Synthesis of $\gamma$ -Butyrolactones 2a-2j

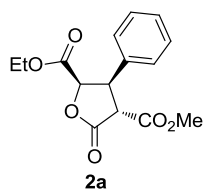

**(2R,3R,4R)-2-ethyl 4-methyl 5-oxo-3-phenyltetrahydrofuran-2,4-dicarboxylate (2a):** The title compound was prepared according to General Procedure C using  $\beta$ -aryl  $\alpha$ -keto ester **1a** (50 mg, 0.155 mmol, 1.0 equiv),  $[\text{RuCl}_2(p\text{-cymene})]_2$  (1.9 mg, 0.0031 mmol, 0.02 equiv), **L8** (7.5 mg, 0.0124 mmol, 0.08 equiv), and  $\text{HCOOH}:\text{NEt}_3$  5:2 azeotrope (67 mg, 0.775 mmol, 5.0 equiv).

Flash chromatography (20% EtOAc/hexanes) provided  $\gamma$ -butyrolactone **2a** (42.0 mg, 0.143 mmol, 92% yield) as a white solid. Analytical data for **2a**:  $^1\text{H NMR}$  (600 MHz,  $\text{CDCl}_3$ ):  $\delta$  7.35-7.32 (m, 3H), 7.22-7.20 (m, 2H), 5.18 (d,  $J$  = 8.4 Hz, 1H), 4.52 (dd,  $J$  = 12, 8.4 Hz, 1H), 4.25 (d,  $J$  = 12 Hz, 1H), 3.92-3.87 (m, 1H), 3.87 (s, 3H), 3.86-3.74 (m, 1H), 0.84 (t,  $J$  = 7.2 Hz, 3H);  $^{13}\text{C NMR}$  (150 MHz,  $\text{CDCl}_3$ ):  $\delta$  170.5, 167.7, 167.2, 132.6, 129.0, 128.7, 127.4, 78.9, 61.7, 53.4, 48.7, 47.8, 13.5; **IR** (thin film,  $\text{cm}^{-1}$ ): 2963, 1797, 1742, 1455, 1437, 1382, 1280, 1218, 1133, 1075, 994, 940, 751, 699; **m.p.** 100-102  $^\circ\text{C}$ ; **TLC** (20% EtOAc/hexanes)  $R_f$ : 0.26; **LRMS** (ESI): Calculated for  $[\text{M}+\text{H}]^+$   $\text{C}_{15}\text{H}_{17}\text{O}_6$ : 293.10, Found: 293.16 **SFC Analysis**: WO column, 2% MeOH, 1.5 mL/min, 150 bar, 210 nm;  $t_{\text{minor}}$  = 12.5 min  $t_{\text{major}}$  = 14.5, 95:5 er;  $[\alpha]_{\text{D}}^{25}$  -150.9 ( $c$  = 1.70,  $\text{CHCl}_3$ ).

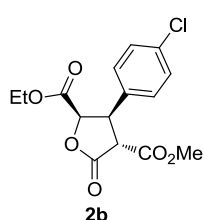

**(2R,3R,4R)-2-ethyl 4-methyl 3-(4-chlorophenyl)-5-oxotetrahydrofuran-2,4-dicarboxylate (2b):** The title compound was prepared according to General Procedure C using  $\beta$ -aryl  $\alpha$ -keto ester **1b** (55 mg, 0.155 mmol, 1.0 equiv),  $[\text{RuCl}_2(p\text{-cymene})]_2$  (1.9 mg, 0.0031 mmol, 0.02 equiv), **L8** (7.5 mg, 0.0124 mmol, 0.08 equiv), and  $\text{HCOOH}:\text{NEt}_3$  5:2 azeotrope (67 mg, 0.775 mmol, 5.0 equiv).

Flash chromatography provided  $\gamma$ -butyrolactone **2b** (47.6 mg, 0.146 mmol, 94% yield) as a white solid. Analytical data for **2b**:  $^1\text{H NMR}$  (400 MHz,  $\text{CDCl}_3$ ):  $\delta$  7.34 (d,  $J$  = 8.8 Hz, 2H), 7.16 (d,  $J$  = 8.8 Hz, 2H), 5.16 (d,  $J$  = 8.4 Hz, 1H), 4.48 (dd,  $J$  = 11.2, 8.4 Hz, 1H), 4.18 (d,  $J$  = 11.2 Hz, 1H), 3.98-3.90 (m, 1H), 3.87-3.82 (m, 1H), 3.81 (s, 3H), 0.92 (t,  $J$  = 7.2 Hz, 3H);  $^{13}\text{C NMR}$  (100 MHz,  $\text{CDCl}_3$ ):  $\delta$  170.0, 167.6, 167.0, 134.8, 131.3, 129.6, 129.2, 128.9, 128.5, 78.6, 61.9, 53.5, 48.9, 47.2, 13.6; **IR** (thin film,  $\text{cm}^{-1}$ ): 2957, 1796, 1741, 1437, 1382, 1302, 1213, 1128, 1060, 840, 708, 564; **m.p.** 94-94  $^\circ\text{C}$ ; **TLC** (20% EtOAc/hexanes)  $R_f$ : 0.31; **LRMS** (ESI): Calculated for  $[\text{M}+\text{H}]^+$   $\text{C}_{15}\text{H}_{16}\text{ClO}_6$ : 327.06, Found: 327.10; **SFC Analysis**: WO column, 2% MeOH, 1.5 mL/min, 150 bar, 210 nm;  $t_{\text{minor}}$  = 13.4 min  $t_{\text{major}}$  = 17.3, 96:4 er;  $[\alpha]_{\text{D}}^{25}$  -143.1 ( $c$  = 1.5,  $\text{CHCl}_3$ ).

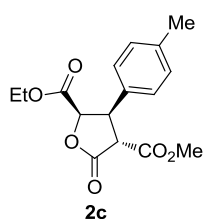

**(2R,3R,4R)-2-ethyl 4-methyl 5-oxo-3-(p-tolyl)tetrahydrofuran-2,4-dicarboxylate (2c):** The title compound was prepared according to General Procedure C using  $\beta$ -aryl  $\alpha$ -keto ester **1c** (52 mg, 0.155 mmol, 1.0 equiv),  $[\text{RuCl}_2(p\text{-cymene})]_2$  (1.9 mg, 0.0031 mmol, 0.02 equiv), **L8** (7.5 mg, 0.0124 mmol, 0.08 equiv), and  $\text{HCOOH}:\text{NEt}_3$  5:2 azeotrope (67 mg, 0.775 mmol, 5.0 equiv).

Flash chromatography provided  $\gamma$ -butyrolactone **2c** (40 mg, 0.130 mmol, 84% yield) as a white solid. Analytical data for **2c**:  $^1\text{H NMR}$  (400 MHz,  $\text{CDCl}_3$ ):  $\delta$  7.15 (d,  $J$  = 8.0 Hz, 2H), 7.09 (d,  $J$  = 8.0 Hz, 2H), 5.15 (d,  $J$  = 8.8 Hz, 1H), 4.47 (dd,  $J$  = 11.2, 8 Hz, 1H), 4.21 (d,  $J$  = 11.2 Hz, 1H), 3.93-3.89 (m, 1H), 3.82-3.78 (m, 1H), 3.79 (s, 3H), 0.88 (t,  $J$  = 7.2 Hz, 3H);  $^{13}\text{C NMR}$  (100 MHz,  $\text{CDCl}_3$ ):  $\delta$  170.5, 167.8, 167.3, 138.5, 129.6, 127.3, 79.0, 61.7, 53.3, 49.0, 47.6, 21.0, 13.5; **IR** (thin film,  $\text{cm}^{-1}$ ): 2957, 1796, 1742, 1519, 1438, 1381, 1306, 1213, 1131, 1058, 828, 517; **m.p.** 85-86  $^\circ\text{C}$ ; **TLC** (30% EtOAc/hexanes)  $R_f$ : 0.38; **LRMS** (ESI): Calculated for  $[\text{M}+\text{H}]^+$   $\text{C}_{16}\text{H}_{19}\text{O}_6$ : 307.12, Found: 307.16; **HPLC Analysis**: Chiralpak IB, 10%  $i$ PrOH/hexanes, constant flow at 1.00 mL/min, 210 nm;  $t_{\text{minor}}$  = 12.5 min  $t_{\text{major}}$  = 15.8 min, 95.5:4.5 er;  $[\alpha]_{\text{D}}^{25}$  -191.3 ( $c$  = 1.7,  $\text{CHCl}_3$ ).

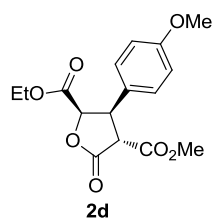

**(2R,3R,4R)-2-ethyl 4-methyl 3-(4-methoxyphenyl)-5-oxotetrahydrofuran-2,4-dicarboxylate (2d):**

The title compound was prepared according to General Procedure C using  $\beta$ -aryl  $\alpha$ -keto ester **1d** (55 mg, 0.155 mmol, 1.0 equiv),  $[\text{RuCl}_2(p\text{-cymene})]_2$  (1.9 mg, 0.0031 mmol, 0.02 equiv), **L8** (7.5 mg, 0.0124 mmol, 0.08 equiv), and  $\text{HCOOH}:\text{NEt}_3$  5:2 azeotrope (67 mg, 0.775 mmol, 5.0 equiv).

Flash chromatography provided  $\gamma$ -butyrolactone **2d** (45 mg, 0.140 mmol, 90% yield) as a white solid. Analytical data for **2d**:  $^1\text{H NMR}$  (600 MHz,  $\text{CDCl}_3$ ):  $\delta$  7.13

(d,  $J$  = 9.0 Hz, 2H), 6.87 (d,  $J$  = 9.0 Hz, 2H), 5.14 (d,  $J$  = 8.4 Hz, 1H), 4.45 (dd,  $J$  = 11.4, 8.4 Hz, 1H), 4.19 (d,  $J$  = 11.4 Hz, 1H), 3.95-3.80 (m, 1H), 3.84-3.8 (m, 1H), 3.79 (s, 3H), 3.78 (s, 3H), 0.93 (t,  $J$  = 7.2 Hz, 3H);  $^{13}\text{C NMR}$  (150 MHz,  $\text{CDCl}_3$ ):  $\delta$  170.5, 167.8, 167.3, 159.8, 128.6, 124.5, 114.3, 79.0, 61.7, 55.3, 53.4, 49.1, 47.2, 13.6; **IR** (thin film,  $\text{cm}^{-1}$ ): 2958, 1796, 1742, 1613, 1518, 1440, 1382, 1256, 1218, 1182, 1132, 1096, 1058, 1030, 835, 750, 683; **m.p.** 106-107  $^\circ\text{C}$ ; **TLC** (30% EtOAc/hexanes)  $R_f$ : 0.31; **LRMS** (ESI): Calculated for  $[\text{M}+\text{Na}]$   $\text{C}_{16}\text{H}_{18}\text{O}_7\text{Na}$ : 345.10, Found: 345.18; **HPLC Analysis**: Chiralpak IB, 10%  $i$ PrOH/hexanes, constant flow at 1.00 mL/min, 210 nm;  $t_{\text{minor}}$  = 18.7 min  $t_{\text{major}}$  = 23.6 min, 95:5 er;  $[\alpha]_{\text{D}}^{25}$  -179.2 ( $c$  = 1.9,  $\text{CHCl}_3$ ).

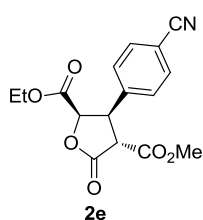

**(2R,3R,4R)-2-ethyl 4-methyl 3-(4-cyanophenyl)-5-oxotetrahydrofuran-2,4-dicarboxylate (2e):**

The title compound was prepared according to General Procedure C using  $\beta$ -aryl  $\alpha$ -keto ester **1e** (54 mg, 0.155 mmol, 1.0 equiv),  $[\text{RuCl}_2(p\text{-cymene})]_2$  (1.9 mg, 0.0031 mmol, 0.02 equiv), **L8** (7.5 mg, 0.0124 mmol, 0.08 equiv), and  $\text{HCOOH}:\text{NEt}_3$  5:2 azeotrope (67 mg, 0.775 mmol, 5.0 equiv).

Flash chromatography provided  $\gamma$ -butyrolactone **2d** (43 mg, 0.136 mmol, 88%

yield) as a white solid. Analytical data for **2e**:  $^1\text{H NMR}$  (400 MHz,  $\text{CDCl}_3$ ):  $\delta$  7.67 (d,  $J$  = 8.0 Hz, 2H), 7.35 (d,  $J$  = 8.0 Hz, 2H), 5.21 (d,  $J$  = 8.8 Hz, 1H), 4.56 (dd,  $J$  = 11.2, 8.8 Hz, 1H), 4.21 (d,  $J$  = 11.2 Hz, 1H), 3.96-3.90 (m, 1H), 3.85-3.79 (m, 1H), 3.82 (s, 3H), 0.90 (t,  $J$  = 7.2 Hz, 3H);  $^{13}\text{C NMR}$  (100 MHz,  $\text{CDCl}_3$ ):  $\delta$  169.4, 167.3, 166.7, 138.2, 132.7, 128.4, 117.9, 112.8, 78.1, 62.1, 53.6, 48.6, 47.6, 13.6; **IR** (thin film,  $\text{cm}^{-1}$ ): 2360, 2333, 1796, 1742, 1312, 1271, 1134, 995, 836, 670; **m.p.** 104-107  $^\circ\text{C}$ ; **TLC** (30% EtOAc/hexanes)  $R_f$ : 0.25; **LRMS** (ESI): Calculated for  $[\text{M}+\text{Na}]$   $\text{C}_{16}\text{H}_{15}\text{NO}_6\text{Na}$ : 340.08, Found: 340.18; **HPLC Analysis**: Chiralpak IB, 25%  $i$ PrOH/hexanes, constant flow at 1.00 mL/min, 210 nm;  $t_{\text{minor}}$  = 18.6 min  $t_{\text{major}}$  = 22.4 min, 95:5 er;  $[\alpha]_{\text{D}}^{25}$  -177.4 ( $c$  = 1.7,  $\text{CHCl}_3$ ).

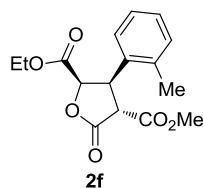

**(2R,3R,4R)-2-ethyl 4-methyl 5-oxo-3-(o-tolyl)tetrahydrofuran-2,4-dicarboxylate (2f):**

The title compound was prepared according to General Procedure C using  $\beta$ -aryl  $\alpha$ -keto ester **1f** (52 mg, 0.155 mmol, 1.0 equiv),  $[\text{RuCl}_2(p\text{-cymene})]_2$  (1.9 mg, 0.0031 mmol, 0.02 equiv), **L8** (7.5 mg, 0.0124 mmol, 0.08 equiv), and  $\text{HCOOH}:\text{NEt}_3$  5:2 azeotrope (67 mg, 0.775 mmol, 5.0 equiv).

Flash chromatography provided  $\gamma$ -butyrolactone **2d** (39 mg, 0.127 mmol, 82%

yield) as a white solid. Analytical data for **2f**:  $^1\text{H NMR}$  (400 MHz,  $\text{CDCl}_3$ ):  $\delta$  7.23-7.21 (m, 2H), 7.19-7.16 (m, 1H), 7.09-7.07 (m, 1H), 5.24 (d,  $J$  = 8.8 Hz, 1H), 4.72 (dd,  $J$  = 12, 8.8 Hz, 1H), 4.34 (d,  $J$  = 12 Hz, 1H), 3.86-3.81 (m, 1H), 3.79 (s, 3H), 3.74-3.7 (m, 1H), 0.80 (t,  $J$  = 7.2 Hz, 3H);  $^{13}\text{C NMR}$  (100 MHz,  $\text{CDCl}_3$ ):  $\delta$  170.5, 167.7, 167.3, 137.4, 131.0, 130.7, 128.5, 126.5, 125.0, 77.3, 61.6, 53.3, 48.3, 44.8, 19.6, 13.4; **IR** (thin film,  $\text{cm}^{-1}$ ): 2359, 2341, 1797, 1742, 1440, 1381, 1317, 1212, 1135, 1021, 752, 538; **m.p.** 103-104  $^\circ\text{C}$ ; **TLC** (20% EtOAc/hexanes)  $R_f$ : 0.29; **LRMS** (ESI): Calculated for  $[\text{M}+\text{H}]^+$   $\text{C}_{16}\text{H}_{19}\text{O}_6$ : 307.12, Found: 307.16; **HPLC Analysis**: Chiralpak IB, 10%  $i$ PrOH/hexanes, constant flow at 1.00 mL/min, 210 nm;  $t_{\text{minor}}$  = 12.1 min  $t_{\text{major}}$  = 15.0 min, 89:11 er;  $[\alpha]_{\text{D}}^{25}$  -136.4 ( $c$  = 1.4,  $\text{CHCl}_3$ ).

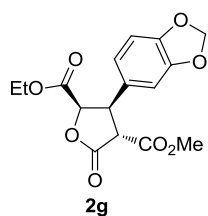

**(2R,3R,4R)-2-ethyl 4-methyl 3-(benzo[d][1,3]dioxol-5-yl)-5-oxotetrahydrofuran-2,4-dicarboxylate (2g):** The title compound was prepared according to General Procedure C using  $\beta$ -aryl  $\alpha$ -keto ester **1g** (57 mg, 0.155 mmol, 1.0 equiv),  $[\text{RuCl}_2(p\text{-cymene})]_2$  (1.9 mg, 0.0031 mmol, 0.02 equiv), **L8** (7.5 mg, 0.0124 mmol, 0.08 equiv), and  $\text{HCOOH}:\text{NEt}_3$  5:2 azeotrope (67 mg, 0.775 mmol, 5.0 equiv). Flash chromatography provided  $\gamma$ -butyrolactone **2d** (43 mg, 0.129 mmol, 83% yield) as a white solid. Analytical data for **2g**:  $^1\text{H NMR}$  (400 MHz,  $\text{CDCl}_3$ ):  $\delta$  6.77 (d,  $J$  = 8.4 Hz, 1H), 6.68-6.67 (m, 2H), 5.96 (s, 2H), 5.12 (d,  $J$  = 8.4 Hz, 1H), 4.41 (dd,  $J$  = 11.6, 8.4 Hz, 1H), 4.14 (d,  $J$  = 11.6 Hz, 1H), 4.05-3.87 (m, 2H), 3.80 (s, 3H), 0.98 (t,  $J$  = 7.2 Hz, 3H);  $^{13}\text{C NMR}$  (100 MHz,  $\text{CDCl}_3$ ):  $\delta$  170.3, 167.7, 167.2, 148.2, 147.9, 126.2, 120.9, 108.6, 107.8, 101.4, 78.9, 61.8, 53.3, 49.2, 47.7, 13.7; **IR** (thin film,  $\text{cm}^{-1}$ ): 2906, 2363, 2349, 1797, 1740, 1506, 1494, 1446, 1304, 1256, 1237, 1142, 1093, 1037, 931, 801; **m.p.** 86-87  $^\circ\text{C}$ ; **TLC** (30% EtOAc/hexanes)  $R_f$ : 0.31; **LRMS** (ESI): Calculated for  $[\text{M}+\text{H}]^+$   $\text{C}_{16}\text{H}_{17}\text{O}_8$ : 337.09, Found: 337.09; **HPLC Analysis**: Chiralpak IB, 10%  $i$ -PrOH/hexanes, constant flow at 1.00 mL/min, 210 nm;  $t_{\text{minor}}$  = 21.8 min  $t_{\text{major}}$  = 25.8 min, 96:4 er;  $[\alpha]_{\text{D}}^{25}$  -206.3 ( $c$  = 2.1,  $\text{CHCl}_3$ ).

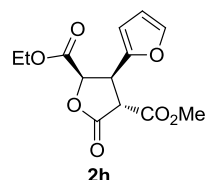

**(2R,3S,4R)-2-ethyl 4-methyl 3-(furan-2-yl)-5-oxotetrahydrofuran-2,4-dicarboxylate (2h):** The title compound was prepared according to General Procedure C using  $\beta$ -aryl  $\alpha$ -keto ester **1h** (48 mg, 0.155 mmol, 1.0 equiv),  $[\text{RuCl}_2(p\text{-cymene})]_2$  (1.9 mg, 0.0031 mmol, 0.02 equiv), **L8** (7.5 mg, 0.0124 mmol, 0.08 equiv), and  $\text{HCOOH}:\text{NEt}_3$  5:2 azeotrope (67 mg, 0.775 mmol, 5.0 equiv). Flash chromatography provided  $\gamma$ -butyrolactone **2h** (40 mg, 0.141 mmol, 91% yield) as a clear oil. Analytical data for **2h**:  $^1\text{H NMR}$  (400 MHz,  $\text{CDCl}_3$ ):  $\delta$  7.38-7.37 (m, 1H), 6.34-6.33 (m, 1H), 6.28-6.27 (m, 1H), 5.14 (d,  $J$  = 8.4 Hz, 1H), 4.56 (dd,  $J$  = 11.6, 8.4 Hz, 1H), 4.16 (d,  $J$  = 11.6, 1H), 4.10-4.04 (m, 1H), 3.99-3.92 (m, 1H), 3.82 (s, 3H), 1.09 (t,  $J$  = 7.2 Hz, 3H);  $^{13}\text{C NMR}$  (150 MHz,  $\text{CDCl}_3$ ):  $\delta$  169.6, 167.6, 166.8, 146.7, 143.2, 110.7, 109.0, 77.2, 62.2, 53.5, 48.2, 41.9, 13.7; **IR** (thin film,  $\text{cm}^{-1}$ ): 2963, 1797, 1743, 1440, 1382, 1305, 1215, 1133, 1061, 841, 708, 560; **TLC** (20% EtOAc/hexanes)  $R_f$ : 0.21; **LRMS** (ESI): Calculated for  $[\text{M}+\text{H}]^+$   $\text{C}_{13}\text{H}_{15}\text{O}_7$ : 283.08, Found: 283.03; **HPLC Analysis**: Chiralpak IA, 10%  $i$ -PrOH/hexanes, constant flow at 1.00 mL/min, 210 nm;  $t_{\text{minor}}$  = 11.4 min  $t_{\text{major}}$  = 12.5 min, 95:5 er;  $[\alpha]_{\text{D}}^{25}$  -52.3 ( $c$  = 1.2,  $\text{CHCl}_3$ ).

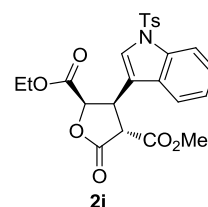

**(2R,3R,4R)-2-ethyl 4-methyl 5-oxo-3-(1-tosyl-1H-indol-3-yl)tetrahydrofuran-2,4-dicarboxylate (2i):** The title compound was prepared according to General Procedure C using  $\beta$ -aryl  $\alpha$ -keto ester **1i** (80 mg, 0.155 mmol, 1.0 equiv),  $[\text{RuCl}_2(p\text{-cymene})]_2$  (1.9 mg, 0.0031 mmol, 0.02 equiv), **L8** (7.5 mg, 0.0124 mmol, 0.08 equiv), and  $\text{HCOOH}:\text{NEt}_3$  5:2 azeotrope (67 mg, 0.775 mmol, 5.0 equiv). Flash chromatography provided  $\gamma$ -butyrolactone **2h** (68 mg, 0.141 mmol, 91% yield) as a white solid. Analytical data for **2i**:  $^1\text{H NMR}$  (400 MHz,  $\text{CDCl}_3$ ):  $\delta$  7.99 (d,  $J$  = 8.4 Hz, 1H), 7.76 (d,  $J$  = 8.4 Hz, 2H), 7.52 (d,  $J$  = 7.6 Hz, 1H), 7.42 (s, 1H), 7.37-7.35 (m, 1H), 7.32-7.30 (m, 1H), 7.54-7.23 (m, 1H), 5.30 (d,  $J$  = 8.4 Hz, 1H), 4.64 (dd,  $J$  = 11.6, 8.4 Hz, 1H), 4.20 (d,  $J$  = 11.6 Hz, 1H), 3.82 (s, 3H), 3.64-3.56 (m, 1H), 3.36-3.28 (m, 1H), 2.35 (s, 3H), 0.41 (t,  $J$  = 6.8 Hz, 3H);  $^{13}\text{C NMR}$  (150 MHz,  $\text{CDCl}_3$ ):  $\delta$  169.8, 167.6, 167.0, 145.3, 135.0, 134.8, 130.0, 129.2, 126.9, 125.6, 123.6, 123.4, 119.5, 115.5, 113.7, 77.6, 61.4, 53.5, 48.4, 39.9, 30.2, 21.5, 12.9; **IR** (thin film,  $\text{cm}^{-1}$ ): 2978, 2348, 1800, 1742, 1595, 1449, 1373, 1290, 1215, 1175, 1139, 1092, 1075, 1021, 974, 912, 816, 762, 747, 703, 680, 655; **m.p.** 99-100  $^\circ\text{C}$ ; **TLC** (30% EtOAc/hexanes)  $R_f$ : 0.28; **LRMS** (ESI): Calculated for  $[\text{M}+\text{Na}]$   $\text{C}_{24}\text{H}_{23}\text{NO}_8\text{SNa}$ : 508.10, Found: 508.10; **SFC Analysis**: WO column, 10%

MeOH, 1.5 mL/min, 150 bar 210 nm;  $t_{\text{minor}} = 16.5$  min  $t_{\text{major}} = 22.5$  min, 96.5:3.5 er;  $[\alpha]_{\text{D}}^{25} -81.2$  ( $c = 1.7$ ,  $\text{CHCl}_3$ ).

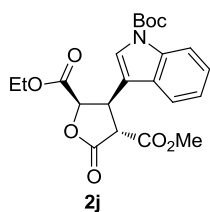

**(2R,3R,4R)-2-ethyl 4-methyl 3-(1-(tert-butoxycarbonyl)-1H-indol-3-yl)-5-oxotetrahydrofuran-2,4-dicarboxylate (2j):** The title compound was prepared according to General Procedure C using  $\beta$ -aryl  $\alpha$ -keto ester **1j** (71.5 mg, 0.155 mmol, 1.0 equiv),  $[\text{RuCl}_2(p\text{-cymene})]_2$  (1.9 mg, 0.0031 mmol, 0.02 equiv), **L8** (7.5 mg, 0.0124 mmol, 0.08 equiv), and  $\text{HCOOH}:\text{NEt}_3$  5:2 azeotrope (67 mg, 0.775 mmol, 5.0 equiv). Flash chromatography provided  $\gamma$ -butyrolactone **2h** (59 mg, 0.136 mmol, 88% yield) as a white solid. Analytical data for **2j**:  $^1\text{H NMR}$  (400 MHz,  $\text{CDCl}_3$ ):  $\delta$  8.11 (d,  $J = 8.4$  Hz, 1H), 7.57-7.55 (m, 1H), 7.44 (s, 1H), 7.37-7.30 (m, 2H), 5.35 (d,  $J = 8.4$  Hz, 1H), 4.70 (dd,  $J = 11.6, 8.4$  Hz, 1H), 4.24 (d,  $J = 11.6$ , 1H), 3.85-3.80 (m, 2H), 3.82 (s, 3H), 0.69 (t,  $J = 6.8$  Hz, 3H);  $^{13}\text{C NMR}$  (100 MHz,  $\text{CDCl}_3$ ):  $\delta$  170.1, 167.9, 167.2, 149.2, 135.4, 129.0, 125.3, 123.2, 123.0, 118.9, 115.4, 113.5, 84.5, 77.9, 61.7, 53.4, 48.8, 40.0, 28.1, 13.2; **IR** (thin film,  $\text{cm}^{-1}$ ): 2979, 1800, 1739, 1454, 1375, 1338, 1310, 1273, 1258, 1220, 1155, 1078, 1018, 857, 840, 763, 748; **m.p.** 84-85  $^\circ\text{C}$ ; **TLC** (30% EtOAc/hexanes):  $R_f$ : 0.4; **LRMS** (ESI): Calculated for  $[\text{M}+\text{H}]^+$   $\text{C}_{22}\text{H}_{26}\text{NO}_8$ : 432.17, Found: 432.18; **HPLC Analysis**: Chiralpak IB, 10%  $i$ -PrOH/hexanes, constant flow at 1.0 mL/min, 210 nm;  $t_{\text{minor}} = 11.7$  min  $t_{\text{major}} = 12.6$  min, 96:4 er;  $[\alpha]_{\text{D}}^{25} -75.7$  ( $c = 2.3$ ,  $\text{CHCl}_3$ ).

### Large Scale Preparation of $\gamma$ -Butyrolactone 2g

To a flame-dried 250-mL round-bottomed flask were added  $[\text{RuCl}_2(p\text{-cymene})]_2$  (83.6 mg, 0.137 mmol, 0.005 equiv), **L8** (330 mg, 0.546 mmol, 0.020 equiv) and 50 mL of DMF. The mixture was heated at 70  $^\circ\text{C}$  under nitrogen for 45 min and cooled to ambient temperature. A solution of  $\beta$ -aryl  $\alpha$ -keto ester **1g** (10.0 g, 27.3 mmol, 1.0 equiv) in 20 mL DMF was added via syringe and the reaction mixture was further diluted with 66 mL DMF. Formic acid:triethylamine 5:2 azeotrope (11.8 g, 136.5 mmol, 5.0 equiv) was added in a single portion and the reaction was heated at 70  $^\circ\text{C}$  for 16 h, at which point the reaction was cooled to ambient temperature and diluted with ethyl acetate and water. The aqueous layer was extracted with ethyl acetate (x2) and the combined organics were washed with water (x3) followed by brine (x1), dried over sodium sulfate and concentrated *in vacuo*. A 150-mL frit funnel (7 cm diameter) was charged with silica gel (4 cm in height). The crude reaction mixture was dissolved in the minimum amount of dichloromethane and passed through the pad of silica gel using 150 mL of 30% EtOAc/hexanes; the filtrate was concentrated *in vacuo*. The resultant residue was dissolved in the minimum amount of diethyl ether. Hexanes were added until the solution became cloudy. This solution was stored in the freezer overnight. The crystals were collected by filtration to yield enantiopure **1g** (6.61 g, 19.6 mmol, 72% yield).

### Preparation of $\gamma$ -Butyrolactone 3a

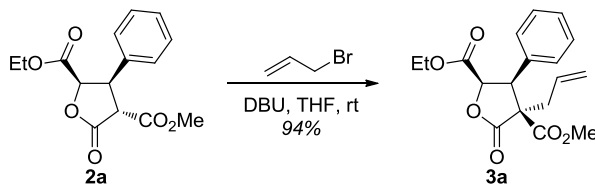

To a 1-dram vial equipped with a magnetic stir bar were added **2a** (29.2 mg, 0.100 mmol, 1.0 equiv), allyl bromide (24.2 mg, 0.200 mmol, 2.0 equiv) and THF (1 mL). DBU (30.4 mg, 0.200 mmol, 2.0

equiv) was added and the reaction was stirred at room temperature for 2 h and then diluted with water and ethyl acetate. The organic was washed with water followed by brine, dried over sodium sulfate and concentrated *in vacuo*. Flash chromatography provided **3a** (31.2 mg, 0.940 mmol, 94% yield) as a white solid. Analytical data for **3a**:  $^1\text{H NMR}$  (600 MHz,  $\text{CDCl}_3$ ):  $\delta$  7.25-7.24 (m, 3H), 7.15-7.13 (m, 2H), 5.90-5.85 (m, 1H), 5.35-5.30 (m, 2H), 5.22 (d,  $J = 7.2$  Hz, 1H), 3.91-3.81 (m, 2H), 3.89 (d,  $J = 7.2$  Hz, 1H), 3.22 (s, 3H), 2.97 (dd,  $J = 14.1, 7.2$  Hz, 1H), 2.85 (dd,  $J = 14.1, 7.2$  Hz, 1H), 0.83 (t,  $J = 7.2$  Hz, 3H);  $^{13}\text{C NMR}$  (150 MHz,  $\text{CDCl}_3$ ):  $\delta$  171.6, 167.6, 166.3, 134.8, 130.5, 128.6, 128.4, 128.2, 121.5, 77.3, 61.6, 60.4, 53.6, 52.1, 40.1, 13.5; **IR** (thin film,  $\text{cm}^{-1}$ ): 2921, 2359, 1797, 1759, 1740, 1436, 1221, 1168, 1125, 1087, 1028, 929, 705; **m.p.** 100-101.5  $^\circ\text{C}$ ; **TLC** (20% EtOAc/hexanes)  $R_f$ : 0.22; **LRMS** (ESI): Calculated for  $[\text{M}+\text{H}]^+$   $\text{C}_{18}\text{H}_{21}\text{O}_6$ : 333.13, Found: 333.16;  $[\alpha]_D^{25}$  -35.5 ( $c=6.5$ ,  $\text{CHCl}_3$ ).

### Preparation of $\gamma$ -Butyrolactone **3b**

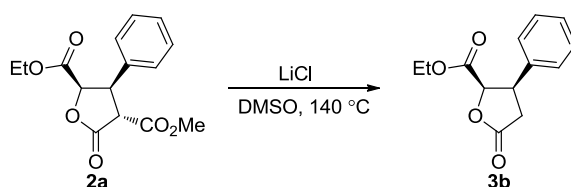

To a 1-dram vial equipped with a magnetic stir bar were added **2a** (45.0 mg, 0.155 mmol, 1.0 equiv), lithium chloride (71.0 mg, 0.310 mmol, 2.0 equiv), and DMSO (1 mL). The vial was fitted with a PTFE screw-cap and heated in an oil bath at 140  $^\circ\text{C}$  for 16 h, at which point the reaction was cooled to ambient temperature and diluted with water and ethyl acetate. The organic layer was washed with water (x2) followed by brine (x1), dried over sodium sulfate and concentrated *in vacuo*. Flash chromatography (20% EtOAc/hexanes) provided **3b** (31.2 mg, 0.133 mmol, 86% yield) as a colorless oil. Analytical data for **3b**:  $^1\text{H NMR}$  (400 MHz,  $\text{CDCl}_3$ ):  $\delta$  7.36-7.30 (m, 3H), 7.22-7.20 (m, 2H), 5.13 (d,  $J = 8.4$  Hz, 1H), 4.13-4.06 (m, 1H), 3.91-3.83 (m, 1H), 3.80-3.72 (m, 1H), 3.09 (dd,  $J = 17.2, 10$  Hz, 1H), 2.84 (dd,  $J = 17.2, 8.8$  Hz, 1H), 0.86 (t,  $J = 7.2$  Hz, 3H);  $^{13}\text{C NMR}$  (100 MHz,  $\text{CDCl}_3$ ):  $\delta$  175.2, 167.9, 134.9, 128.8, 128.3, 127.5, 80.1, 61.4, 44.1, 32.2, 13.5; **IR** (thin film,  $\text{cm}^{-1}$ ): 2985, 2359, 2342, 1793, 1742, 1498, 1455, 1381, 1214, 1151, 1094, 1074, 1051, 700, 544; **TLC** (20% EtOAc/hexanes)  $R_f$ : 0.19; **LRMS** (ESI): Calculated for  $[\text{M}+\text{H}]^+$   $\text{C}_{13}\text{H}_{15}\text{O}_4$ : 235.10, Found: 235.08;  $[\alpha]_D^{25}$  -68.4 ( $c=1.6$ ,  $\text{CHCl}_3$ ).

### Preparation of $\alpha$ -methylene $\gamma$ -Butyrolactone **3c**

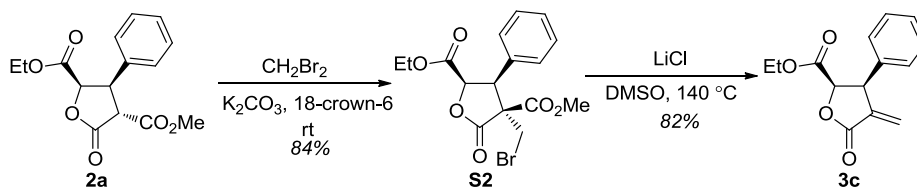

To a flame-dried 1-dram vial equipped with a magnetic stir bar were added **2a** (29.2 mg, 0.100 mmol, 1.0 equiv) and dibromomethane (0.125 mL). 18-crown-6 (1.30 mg, 0.005 mmol, 0.05 equiv) and potassium carbonate (35 mg, 0.25 mmol, 2.5 equiv) were added sequentially and the reaction was stirred at ambient temperature for 36 h. The reaction was diluted with water and ethyl acetate and the organic was washed with water followed by brine, dried over sodium sulfate and

concentrated *in vacuo*. Flash chromatography (30% EtOAc/hexanes) provided **S2** (32 mg, 0.084 mmol, 84% yield) as a white solid. Analytical data for **S2**:  $^1\text{H NMR}$  (400 MHz,  $\text{CDCl}_3$ ):  $\delta$  7.28-7.26 (m, 3H), 7.17-7.15 (m, 2H), 5.42 (d,  $J = 8.4$  Hz, 1H), 4.20 (d,  $J = 8.4$  Hz, 1H), 4.01 (d,  $J = 10.8$  Hz, 1H), 3.94 (d,  $J = 10.8$  Hz, 1H), 3.92-3.86 (m, 2H), 3.30 (s, 3H), 0.84 (t,  $J = 7.2$  Hz, 3H);  $^{13}\text{C NMR}$  (100 MHz,  $\text{CDCl}_3$ ):  $\delta$  170.3, 166.2, 134.2, 128.9, 128.7, 128.3, 78.2, 61.8, 61.6, 52.8, 52.7, 33.2, 13.5; **IR** (thin film,  $\text{cm}^{-1}$ ): 2360, 1795, 1751, 1736, 1232, 1146, 1086, 1041, 709; **m.p.** 161-162 °C; **TLC** (30% EtOAc/hexanes)  $R_f$  : 0.32; **LRMS** (ESI): Calculated for  $[\text{M}+\text{Na}]$   $\text{C}_{16}\text{H}_{17}\text{BrO}_6\text{Na}$ : 407.01, Found: 407.01;  $[\alpha]_D^{25} = -37.3$  ( $c = 2.0$ ,  $\text{CHCl}_3$ ).

To a 1-dram vial equipped with a magnetic stir bar were added **S2** (26 mg, 0.067 mmol, 1.0 equiv), lithium chloride (6.0 mg, 0.134 mmol, 2.0 equiv) and DMSO (1 mL). The vial was fitted with a PTFE screw-cap and heated in an oil bath at 140 °C for 16 h, at which point the reaction was cooled to ambient temperature and diluted with water and ethyl acetate. The organic was washed with water (x2) followed by brine (x1), dried over sodium sulfate and concentrated *in vacuo*. Flash chromatography (20% EtOAc/hexanes) provided **3c** (14 mg, 0.057 mmol, 85% yield) as a white solid. Analytical data for **3c**:  $^1\text{H NMR}$  (600 MHz,  $\text{CDCl}_3$ ):  $\delta$  7.33-7.30 (m, 3H), 7.21-7.19 (m, 2H), 6.54 (d,  $J = 3$  Hz, 1H), 5.63 (d,  $J = 3$  Hz, 1H), 5.18 (d,  $J = 9$  Hz, 1H), 4.62-4.59 (dt,  $J = 9.6, 3$  Hz, 1H), 3.85-3.80 (m, 1H), 3.68-3.63 (m, 1H), 0.84 (t,  $J = 7.2$  Hz, 3H);  $^{13}\text{C NMR}$  (100 MHz,  $\text{CDCl}_3$ ):  $\delta$  169.3, 167.7, 135.8, 135.3, 129.0, 128.8, 128.4, 125.1, 78.4, 61.5, 48.6, 13.5; **IR** (thin film,  $\text{cm}^{-1}$ ): 2983, 2359, 1780, 1747, 1402, 1188, 1095, 1067, 757, 702; **m.p.** 113-114 °C; **TLC** (20% EtOAc/hexanes)  $R_f$ : 0.25; **LRMS** (ESI): Calculated for  $[\text{M}+\text{H}]^+$   $\text{C}_{14}\text{H}_{15}\text{O}_4$ : 247.10, Found: 247.12;  $[\alpha]_D^{25} = -62.3$  ( $c = 2.2$ ,  $\text{CHCl}_3$ ).

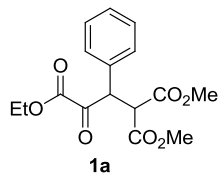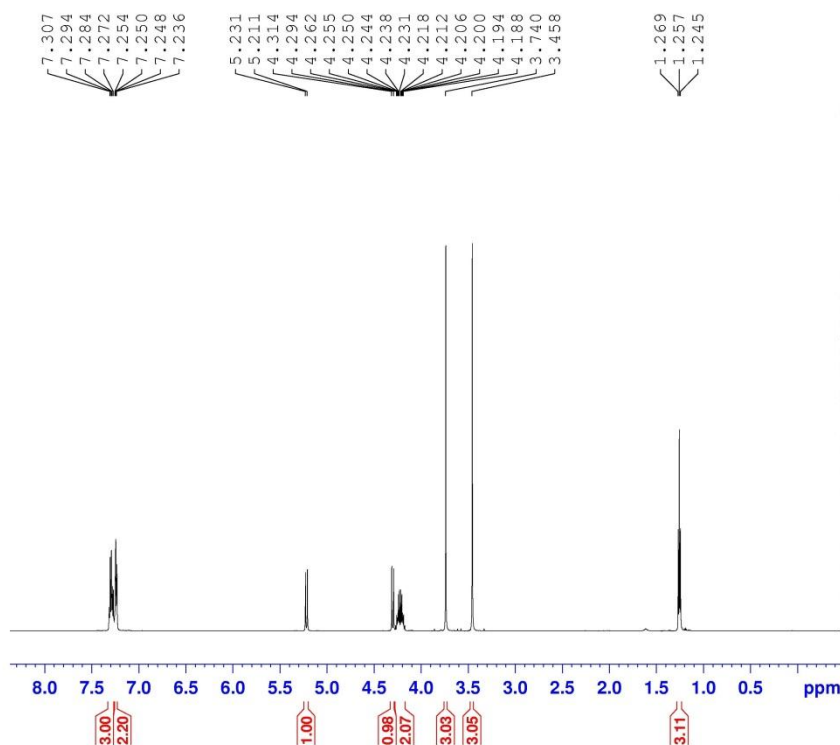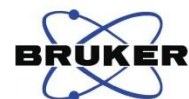

Current Data Parameters  
NAME 6KMS136  
EXPNO 1  
PROCNO 1

F2 - Acquisition Parameters  
Date\_ 20111209  
Time 11.18  
INSTRUM spect  
PROBHD 5 mm PABBO BB-  
PULPROG zg30  
TD 65536  
SOLVENT CDCl3  
NS 16  
DS 2  
SWH 12335.526 Hz  
FIDRES 0.188225 Hz  
AQ 2.6564426 sec  
RG 144  
DW 40.533 usec  
DE 6.50 usec  
TE 292.8 K  
D1 1.00000000 sec  
TD0 1

===== CHANNEL f1 =====  
NUC1 1H  
P1 13.60 usec  
PLW1 20.00000000 W  
SFO1 600.1337060 MHz

F2 - Processing parameters  
SI 65536  
SF 600.1300213 MHz  
WDW EM  
SSB 0  
LB 0.30 Hz  
GB 0  
PC 1.00

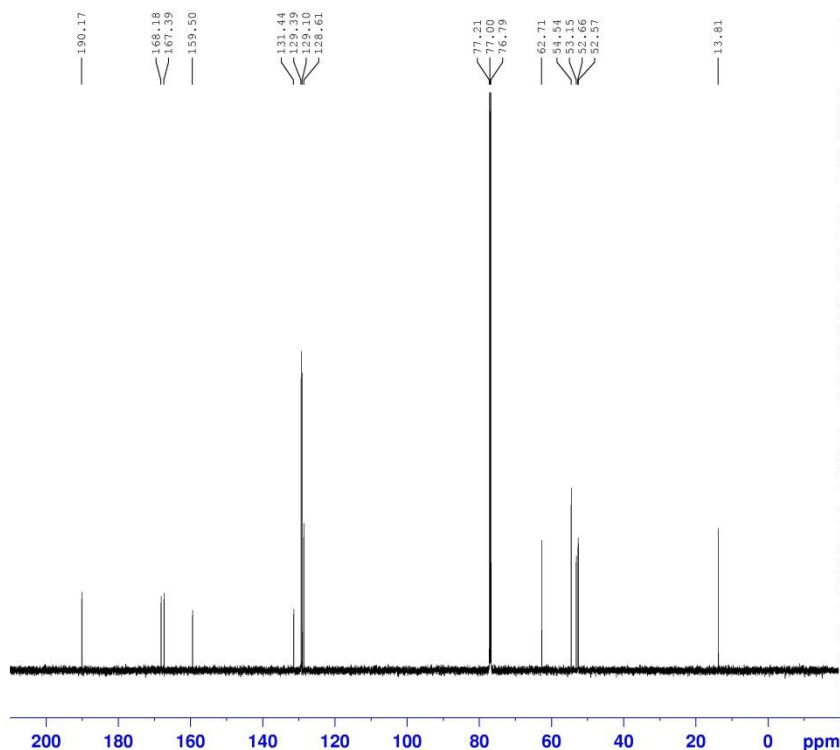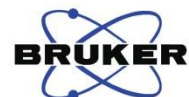

Current Data Parameters  
NAME 6KMS136  
EXPNO 2  
PROCNO 1

F2 - Acquisition Parameters  
Date\_ 20111209  
Time 11.25  
INSTRUM spect  
PROBHD 5 mm PABBO BB-  
PULPROG zgpg30  
TD 65536  
SOLVENT CDCl3  
NS 133  
DS 4  
SWH 36057.691 Hz  
FIDRES 0.550197 Hz  
AQ 0.9088159 sec  
RG 203  
DW 13.867 usec  
DE 10.00 usec  
TE 294.1 K  
D1 2.00000000 sec  
D11 0.03000000 sec  
TD0 1

===== CHANNEL f1 =====  
NUC1 13C  
P1 10.50 usec  
PLW1 110.00000000 W  
SFO1 150.9178981 MHz

===== CHANNEL f2 =====  
CPDPRG2 waltz16  
NUC2 1H  
PCPD2 70.00 usec  
PLW2 20.00000000 W  
PLW12 0.80000001 W  
PLW13 0.39199999 W  
SFO2 600.1324005 MHz

F2 - Processing parameters  
SI 32768  
SF 150.9028173 MHz  
WDW EM  
SSB 0  
LB 1.00 Hz  
GB 0  
PC 1.40

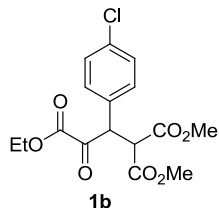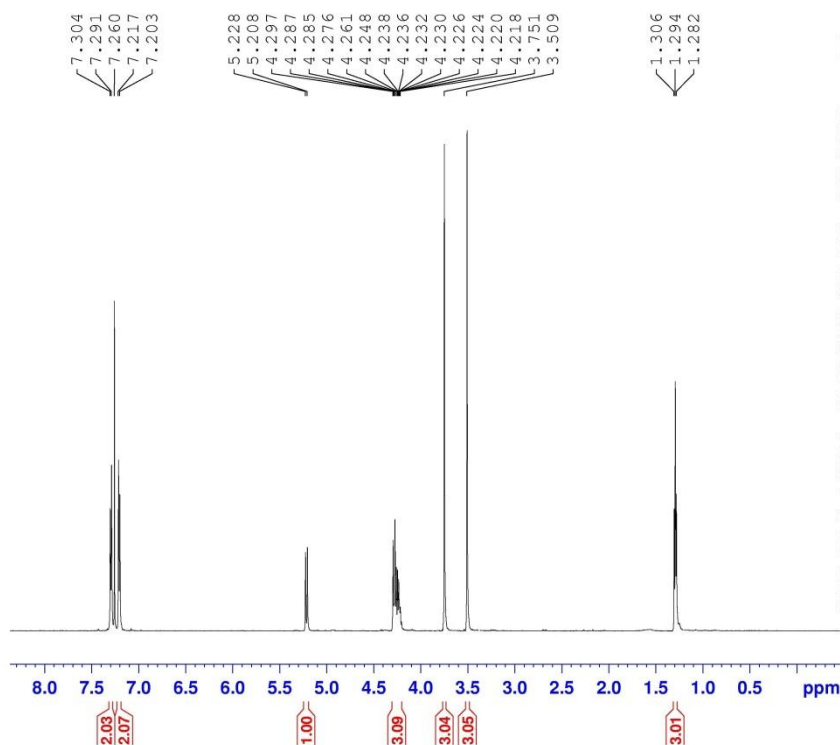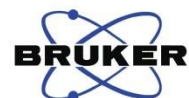

Current Data Parameters  
NAME 6KMS155  
EXPNO 1  
PROCNO 1

F2 - Acquisition Parameters  
Date\_ 20111209  
Time 11.35  
INSTRUM spect  
PROBHD 5 mm PABBO BB-  
PULPROG zg30  
TD 65536  
SOLVENT CDC13  
NS 16  
DS 2  
SWH 12335.526 Hz  
FIDRES 0.188225 Hz  
AQ 2.6564426 sec  
RG 203  
DW 40.533 usec  
DE 6.50 usec  
TE 292.9 K  
D1 1.00000000 sec  
TD0 1

===== CHANNEL f1 =====  
NUC1 1H  
P1 13.60 usec  
PLW1 20.00000000 W  
SFO1 600.1337060 MHz

F2 - Processing parameters  
SI 65536  
SF 600.1300179 MHz  
WDW EM  
SSB 0  
LB 0.30 Hz  
GB 0  
PC 1.00

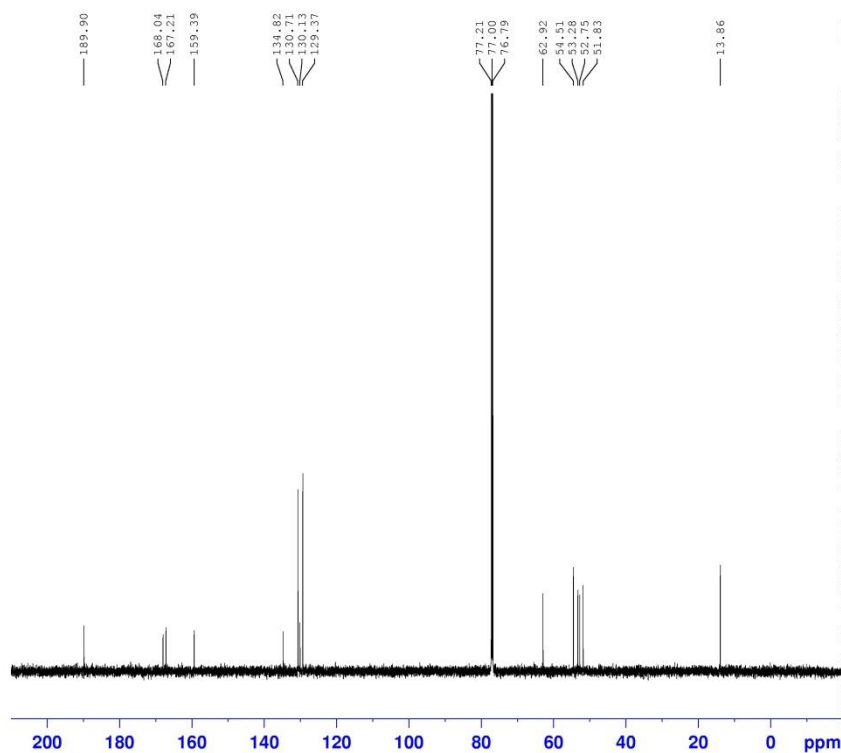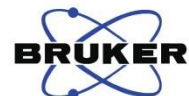

Current Data Parameters  
NAME 6KMS155  
EXPNO 2  
PROCNO 1

F2 - Acquisition Parameters  
Date\_ 20111209  
Time 11.42  
INSTRUM spect  
PROBHD 5 mm PABBO BB-  
PULPROG zgpg30  
TD 65536  
SOLVENT CDC13  
NS 451  
DS 4  
SWH 36057.691 Hz  
FIDRES 0.550197 Hz  
AQ 0.9088159 sec  
RG 203  
DW 13.867 usec  
DE 10.00 usec  
TE 294.1 K  
D1 2.00000000 sec  
D11 0.03000000 sec  
TD0 1

===== CHANNEL f1 =====  
NUC1 13C  
P1 10.50 usec  
PLW1 110.00000000 W  
SFO1 150.9178981 MHz

===== CHANNEL f2 =====  
CPDPRG2 waltz16  
NUC2 1H  
PCPD2 70.00 usec  
PLW2 20.00000000 W  
PLW12 0.80000001 W  
PLW13 0.39199999 W  
SFO2 600.1324005 MHz

F2 - Processing parameters  
SI 32768  
SF 150.9028140 MHz  
WDW EM  
SSB 0  
LB 1.00 Hz  
GB 0  
PC 1.40

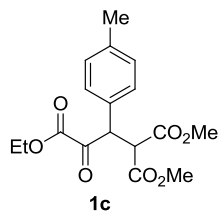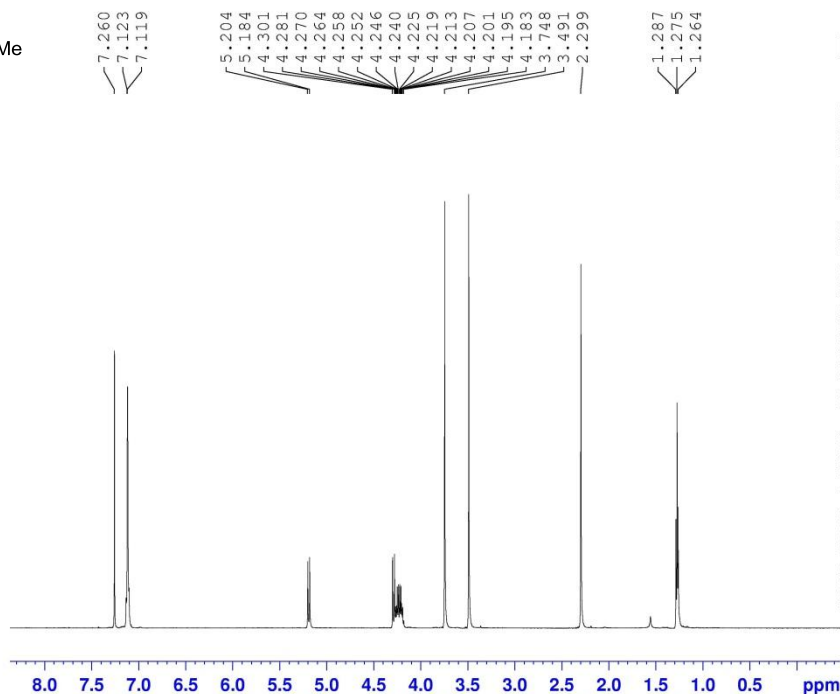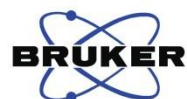

Current Data Parameters  
NAME 6KMS156  
EXPNO 1  
PROCNO 1

F2 - Acquisition Parameters  
Date\_ 20111209  
Time 13.45  
INSTRUM spect  
PROBHD 5 mm PABBO BB-  
PULPROG zg30  
TD 65536  
SOLVENT CDCl3  
NS 16  
DS 2  
SWH 12335.526 Hz  
FIDRES 0.188225 Hz  
AQ 2.6564426 sec  
RG 203  
DW 40.533 usec  
DE 6.50 usec  
TE 292.8 K  
D1 1.00000000 sec  
TD0 1

===== CHANNEL f1 =====  
NUC1 1H  
P1 13.60 usec  
PLW1 20.00000000 W  
SFO1 600.1337060 MHz

F2 - Processing parameters  
SI 65536  
SF 600.1300179 MHz  
WDW EM  
SSB 0  
LB 0.30 Hz  
GB 0  
PC 1.00

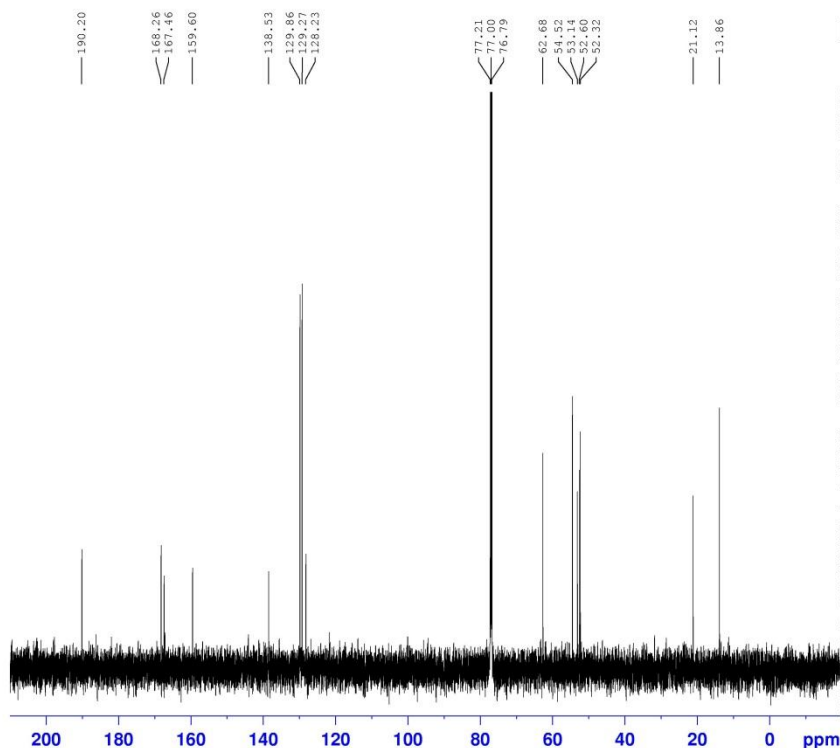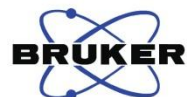

Current Data Parameters  
NAME 6KMS156  
EXPNO 2  
PROCNO 1

F2 - Acquisition Parameters  
Date\_ 20111209  
Time 13.56  
INSTRUM spect  
PROBHD 5 mm PABBO BB-  
PULPROG zgpg30  
TD 65536  
SOLVENT CDCl3  
NS 353  
DS 4  
SWH 36057.691 Hz  
FIDRES 0.550197 Hz  
AQ 0.9088159 sec  
RG 203  
DW 13.867 usec  
DE 10.00 usec  
TE 294.4 K  
D1 2.00000000 sec  
D11 0.03000000 sec  
TD0 1

===== CHANNEL f1 =====  
NUC1 13C  
P1 10.50 usec  
PLW1 110.00000000 W  
SFO1 150.9178981 MHz

===== CHANNEL f2 =====  
CPDPRG2 waltz16  
NUC2 1H  
PCPD2 70.00 usec  
PLW2 20.00000000 W  
PLW12 0.80000001 W  
PLW13 0.39199999 W  
SFO2 600.1324005 MHz

F2 - Processing parameters  
SI 32768  
SF 150.9028140 MHz  
WDW EM  
SSB 0  
LB 1.00 Hz  
GB 0  
PC 1.40

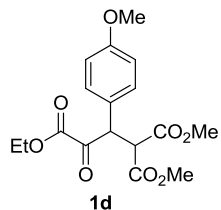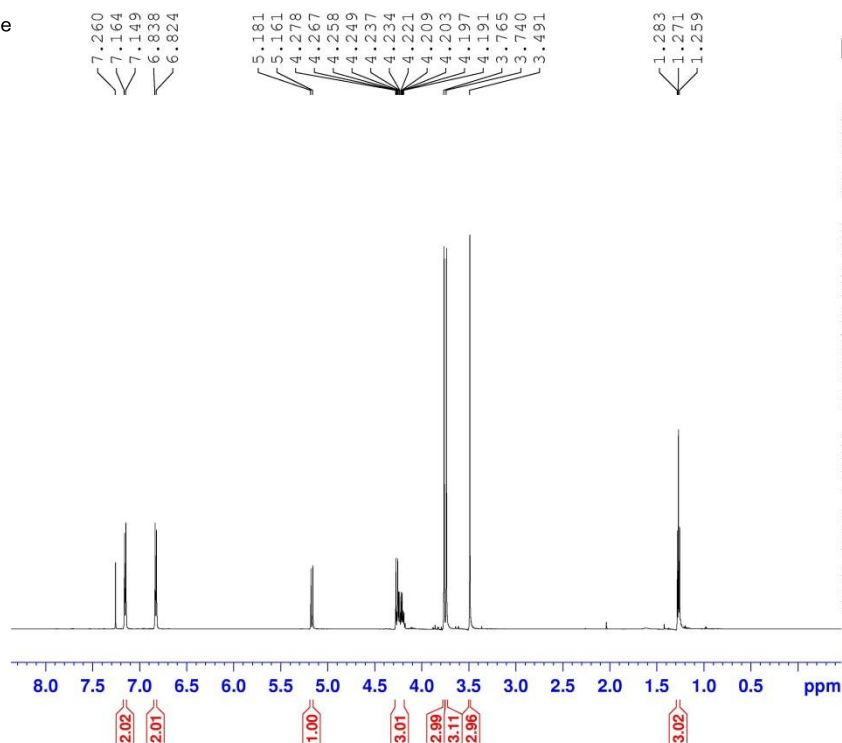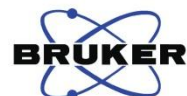

Current Data Parameters  
NAME 6KMS107  
EXPNO 1  
PROCNO 1

F2 - Acquisition Parameters  
Date\_ 20111210  
Time 15.17  
INSTRUM spect  
PROBHD 5 mm PABBO BB-  
PULPROG zg30  
TD 65536  
SOLVENT CDCl3  
NS 16  
DS 2  
SWH 12335.526 Hz  
FIDRES 0.188225 Hz  
AQ 2.6564426 sec  
RG 161  
DW 40.533 usec  
DE 6.50 usec  
TE 292.9 K  
D1 1.00000000 sec  
TD0 1

===== CHANNEL f1 =====  
NUC1 1H  
P1 13.60 usec  
PLW1 20.00000000 W  
SFO1 600.1337060 MHz

F2 - Processing parameters  
SI 65536  
SF 600.1300178 MHz  
WDW EM  
SSB 0  
LB 0.30 Hz  
GB 0  
PC 1.00

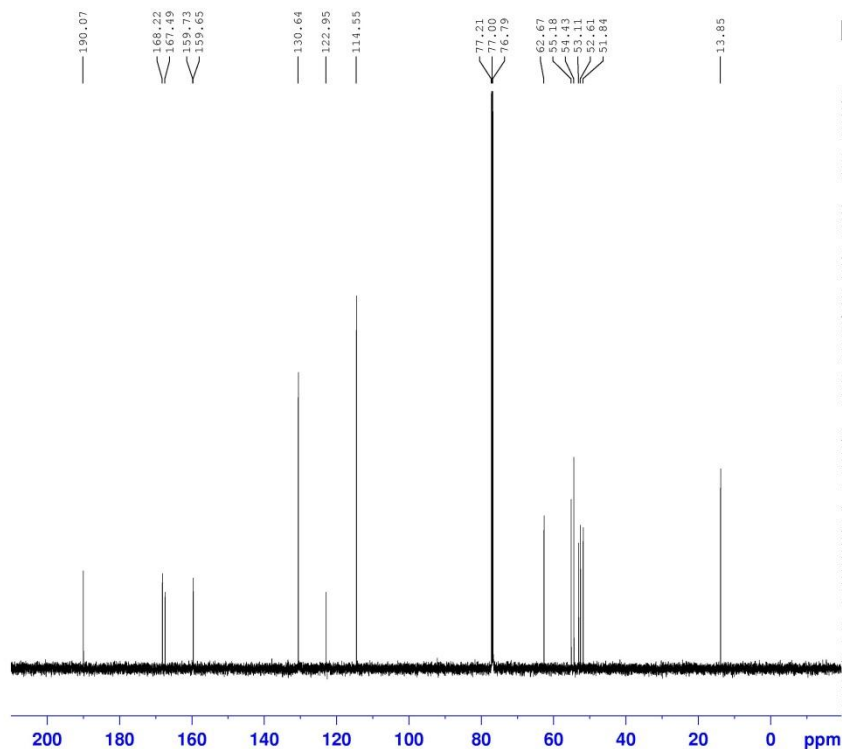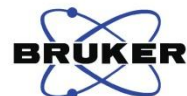

Current Data Parameters  
NAME 6KMS107  
EXPNO 2  
PROCNO 1

F2 - Acquisition Parameters  
Date\_ 20111210  
Time 15.25  
INSTRUM spect  
PROBHD 5 mm PABBO BB-  
PULPROG zgpg30  
TD 65536  
SOLVENT CDCl3  
NS 123  
DS 4  
SWH 36057.691 Hz  
FIDRES 0.550197 Hz  
AQ 0.9088159 sec  
RG 203  
DW 13.867 usec  
DE 10.00 usec  
TE 294.1 K  
D1 2.00000000 sec  
D11 0.03000000 sec  
TD0 1

===== CHANNEL f1 =====  
NUC1 13C  
P1 10.50 usec  
PLW1 110.00000000 W  
SFO1 150.9178981 MHz

===== CHANNEL f2 =====  
CPDPRG2 waltz16  
NUC2 1H  
PCPD2 70.00 usec  
PLW2 20.00000000 W  
PLW12 0.80000001 W  
PLW13 0.39199999 W  
SFO2 600.1324005 MHz

F2 - Processing parameters  
SI 32768  
SF 150.9028162 MHz  
WDW EM  
SSB 0  
LB 1.00 Hz  
GB 0  
PC 1.40

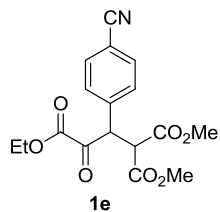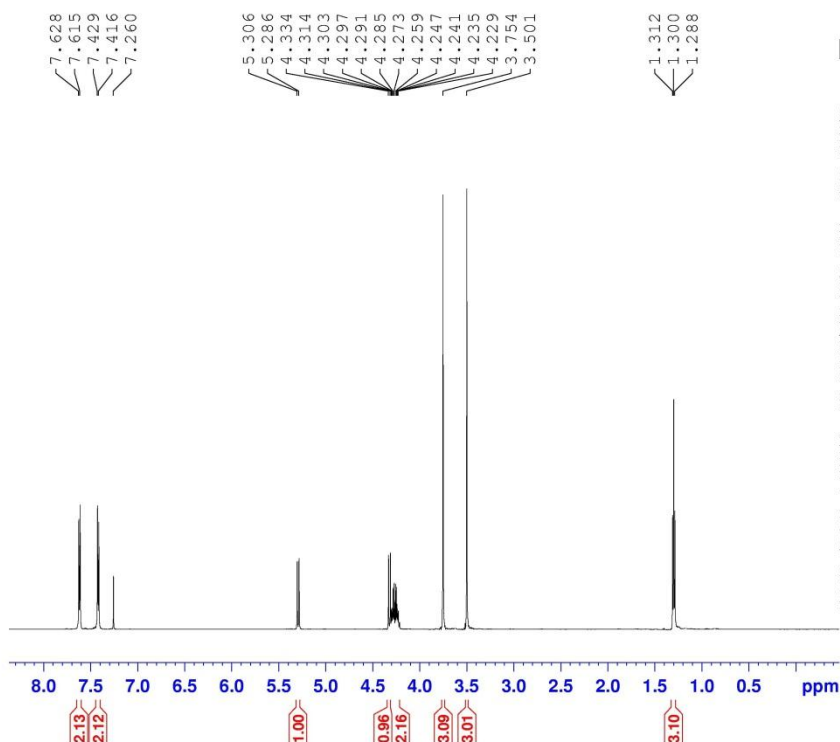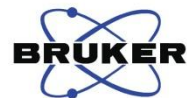

Current Data Parameters  
NAME 6KMS204  
EXPNO 1  
PROCNO 1

F2 - Acquisition Parameters  
Date\_ 20111210  
Time 15.03  
INSTRUM spect  
PROBHD 5 mm PABBO BB-  
PULPROG zg30  
TD 65536  
SOLVENT CDCl3  
NS 16  
DS 2  
SWH 12335.526 Hz  
FIDRES 0.188225 Hz  
AQ 2.6564426 sec  
RG 181  
DW 40.533 usec  
DE 6.50 usec  
TE 292.6 K  
D1 1.00000000 sec  
TDO 1

CHANNEL f1  
NUC1 1H  
P1 13.60 usec  
PLW1 20.00000000 W  
SFO1 600.1337060 MHz

F2 - Processing parameters  
SI 65536  
SF 600.1300177 MHz  
WDW EM  
SSB 0  
LB 0.30 Hz  
GB 0  
PC 1.00

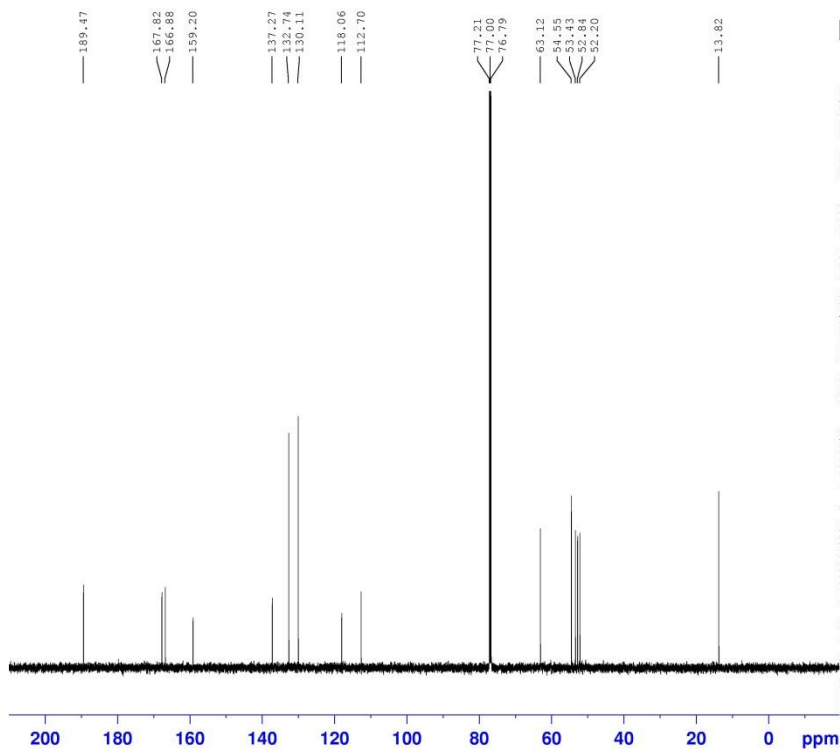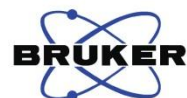

Current Data Parameters  
NAME 6KMS204  
EXPNO 2  
PROCNO 1

F2 - Acquisition Parameters  
Date\_ 20111210  
Time 15.12  
INSTRUM spect  
PROBHD 5 mm PABBO BB-  
PULPROG zgpg30  
TD 65536  
SOLVENT CDCl3  
NS 139  
DS 4  
SWH 36057.691 Hz  
FIDRES 0.550197 Hz  
AQ 0.9088159 sec  
RG 203  
DW 13.867 usec  
DE 10.00 usec  
TE 294.1 K  
D1 2.00000000 sec  
D11 0.03000000 sec  
TDO 1

CHANNEL f1  
NUC1 13C  
P1 10.50 usec  
PLW1 110.00000000 W  
SFO1 150.9178981 MHz

CHANNEL f2  
CPDPRG2 waltz16  
NUC2 1H  
PCPD2 70.00 usec  
PLW2 20.00000000 W  
PLW12 0.80000001 W  
PLW13 0.39199999 W  
SFO2 600.1324005 MHz

F2 - Processing parameters  
SI 32768  
SF 150.9028183 MHz  
WDW EM  
SSB 0  
LB 1.00 Hz  
GB 0  
PC 1.40

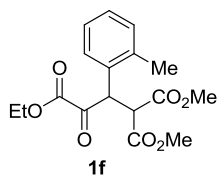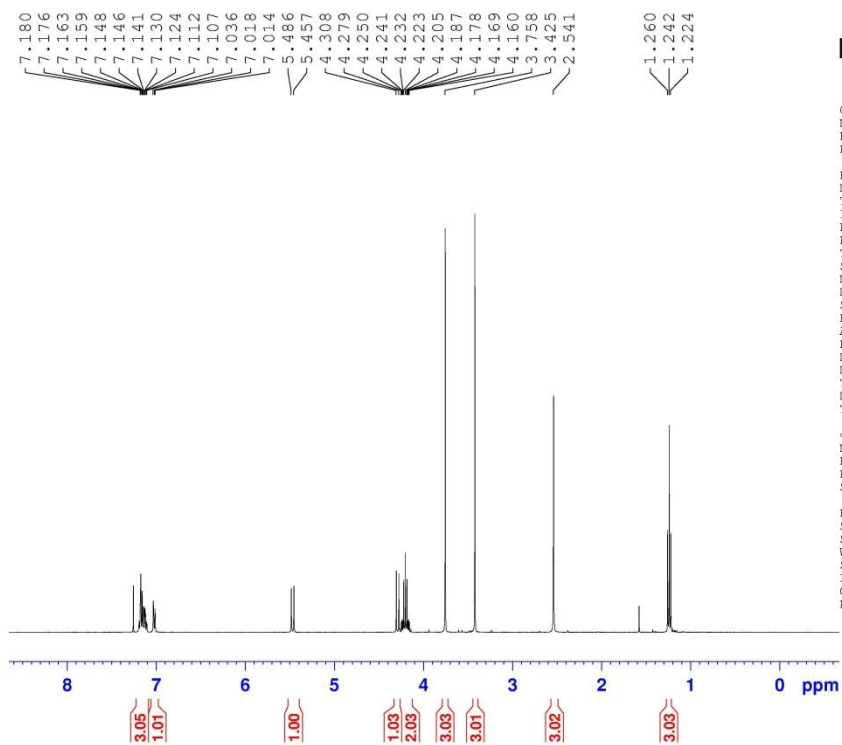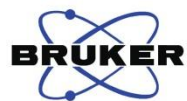

Current Data Parameters  
NAME 6KMS269  
EXPNO 1  
PROCNO 1

F2 - Acquisition Parameters  
Date\_ 20120302  
Time 17.28  
INSTRUM spect  
PROBHD 5 mm PABBO BB-  
PULPROG zg30  
TD 65536  
SOLVENT CDCl3  
NS 16  
DS 2  
SWH 8223.685 Hz  
FIDRES 0.125483 Hz  
AQ 3.9846387 sec  
RG 97.5  
DW 60.800 usec  
DE 6.50 usec  
TE 297.2 K  
D1 1.00000000 sec  
TD0 1

===== CHANNEL f1 =====  
NUC1 1H  
P1 12.38 usec  
PLW1 11.19999981 W  
SFO1 400.0924707 MHz

F2 - Processing parameters  
SI 65536  
SF 400.0900112 MHz  
WDW EM  
SSB 0  
LB 0.30 Hz  
GB 0  
PC 1.00

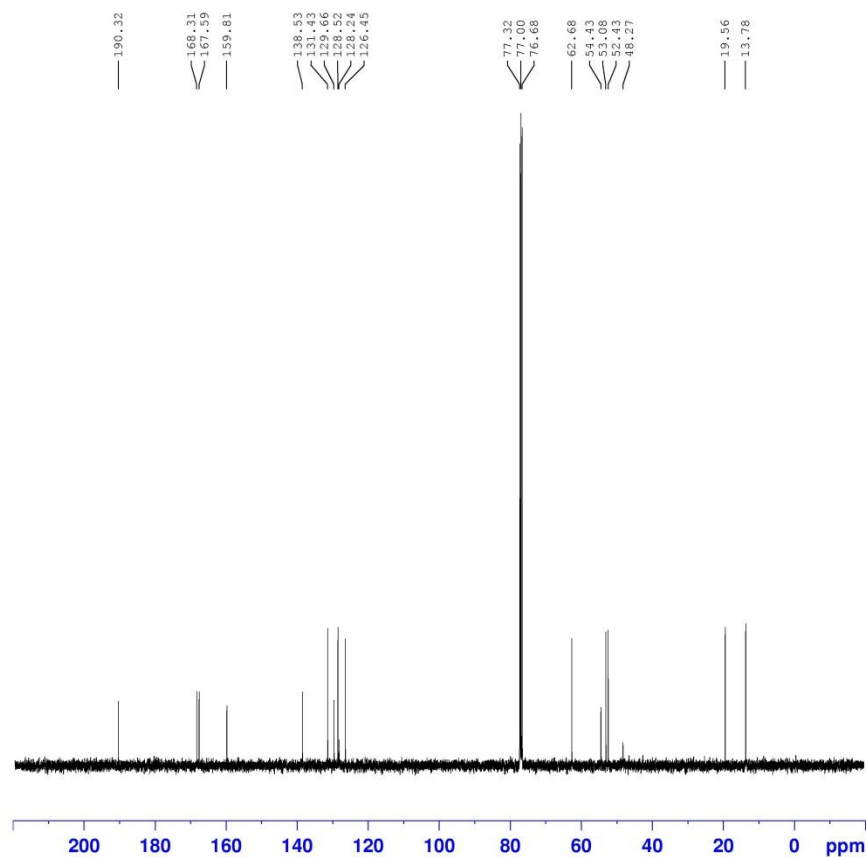

Current Data Parameters  
NAME 6KMS269  
EXPNO 2  
PROCNO 1

F2 - Acquisition Parameter  
Date\_ 20120302  
Time 17.34  
INSTRUM spect  
PROBHD 5 mm PABBO BB-  
PULPROG zgpg30  
TD 65536  
SOLVENT CDCl3  
NS 221  
DS 4  
SWH 24038.461 Hz  
FIDRES 0.366798 Hz  
AQ 1.3631988 sec  
RG 200.09  
DW 20.800 us  
DE 6.50 us  
TE 298.1 K  
D1 2.00000000 sec  
D11 0.03000000 sec  
TD0 1

===== CHANNEL f1 =====  
NUC1 13C  
P1 7.50 us  
PLW1 61.20000076 W  
SFO1 100.6127703 MHz

===== CHANNEL f2 =====  
CPDPRG2 waltz16  
NUC2 1H  
PCPD2 80.00 us  
PLW2 11.19999981 W  
PLW12 0.26820999 W  
PLW13 0.17160001 W  
SFO2 400.0916004 MHz

F2 - Processing parameters  
SI 32768  
SF 100.6027142 MHz  
WDW EM  
SSB 0  
LB 1.00 Hz  
GB 0  
PC 1.40

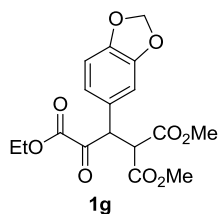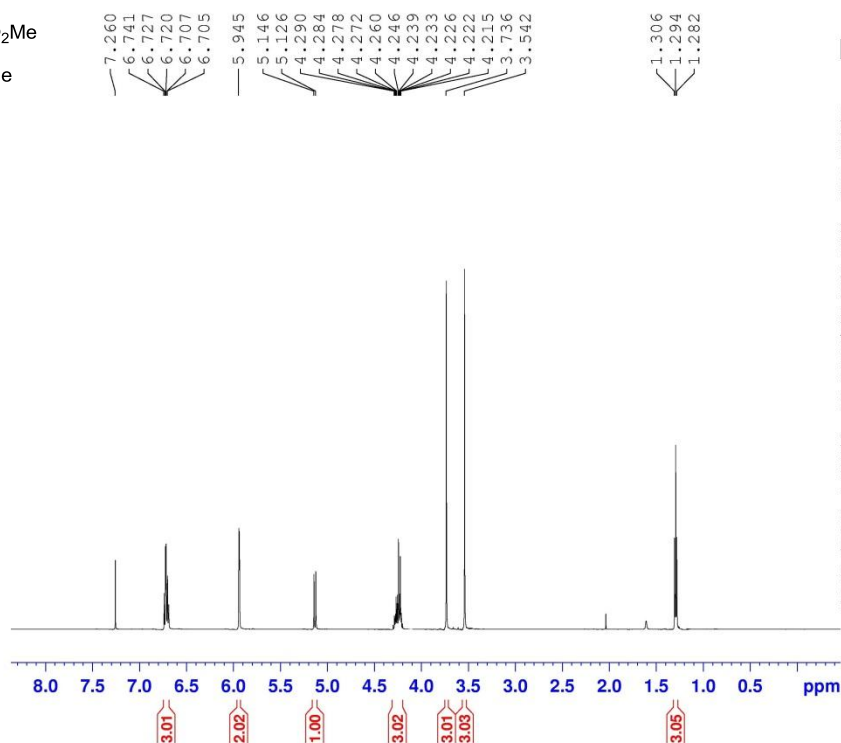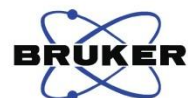

Current Data Parameters  
NAME 6KMS260  
EXPNO 1  
PROCNO 1

F2 - Acquisition Parameters  
Date\_ 20120130  
Time 12.12  
INSTRUM spect  
PROBHD 5 mm PABBO BB-  
PULPROG zg30  
TD 65536  
SOLVENT CDCl3  
NS 16  
DS 2  
SWH 12335.526 Hz  
FIDRES 0.188225 Hz  
AQ 2.6564426 sec  
RG 203  
DW 40.533 usec  
DE 6.50 usec  
TE 292.8 K  
D1 1.00000000 sec  
TD0 1

===== CHANNEL f1 =====  
NUC1 1H  
P1 13.60 usec  
PLW1 20.00000000 W  
SFO1 600.1337060 MHz

F2 - Processing parameters  
SI 65536  
SF 600.1300178 MHz  
WDW EM  
SSB 0  
LB 0.30 Hz  
GB 0  
PC 1.00

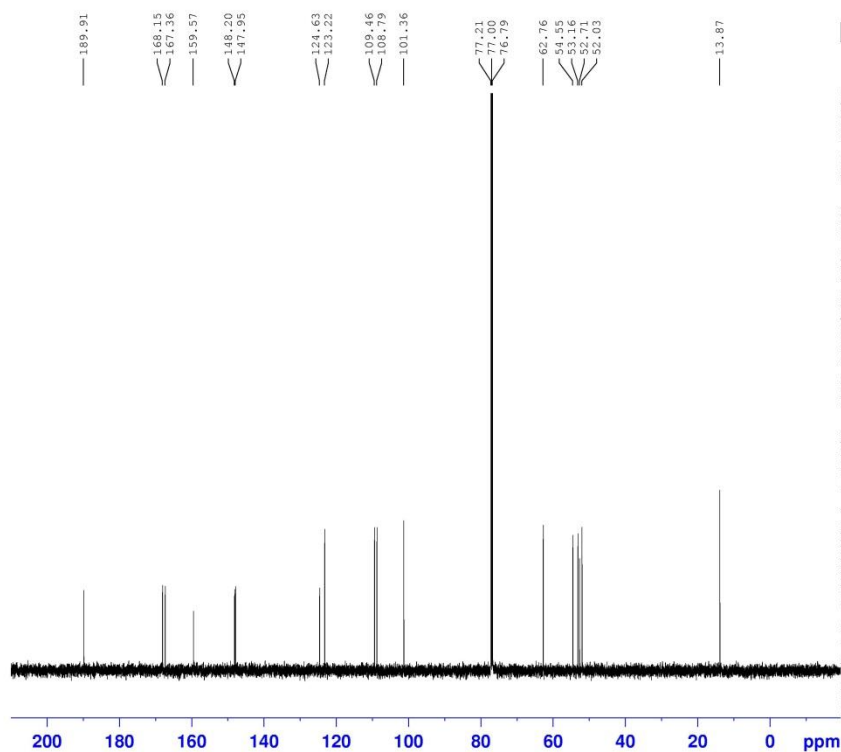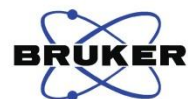

Current Data Parameters  
NAME 6KMS260  
EXPNO 3  
PROCNO 1

F2 - Acquisition Parameters  
Date\_ 20120130  
Time 12.19  
INSTRUM spect  
PROBHD 5 mm PABBO BB-  
PULPROG zgpg30  
TD 65536  
SOLVENT CDCl3  
NS 102  
DS 4  
SWH 36057.691 Hz  
FIDRES 0.550197 Hz  
AQ 0.9088159 sec  
RG 203  
DW 13.867 usec  
DE 10.00 usec  
TE 293.7 K  
D1 2.00000000 sec  
D11 0.03000000 sec  
TD0 1

===== CHANNEL f1 =====  
NUC1 13C  
P1 10.50 usec  
PLW1 110.00000000 W  
SFO1 150.9178981 MHz

===== CHANNEL f2 =====  
CPDPRG2 waltz16  
NUC2 1H  
PCPD2 70.00 usec  
PLW2 20.00000000 W  
PLW12 0.80000001 W  
PLW13 0.39199999 W  
SFO2 600.1324005 MHz

F2 - Processing parameters  
SI 32768  
SF 150.9028162 MHz  
WDW EM  
SSB 0  
LB 1.00 Hz  
GB 0  
PC 1.40

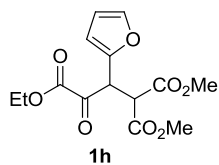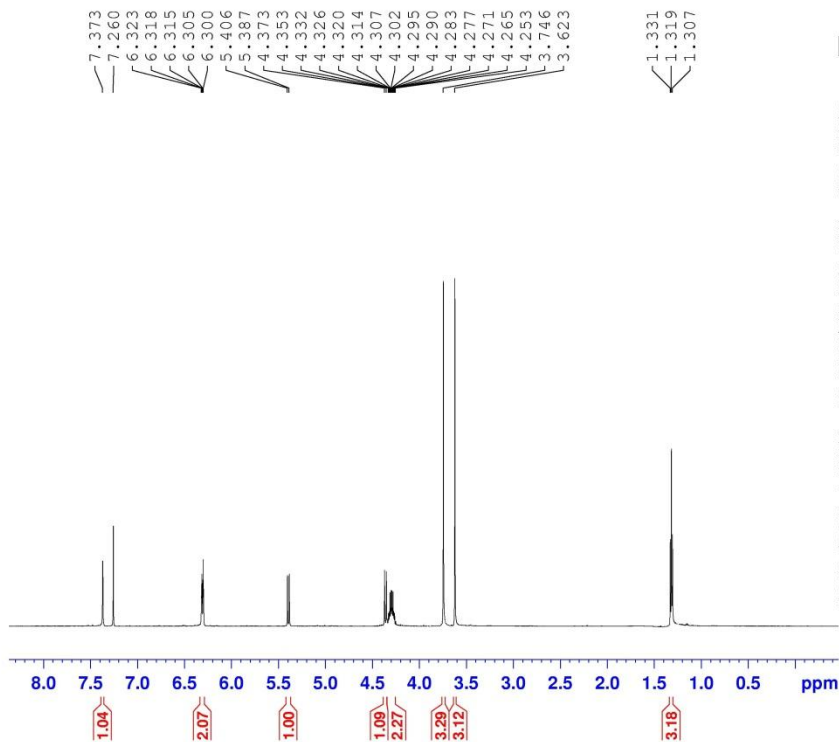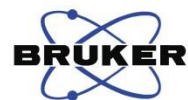

Current Data Parameters  
NAME 6KMS205  
EXPNO 1  
PROCNO 1

F2 - Acquisition Parameters  
Date\_ 20111212  
Time 14.10  
INSTRUM spect  
PROBHD 5 mm PABBO BB-  
PULPROG zg30  
TD 65536  
SOLVENT CDCl3  
NS 16  
DS 2  
SWH 12335.526 Hz  
FIDRES 0.188225 Hz  
AQ 2.6564426 sec  
RG 203  
DW 40.533 usec  
DE 6.50 usec  
TE 292.7 K  
D1 1.00000000 sec  
TD0 1

===== CHANNEL f1 =====  
NUC1 1H  
P1 13.60 usec  
PLW1 20.00000000 W  
SFO1 600.1337060 MHz

F2 - Processing parameters  
SI 65536  
SF 600.1300177 MHz  
WDW EM  
SSB 0  
LB 0.30 Hz  
GB 0  
PC 1.00

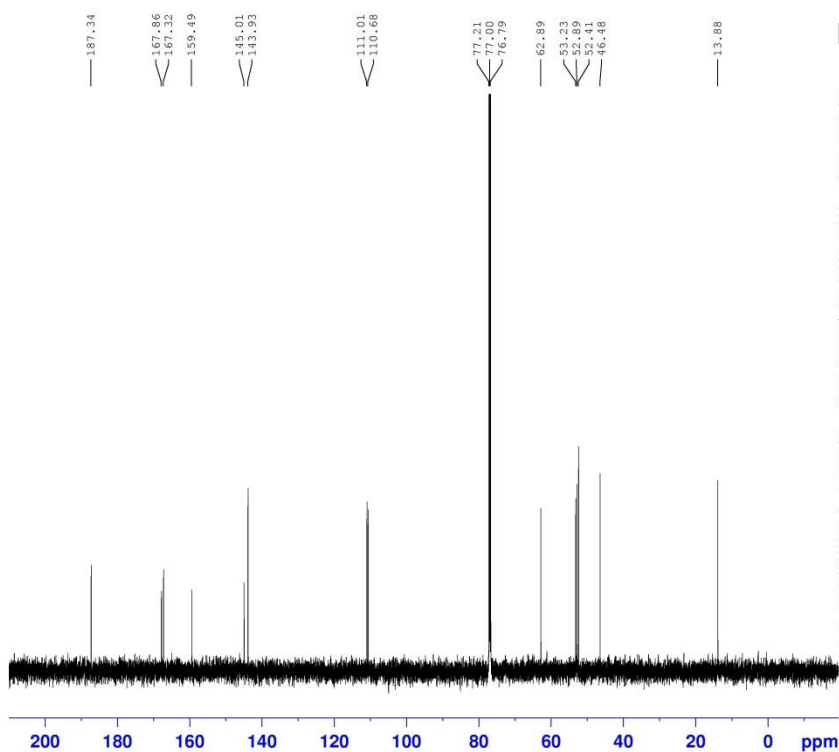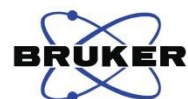

Current Data Parameters  
NAME 6KMS205  
EXPNO 2  
PROCNO 1

F2 - Acquisition Parameters  
Date\_ 20111212  
Time 14.17  
INSTRUM spect  
PROBHD 5 mm PABBO BB-  
PULPROG zgpg30  
TD 65536  
SOLVENT CDCl3  
NS 230  
DS 4  
SWH 36057.691 Hz  
FIDRES 0.550197 Hz  
AQ 0.9088159 sec  
RG 203  
DW 13.867 usec  
DE 10.00 usec  
TE 294.0 K  
D1 2.00000000 sec  
D11 0.03000000 sec  
TD0 1

===== CHANNEL f1 =====  
NUC1 13C  
P1 10.50 usec  
PLW1 110.00000000 W  
SFO1 150.9178981 MHz

===== CHANNEL f2 =====  
CPDPRG2 waltz16  
NUC2 1H  
PCPD2 70.00 usec  
PLW2 20.00000000 W  
PLW12 0.80000001 W  
PLW13 0.39199999 W  
SFO2 600.1324005 MHz

F2 - Processing parameters  
SI 32768  
SF 150.9028151 MHz  
WDW EM  
SSB 0  
LB 1.00 Hz  
GB 0  
PC 1.40

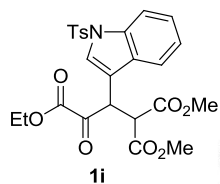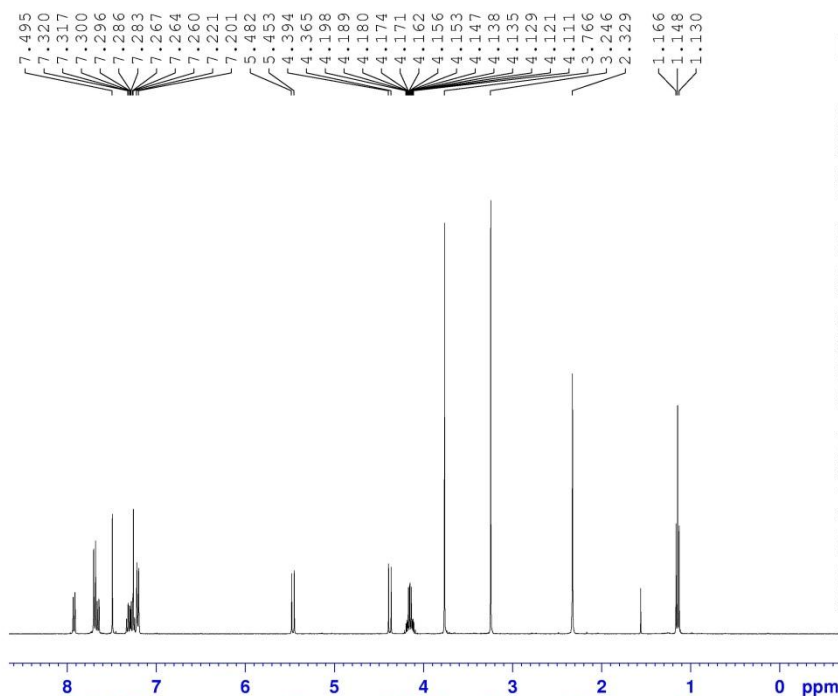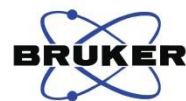

Current Data Parameters  
 NAME 7KMS14  
 EXPNO 1  
 PROCNO 1

F2 - Acquisition Parameters  
 Date\_ 20120302  
 Time 12.12  
 INSTRUM spect  
 PROBHD 5 mm PABBO BB-  
 PULPROG zg30  
 TD 65536  
 SOLVENT CDCl3  
 NS 16  
 DS 2  
 SWH 8223.685 Hz  
 FIDRES 0.125483 Hz  
 AQ 3.9846387 sec  
 RG 134.63  
 DW 60.800 usec  
 DE 6.50 usec  
 TE 297.1 K  
 D1 1.00000000 sec  
 TD0 1

===== CHANNEL f1 =====  
 NUC1 1H  
 P1 12.38 usec  
 PLW1 11.19999981 W  
 SFO1 400.0924707 MHz

F2 - Processing parameters  
 SI 65536  
 SF 400.0900114 MHz  
 WDW EM  
 SSB 0  
 LB 0.30 Hz  
 GB 0  
 PC 1.00

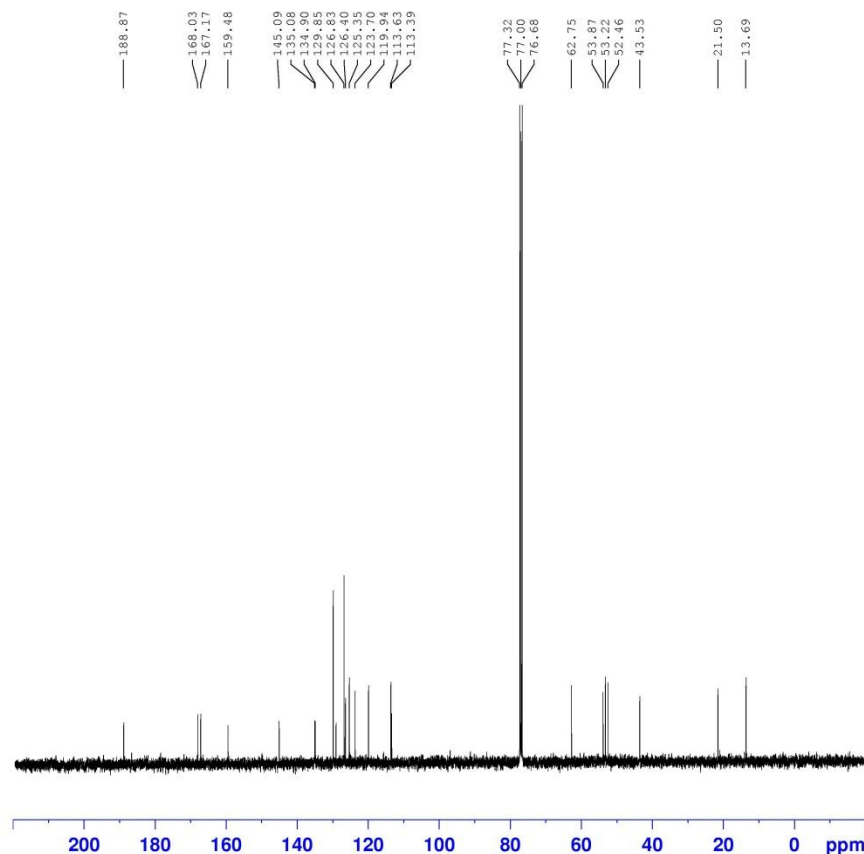

Current Data Parameters  
 NAME 7MS14  
 EXPNO 2  
 PROCNO 1

F2 - Acquisition Parameter  
 Date\_ 20120214  
 Time 15.35  
 INSTRUM spect  
 PROBHD 5 mm PABBO BB-  
 PULPROG zgpg30  
 TD 65536  
 SOLVENT CDCl3  
 NS 163  
 DS 4  
 SWH 24038.461 Hz  
 FIDRES 0.366798 Hz  
 AQ 1.3631988 sec  
 RG 200.09  
 DW 20.800 us  
 DE 6.50 us  
 TE 302.6 K  
 D1 2.00000000 sec  
 D11 0.03000000 sec  
 TD0 1

===== CHANNEL f1 =====  
 NUC1 13C  
 P1 7.50 us  
 PLW1 61.20000076 W  
 SFO1 100.6127703 MHz

===== CHANNEL f2 =====  
 CPDPRG2 waltz16  
 NUC2 1H  
 PCPD2 80.00 us  
 PLW2 11.19999981 W  
 PLW12 0.26820999 W  
 PLW13 0.17166001 W  
 SFO2 400.0916004 MHz

F2 - Processing parameters  
 SI 32768  
 SF 100.6027134 MHz  
 WDW EM  
 SSB 0  
 LB 1.00 Hz  
 GB 0  
 PC 1.40

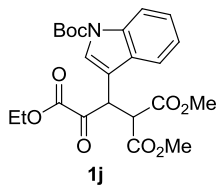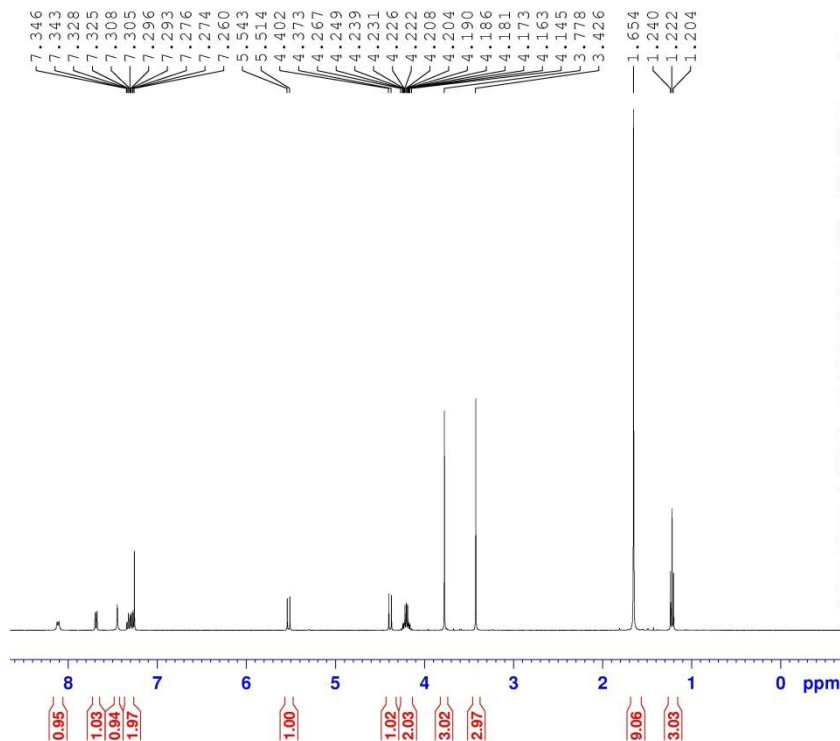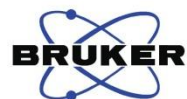

Current Data Parameters  
NAME 7RMS15  
EXPNO 1  
PROCNO 1  
F2 - Acquisition Parameters  
Date\_ 20120302  
Time 12.18  
INSTRUM spect  
PROBHD 5 mm PABBO BB-  
PULPROG zg30  
TD 65536  
SOLVENT CDCl3  
NS 16  
DS 2  
SWH 8223.685 Hz  
FIDRES 0.125483 Hz  
AQ 3.9846387 sec  
RG 134.63  
DW 60.800 usec  
DE 6.50 usec  
TE 297.1 K  
D1 1.00000000 sec  
TD0 1  
===== CHANNEL f1 =====  
NUC1 1H  
P1 12.38 usec  
PLW1 11.19999981 W  
SF01 400.0924707 MHz  
F2 - Processing parameters  
SI 65536  
SF 400.0900113 MHz  
WDW EM  
SSB 0  
LB 0.30 Hz  
GB 0  
PC 1.00

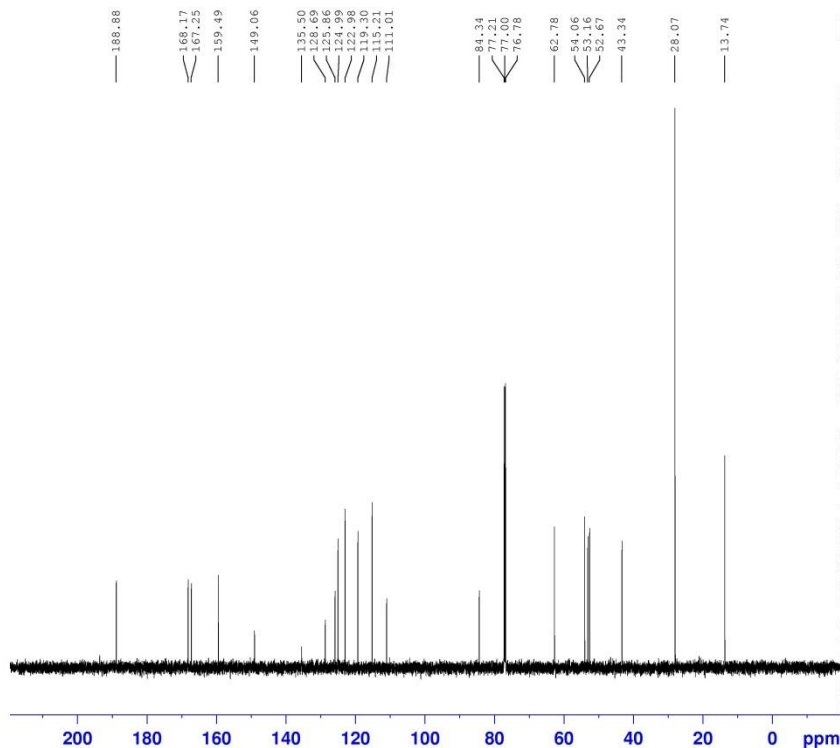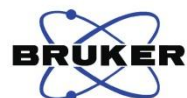

Current Data Parameters  
NAME 7RMS15  
EXPNO 3  
PROCNO 1  
F2 - Acquisition Parameters  
Date\_ 20120302  
Time 12.42  
INSTRUM spect  
PROBHD 5 mm PABBO BB-  
PULPROG zgpg30  
TD 65536  
SOLVENT CDCl3  
NS 80  
DS 4  
SWH 36057.691 Hz  
FIDRES 0.550197 Hz  
AQ 0.9088159 sec  
RG 203  
DW 13.867 usec  
DE 10.00 usec  
TE 294.8 K  
D1 2.00000000 sec  
D11 0.03000000 sec  
TD0 1  
===== CHANNEL f1 =====  
NUC1 13C  
P1 10.50 usec  
PLW1 110.00000000 W  
SF01 150.9178981 MHz  
===== CHANNEL f2 =====  
CPDPRG2 waltz16  
NUC2 1H  
PCPD2 70.00 usec  
PLW2 20.00000000 W  
PLW12 0.80000001 W  
PLW13 0.39199999 W  
SF02 600.1324005 MHz  
F2 - Processing parameters  
SI 32768  
SF 150.9028217 MHz  
WDW EM  
SSB 0  
LB 1.00 Hz  
GB 0  
PC 1.40

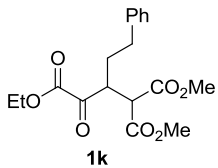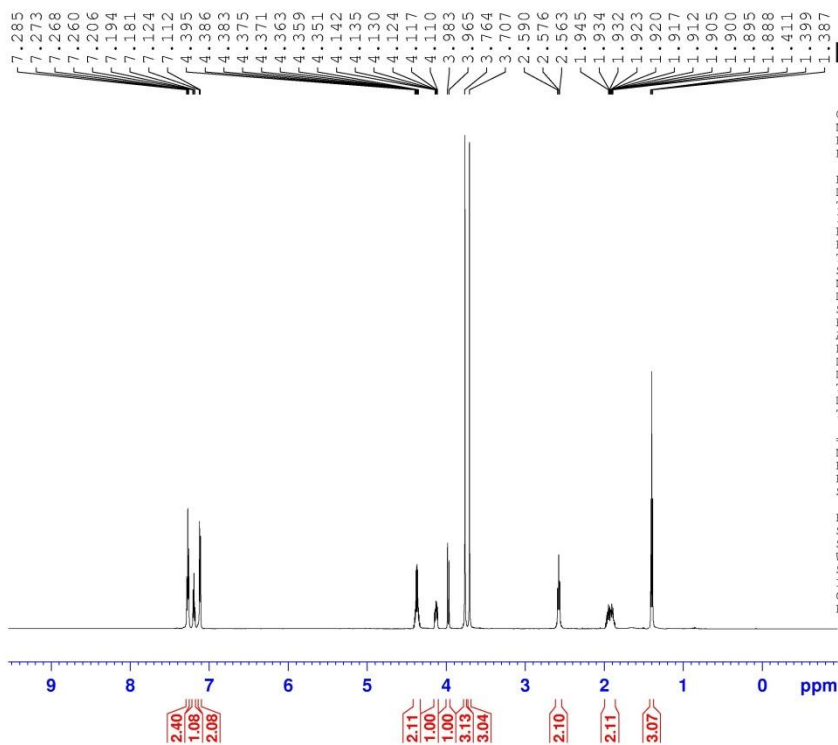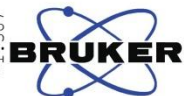

Current Data Parameters  
NAME 6KMS206  
EXPNO 1  
PROCNO 1

F2 - Acquisition Parameters  
Date\_ 20120406  
Time 15.59  
INSTRUM spect  
PROBHD 5 mm PABBO BB-  
PULPROG zg30  
TD 65536  
SOLVENT CDCl3  
NS 16  
DS 2  
SWH 12335.526 Hz  
FIDRES 0.188225 Hz  
AQ 2.6564426 sec  
RG 128  
DW 40.533 usec  
DE 6.50 usec  
TE 293.7 K  
D1 1.00000000 sec  
TD0 1

===== CHANNEL f1 =====  
NUC1 1H  
P1 13.60 usec  
PLW1 20.00000000 W  
SFO1 600.1337060 MHz

F2 - Processing parameters  
SI 65536  
SF 600.1300134 MHz  
WDW EM  
SSB 0  
LB 0.30 Hz  
GB 0  
PC 1.00

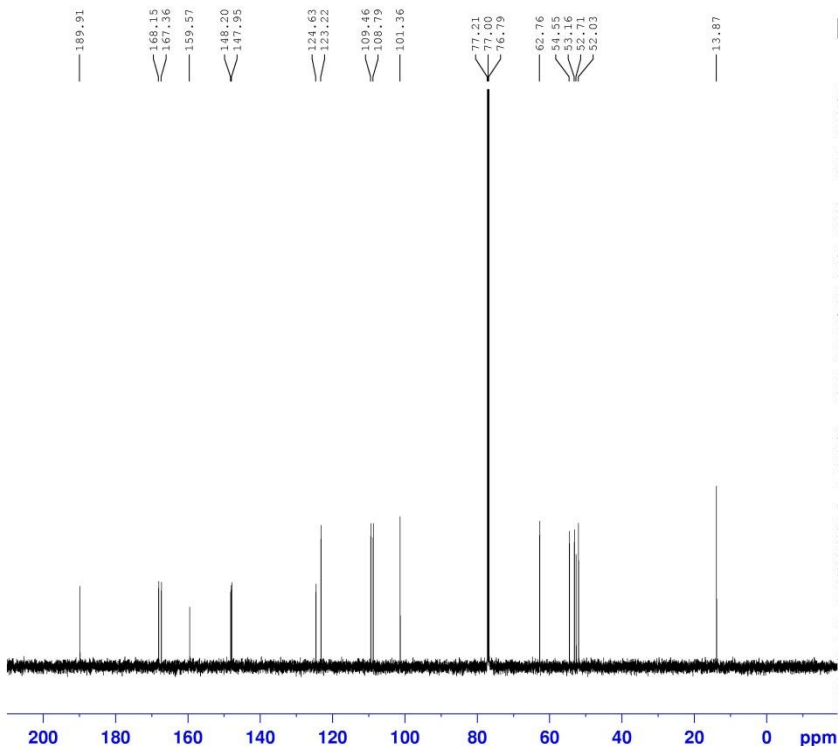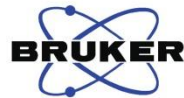

Current Data Parameters  
NAME 6KMS260  
EXPNO 3  
PROCNO 1

F2 - Acquisition Parameters  
Date\_ 20120130  
Time 12.19  
INSTRUM spect  
PROBHD 5 mm PABBO BB-  
PULPROG zgpg30  
TD 65536  
SOLVENT CDCl3  
NS 102  
DS 4  
SWH 36057.691 Hz  
FIDRES 0.550197 Hz  
AQ 0.9088159 sec  
RG 203  
DW 13.867 usec  
DE 10.00 usec  
TE 293.7 K  
D1 2.00000000 sec  
D11 0.03000000 sec  
TD0 1

===== CHANNEL f1 =====  
NUC1 13C  
P1 10.50 usec  
PLW1 110.00000000 W  
SFO1 150.9178981 MHz

===== CHANNEL f2 =====  
CPDPRG2 waltz16  
NUC2 1H  
PCPD2 70.00 usec  
PLW2 20.00000000 W  
PLW12 0.80000000 W  
PLW13 0.39199999 W  
SFO2 600.1324005 MHz

F2 - Processing parameters  
SI 32768  
SF 150.9028162 MHz  
WDW EM  
SSB 0  
LB 1.00 Hz  
GB 0  
PC 1.40

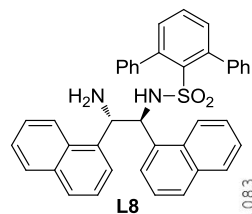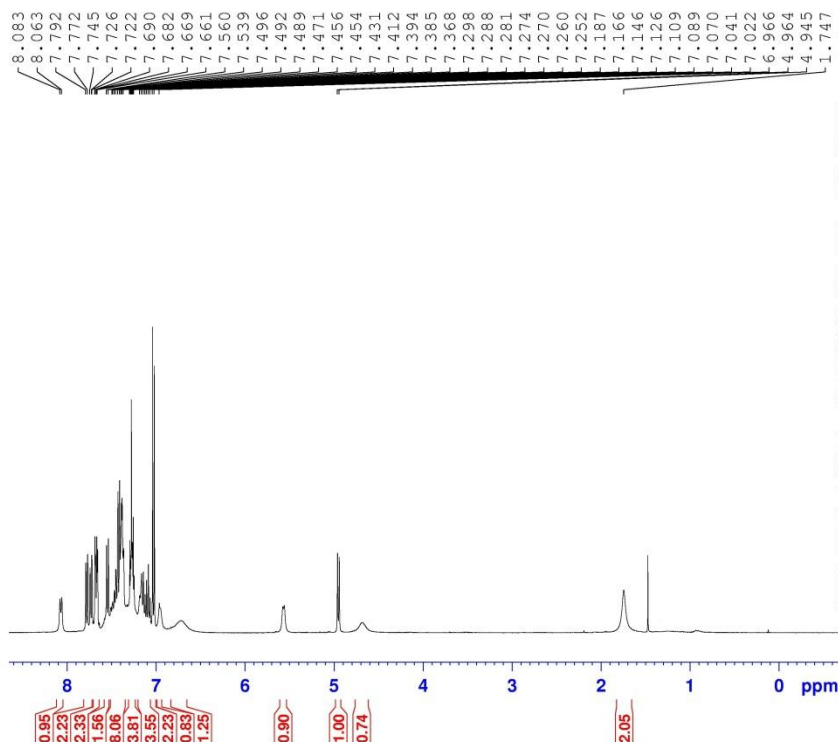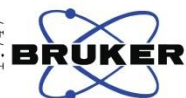

Current Data Parameters  
NAME 6KMS262  
EXPNO 1  
PROCNO 1

F2 - Acquisition Parameters  
Date\_ 20120214  
Time 18.40  
INSTRUM spect  
PROBHD 5 mm PABBO BB-  
PULPROG zg30  
TD 65536  
SOLVENT CDCl3  
NS 16  
DS 2  
SWH 8223.685 Hz  
FIDRES 0.125483 Hz  
AQ 3.9846387 sec  
RG 78.87  
DW 60.800 usec  
DE 6.50 usec  
TE 301.8 K  
D1 1.0000000 sec  
TD0 1

===== CHANNEL f1 =====  
NUC1 1H  
P1 12.38 usec  
PLW1 11.19999981 W  
SFO1 400.0924707 MHz  
F2 - Processing parameters  
SI 65536  
SF 400.0900029 MHz  
WDW EM  
SSB 0  
LB 0.30 Hz  
GB 0  
PC 1.00

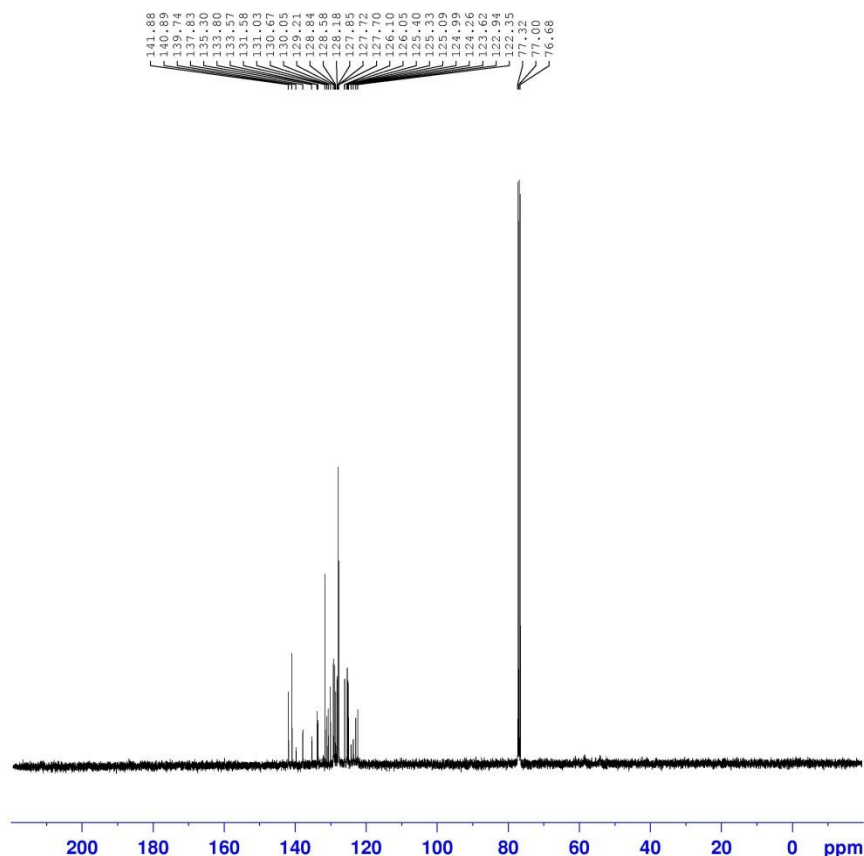

Current Data Parameters  
NAME 6KMS262  
EXPNO 2  
PROCNO 1

F2 - Acquisition Parameter  
Date\_ 20120214  
Time 18.58  
INSTRUM spect  
PROBHD 5 mm PABBO BB-  
PULPROG zgpg30  
TD 65536  
SOLVENT CDCl3  
NS 320  
DS 4  
SWH 24038.461 Hz  
FIDRES 0.366798 Hz  
AQ 1.3631988 se  
RG 200.09  
DW 20.800 us  
DE 6.50 us  
TE 303.0 K  
D1 2.00000000 se  
D11 0.03000000 se  
TD0 1

===== CHANNEL f1 =====  
NUC1 13C  
P1 7.50 us  
PLW1 61.20000076 W  
SFO1 100.6127703 MHz  
===== CHANNEL f2 =====  
CPDPRG2 waltz16  
NUC2 1H  
PCPD2 80.00 us  
PLW2 11.19999981 W  
PLW12 0.26820999 W  
PLW13 0.17166001 W  
SFO2 400.0916004 MHz

F2 - Processing parameters  
SI 32768  
SF 100.6027164 MHz  
WDW EM  
SSB 0  
LB 1.00 Hz  
GB 0  
PC 1.40

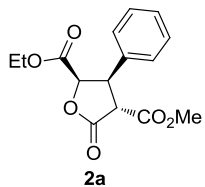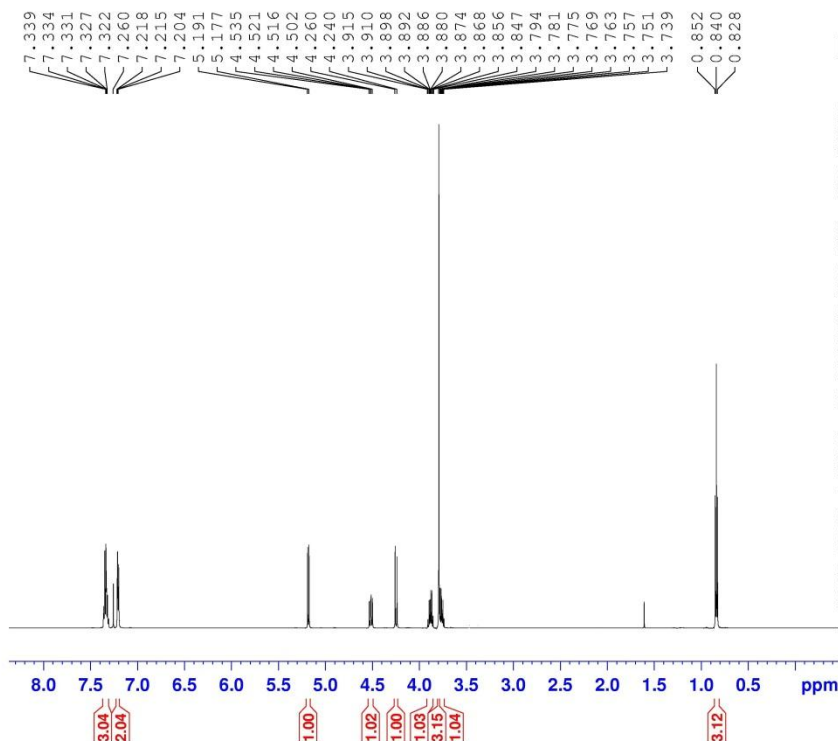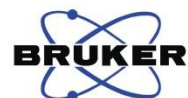

Current Data Parameters  
NAME 6KMS184  
EXPNO 2  
PROCNO 1

F2 - Acquisition Parameters  
Date\_ 20120208  
Time 13.50  
INSTRUM spect  
PROBHD 5 mm PABBO BB-  
PULPROG zg30  
TD 65536  
SOLVENT CDCl3  
NS 16  
DS 2  
SWH 12335.526 Hz  
FIDRES 0.188225 Hz  
AQ 2.6564426 sec  
RG 128  
DW 40.533 usec  
DE 6.50 usec  
TE 293.2 K  
D1 1.00000000 sec  
TD0 1

===== CHANNEL f1 =====  
NUC1 1H  
P1 13.60 usec  
PLW1 20.00000000 W  
SFO1 600.1337060 MHz

F2 - Processing parameters  
SI 65536  
SF 600.1300179 MHz  
WDW EM  
SSB 0  
LB 0.30 Hz  
GB 0  
PC 1.00

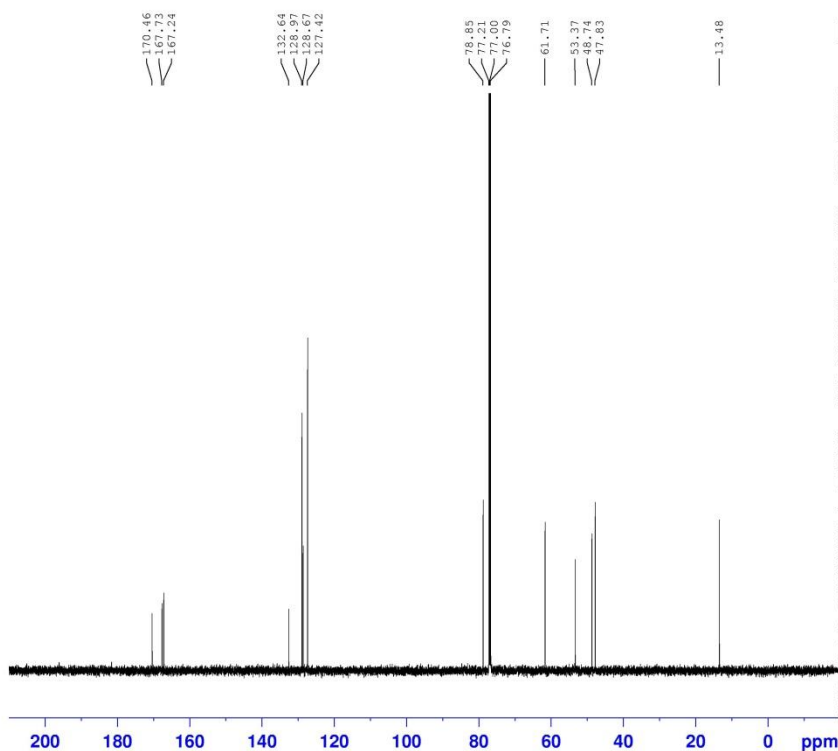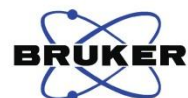

Current Data Parameters  
NAME 6KMS184  
EXPNO 3  
PROCNO 1

F2 - Acquisition Parameters  
Date\_ 20120208  
Time 13.54  
INSTRUM spect  
PROBHD 5 mm PABBO BB-  
PULPROG zgpg30  
TD 65536  
SOLVENT CDCl3  
NS 115  
DS 4  
SWH 36057.691 Hz  
FIDRES 0.550197 Hz  
AQ 0.9088159 sec  
RG 203  
DW 13.867 usec  
DE 10.00 usec  
TE 294.0 K  
D1 2.00000000 sec  
D11 0.03000000 sec  
TD0 1

===== CHANNEL f1 =====  
NUC1 13C  
P1 10.50 usec  
PLW1 110.00000000 W  
SFO1 150.9178981 MHz

===== CHANNEL f2 =====  
CPDPRG2 waltz16  
NUC2 1H  
PCPD2 70.00 usec  
PLW2 20.00000000 W  
PLW12 0.80000001 W  
PLW13 0.39199999 W  
SFO2 600.1324005 MHz

F2 - Processing parameters  
SI 32768  
SF 150.9028173 MHz  
WDW EM  
SSB 0  
LB 1.00 Hz  
GB 0  
PC 1.40

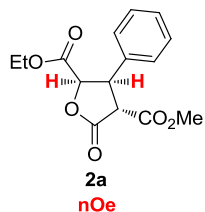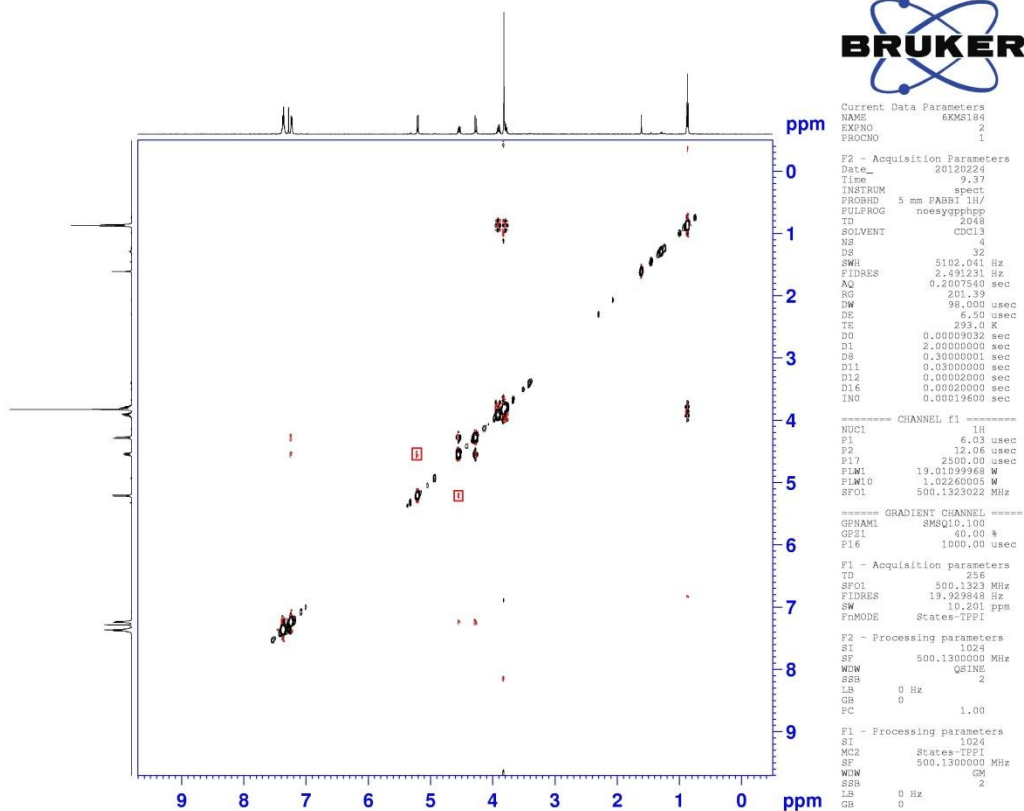

## SFC Analysis for 2a:

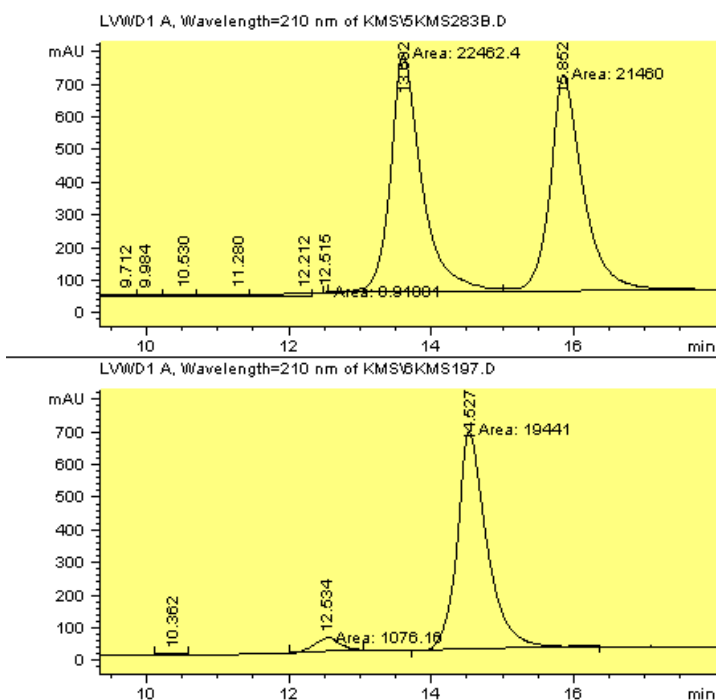

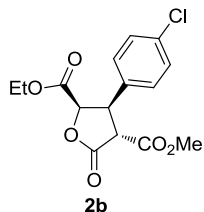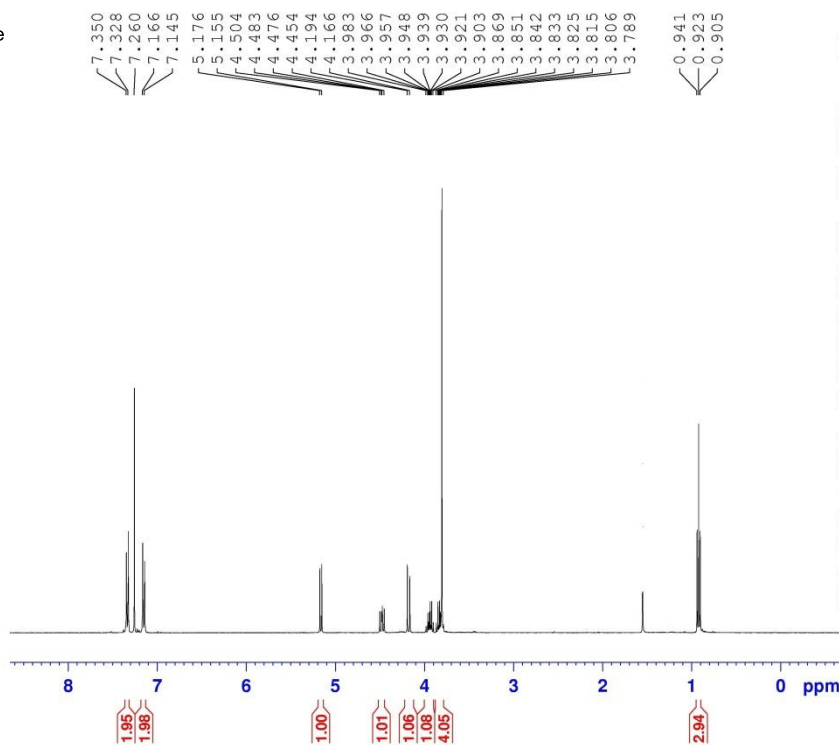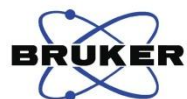

Current Data Parameters  
NAME 6KMS266  
EXPNO 1  
PROCNO 1

F2 - Acquisition Parameters  
Date\_ 20120303  
Time 12.40  
INSTRUM spect  
PROBHD 5 mm PABBO BB-  
PULPROG zg30  
TD 65536  
SOLVENT CDCl3  
NS 16  
DS 2  
SWH 8223.685 Hz  
FIDRES 0.125483 Hz  
AQ 3.9846387 sec  
RG 200.09  
DW 60.800 usec  
DE 6.50 usec  
TE 297.4 K  
D1 1.00000000 sec  
TD0 1

===== CHANNEL f1 =====  
NUC1 1H  
P1 12.38 usec  
PLW1 11.19999981 W  
SFO1 400.0924707 MHz

F2 - Processing parameters  
SI 65536  
SF 400.0900115 MHz  
WDW EM  
SSB 0  
LB 0.30 Hz  
GB 0  
PC 1.00

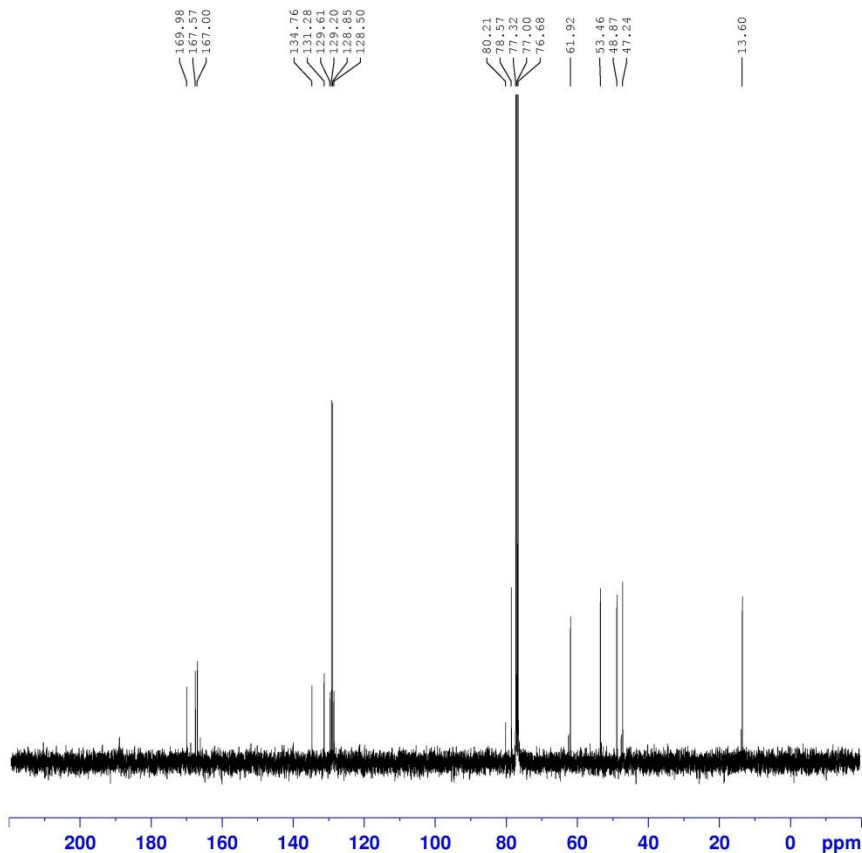

Current Data Parameters  
NAME 6KMS266  
EXPNO 2  
PROCNO 1

F2 - Acquisition Parameter  
Date\_ 20120303  
Time 14.36  
INSTRUM spect  
PROBHD 5 mm PABBO BB-  
PULPROG zgpg30  
TD 65536  
SOLVENT CDCl3  
NS 201  
DS 4  
SWH 24038.461 Hz  
FIDRES 0.366798 Hz  
AQ 1.3631988 sec  
RG 200.09  
DW 20.800 us  
DE 6.50 us  
TE 298.6 K  
D1 2.00000000 sec  
D11 0.03000000 sec  
TD0 1

===== CHANNEL f1 =====  
NUC1 13C  
P1 7.50 us  
PLW1 61.20000076 W  
SFO1 100.6127703 MHz

===== CHANNEL f2 =====  
CPDPRG2 waltz16  
NUC2 1H  
PCPD2 80.00 us  
PLW2 11.19999981 W  
PLW12 0.26820999 W  
PLW13 0.17166001 W  
SFO2 400.0916004 MHz

F2 - Processing parameters  
SI 32768  
SF 100.6027135 MHz  
WDW EM  
SSB 0  
LB 1.00 Hz  
GB 0  
PC 1.40

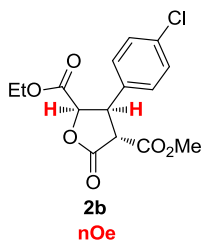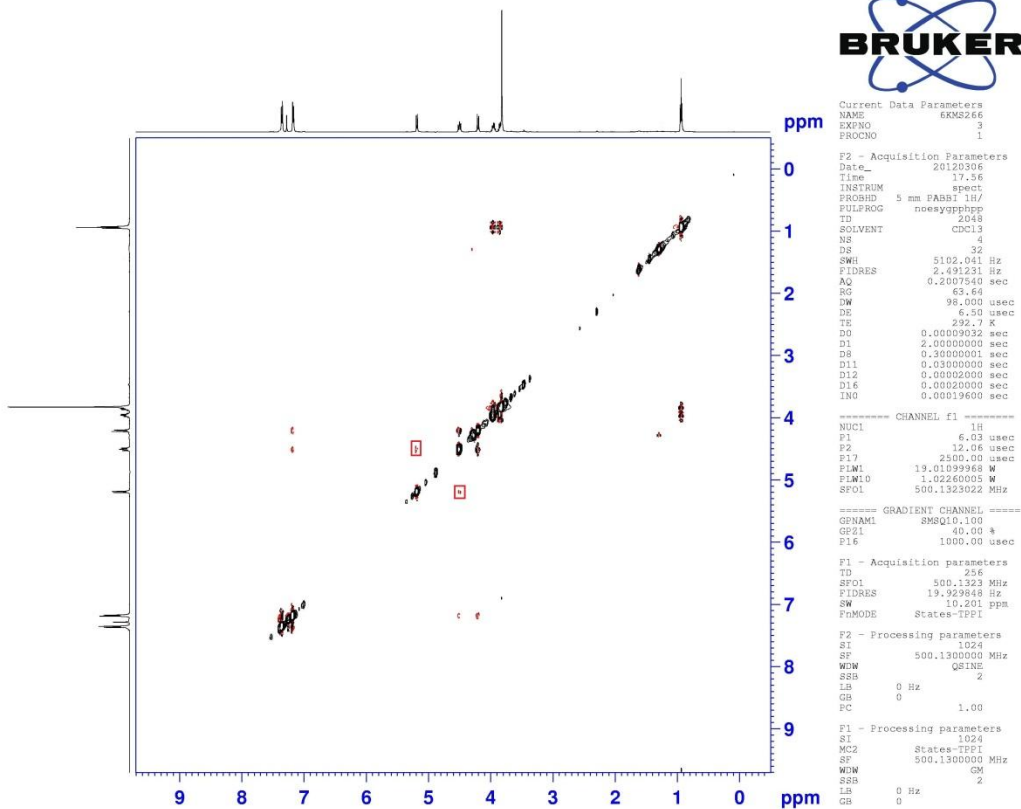

## SCF Analysis fo 2b:

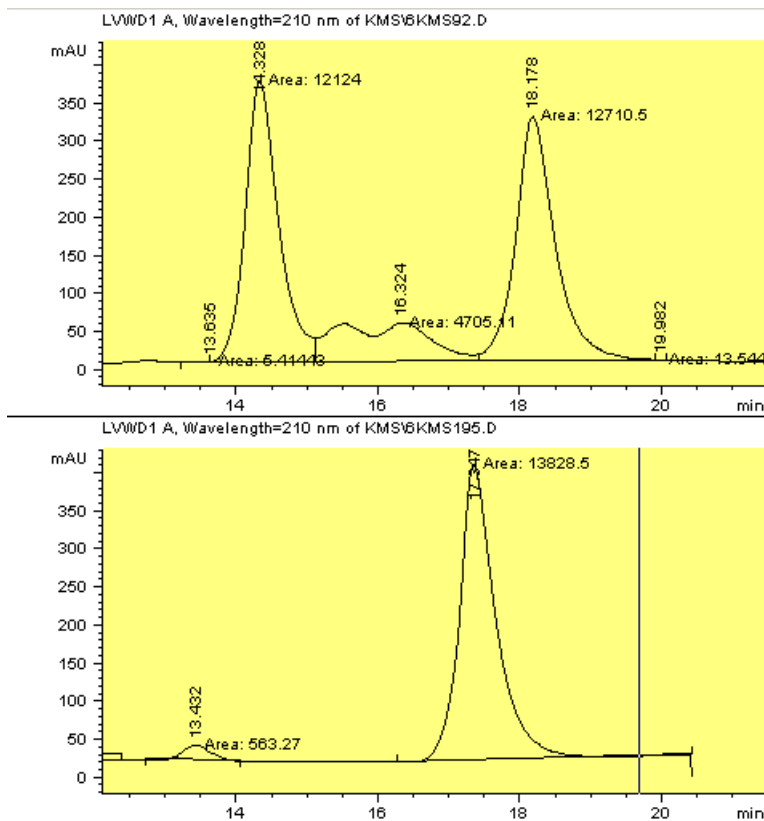

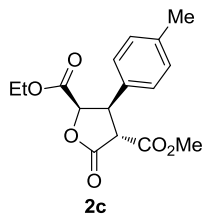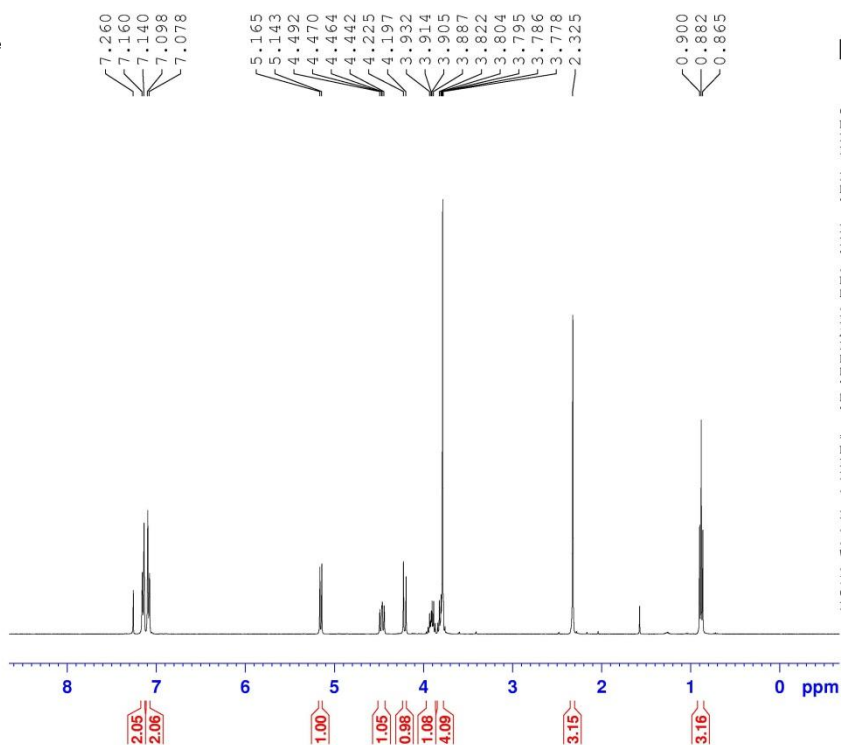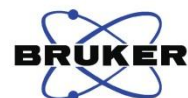

Current Data Parameters  
NAME 6KMS298  
EXPNO 1  
PROCNO 1

F2 - Acquisition Parameters  
Date\_ 20120210  
Time 11.37  
INSTRUM spect  
PROBHD 5 mm PABBO BB-  
PULPROG zg30  
TD 65536  
SOLVENT CDCl3  
NS 16  
DS 2  
SWH 8223.685 Hz  
FIDRES 0.125483 Hz  
AQ 3.9846387 sec  
RG 110.42  
DW 60.800 usec  
DE 6.50 usec  
TE 302.2 K  
D1 1.00000000 sec  
TD0 1

===== CHANNEL f1 =====  
NUC1 1H  
P1 12.38 usec  
PLW1 11.19999981 W  
SFO1 400.0924707 MHz

F2 - Processing parameters  
SI 65536  
SF 400.0900105 MHz  
WDW EM  
SSB 0  
LB 0.30 Hz  
GB 0  
PC 1.00

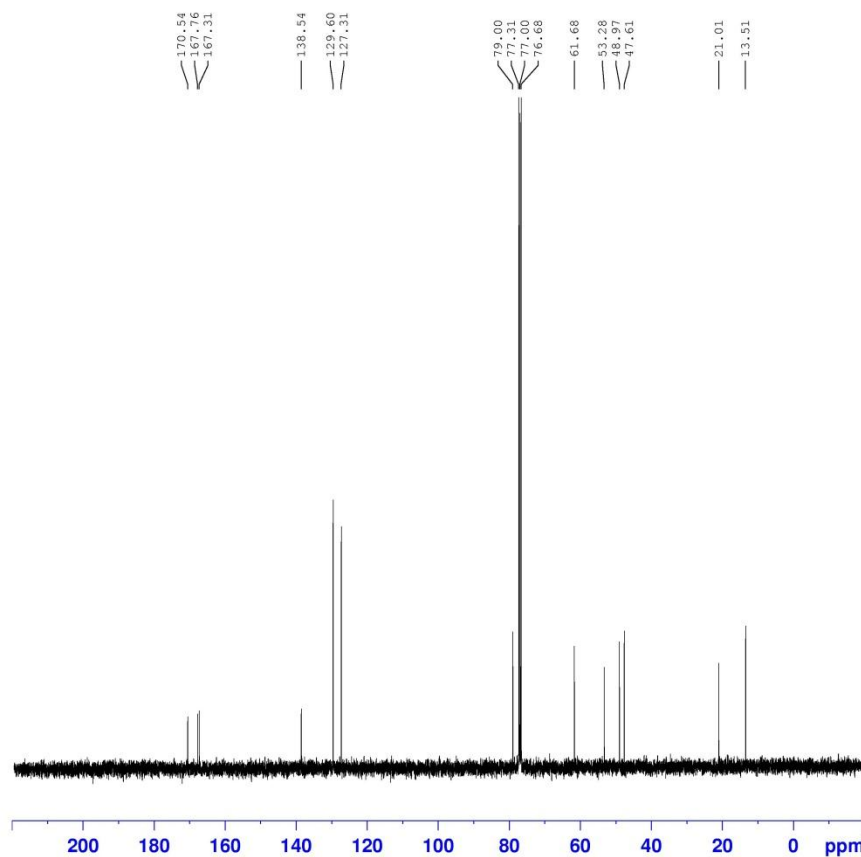

Current Data Parameters  
NAME 6KMS298  
EXPNO 2  
PROCNO 1

F2 - Acquisition Parameters  
Date\_ 20120210  
Time 11.42  
INSTRUM spect  
PROBHD 5 mm PABBO BB-  
PULPROG zgpg30  
TD 65536  
SOLVENT CDCl3  
NS 100  
DS 4  
SWH 24038.461 Hz  
FIDRES 0.366798 Hz  
AQ 1.3631988 sec  
RG 200.09  
DW 20.800 usec  
DE 6.50 usec  
TE 302.6 K  
D1 2.00000000 sec  
D11 0.03000000 sec  
TD0 1

===== CHANNEL f1 =====  
NUC1 13C  
P1 7.50 usec  
PLW1 61.20000076 W  
SFO1 100.6127703 MHz

===== CHANNEL f2 =====  
CPDPRG2 waltz16  
NUC2 1H  
PCPD2 80.00 usec  
PLW2 11.19999981 W  
PLW12 0.26820999 W  
PLW13 0.17166001 W  
SFO2 400.0916004 MHz

F2 - Processing parameters  
SI 32768  
SF 100.6027135 MHz  
WDW EM  
SSB 0  
LB 1.00 Hz  
GB 0  
PC 1.40

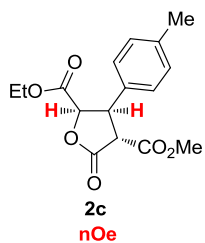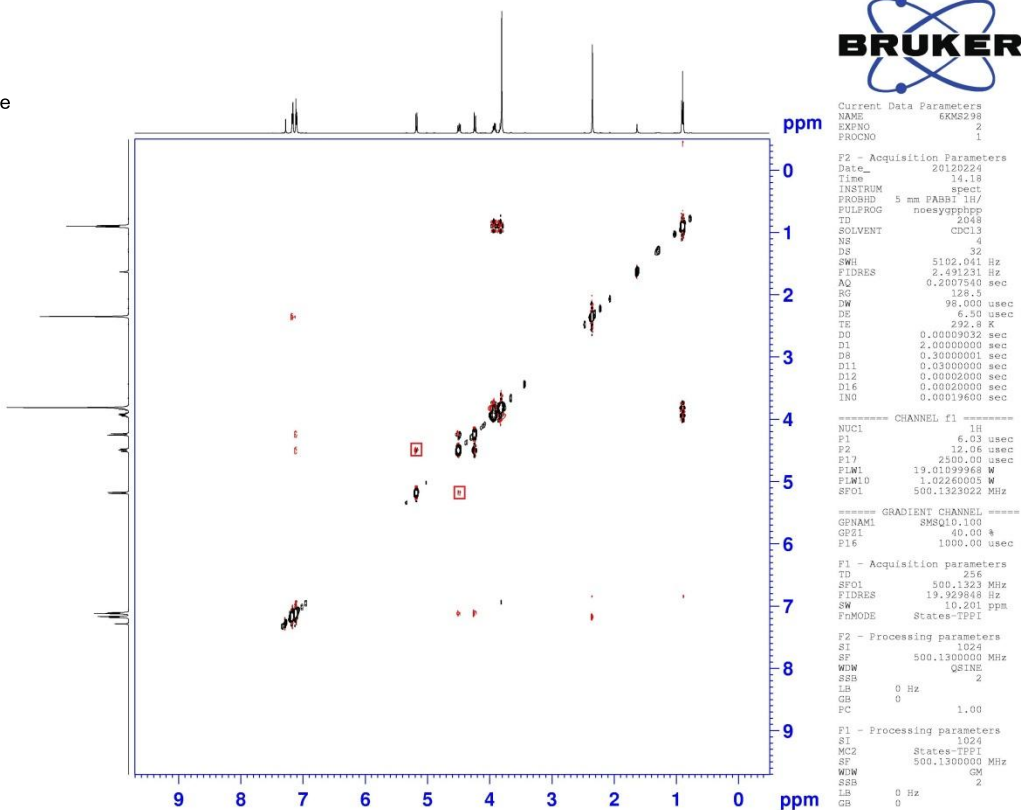

### HPLC Analysis for 2c:

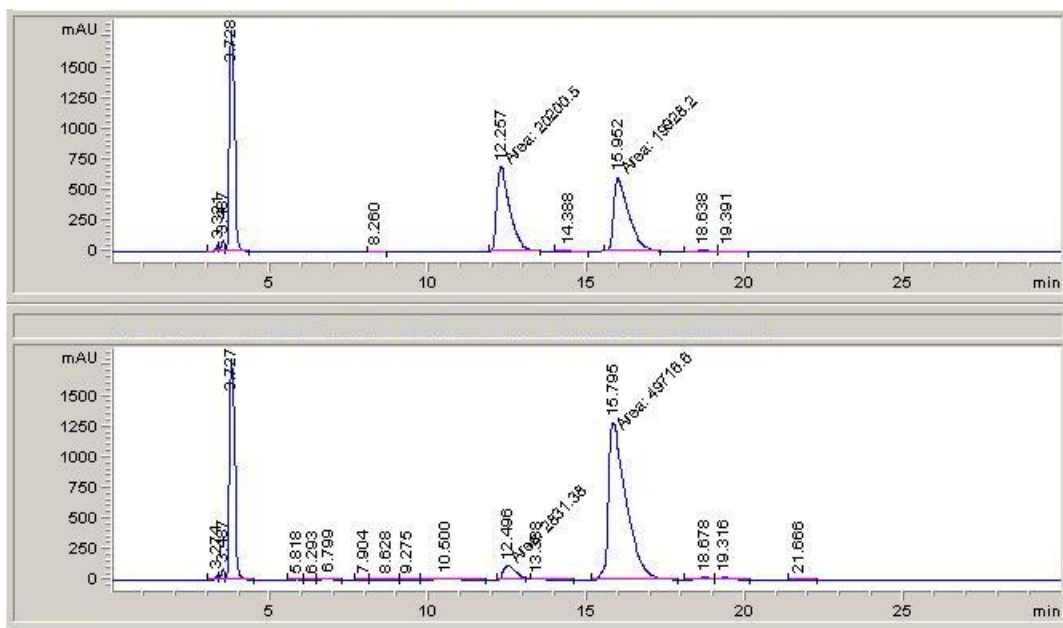

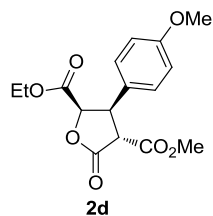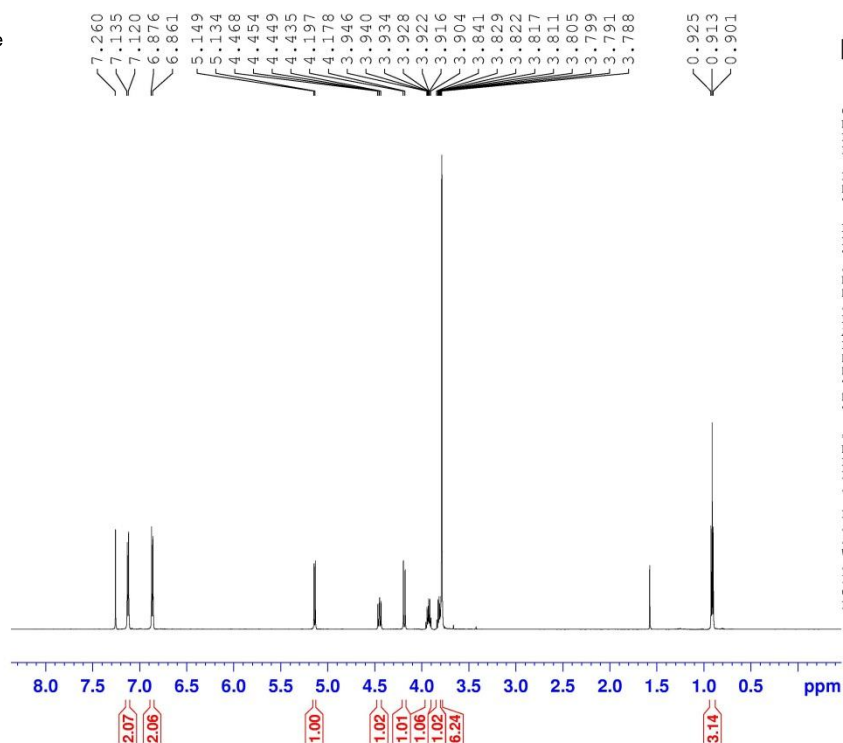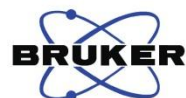

Current Data Parameters  
NAME 6KMS203  
EXPNO 1  
PROCNO 1

F2 - Acquisition Parameters  
Date\_ 20120210  
Time 14.08  
INSTRUM spect  
PROBHD 5 mm PABBO BB-  
PULPROG zg30  
TD 65536  
SOLVENT CDCl3  
NS 16  
DS 2  
SWH 12335.526 Hz  
FIDRES 0.188225 Hz  
AQ 2.6564426 sec  
RG 203  
DW 40.533 usec  
DE 6.50 usec  
TE 293.1 K  
D1 1.00000000 sec  
TD0 1

===== CHANNEL f1 =====  
NUC1 1H  
P1 13.60 usec  
PLW1 20.00000000 W  
SF01 600.1337060 MHz

F2 - Processing parameters  
SI 65536  
SF 600.1300179 MHz  
WDW EM  
SSB 0  
LB 0.30 Hz  
GB 0  
PC 1.00

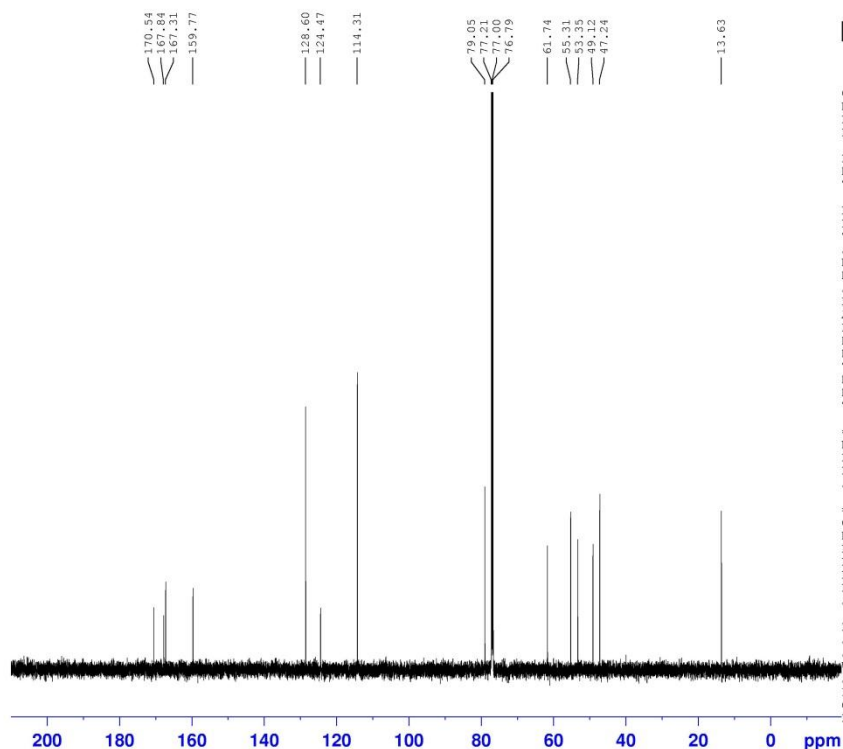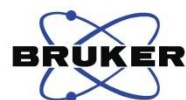

Current Data Parameters  
NAME 6KMS203  
EXPNO 2  
PROCNO 1

F2 - Acquisition Parameters  
Date\_ 20120210  
Time 14.18  
INSTRUM spect  
PROBHD 5 mm PABBO BB-  
PULPROG zgpg30  
TD 65536  
SOLVENT CDCl3  
NS 270  
DS 4  
SWH 36057.691 Hz  
FIDRES 0.550197 Hz  
AQ 0.9088159 sec  
RG 203  
DW 13.867 usec  
DE 10.00 usec  
TE 294.7 K  
D1 2.00000000 sec  
D11 0.03000000 sec  
TD0 1

===== CHANNEL f1 =====  
NUC1 13C  
P1 10.50 usec  
PLW1 110.00000000 W  
SF01 150.9178981 MHz

===== CHANNEL f2 =====  
CPDPRG2 waltz16  
NUC2 1H  
PCPD2 70.00 usec  
PLW2 20.00000000 W  
PLW12 0.800000001 W  
PLW13 0.39199999 W  
SF02 600.1324005 MHz

F2 - Processing parameters  
SI 32768  
SF 150.9028151 MHz  
WDW EM  
SSB 0  
LB 1.00 Hz  
GB 0  
PC 1.40

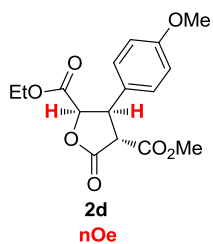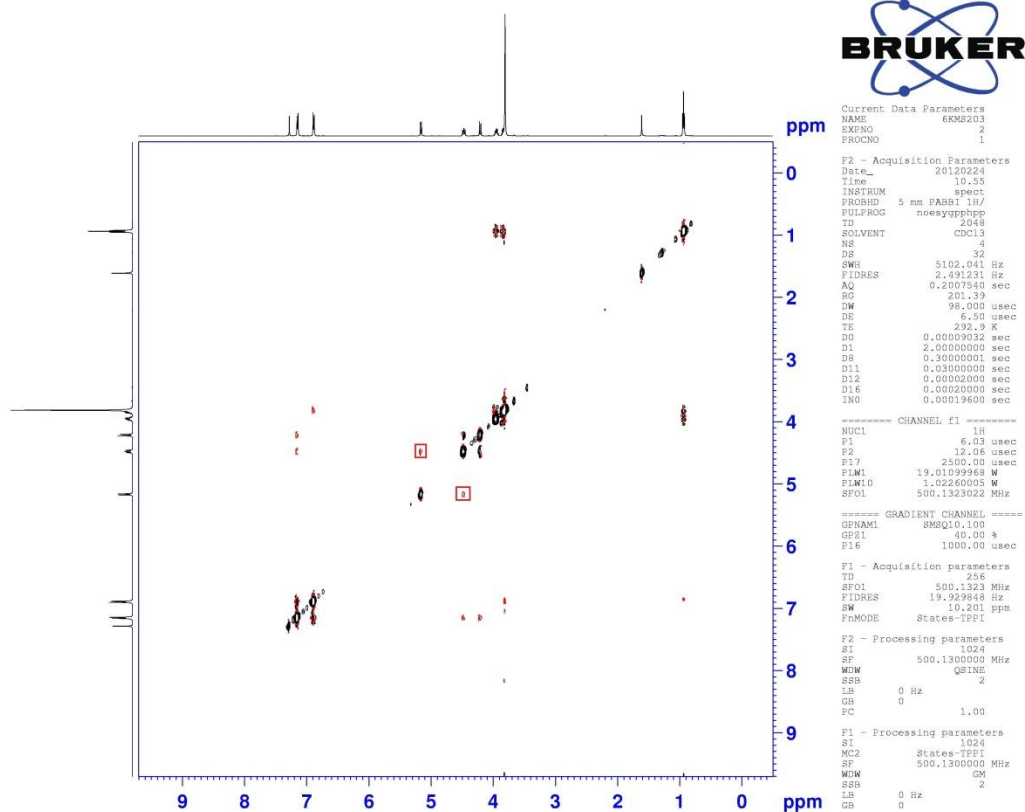

## HPLC Analysis for 2d:

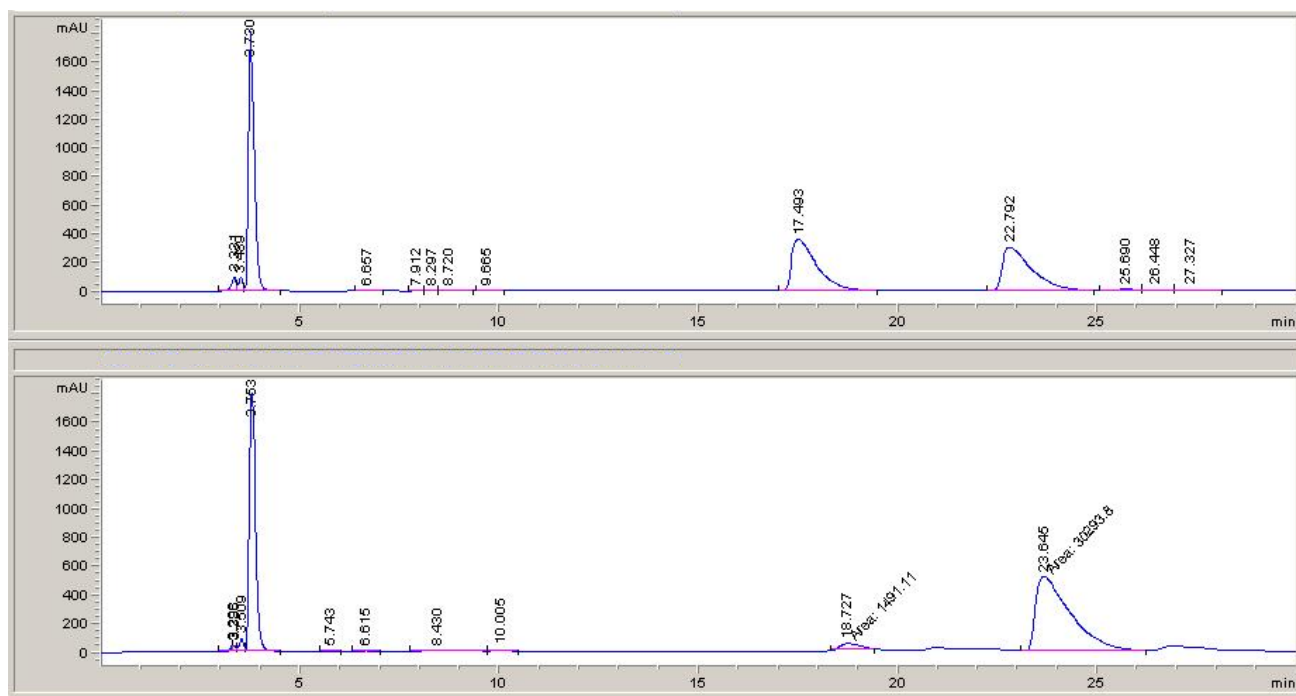

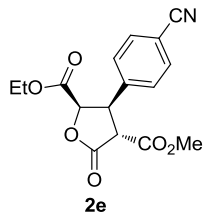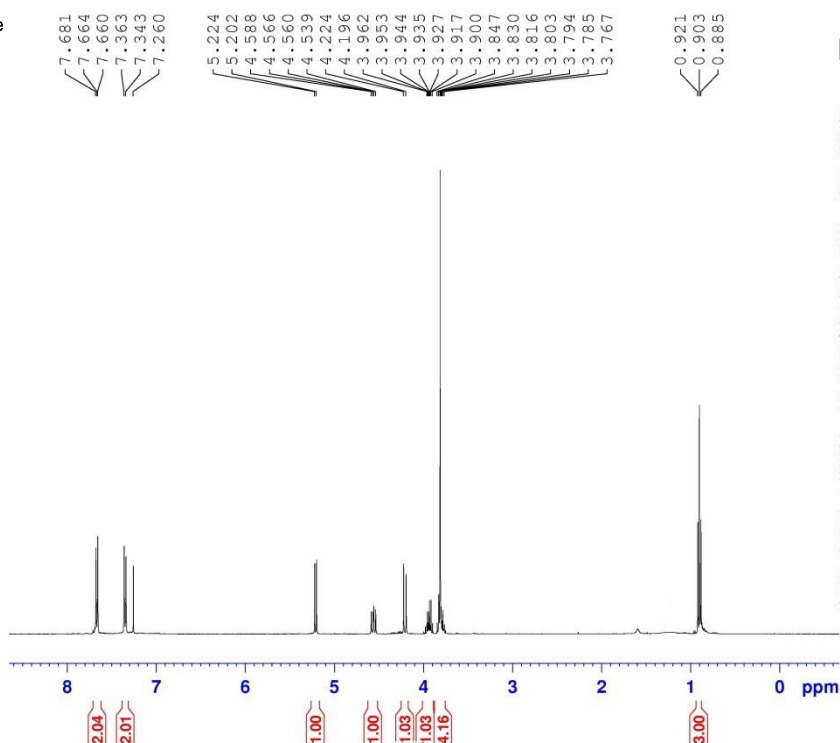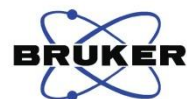

Current Data Parameters  
NAME 6KMS233  
EXPNO 1  
PROCNO 1

F2 - Acquisition Parameters  
Date\_ 20120302  
Time 19.16  
INSTRUM spect  
PROBHD 5 mm PABBO BB-  
PULPROG zg30  
TD 65536  
SOLVENT CDCl3  
NS 16  
DS 2  
SWH 8223.685 Hz  
FIDRES 0.125483 Hz  
AQ 3.9846387 sec  
RG 110.42  
DW 60.800 usec  
DE 6.50 usec  
TE 297.2 K  
D1 1.00000000 sec  
TD0 1

===== CHANNEL f1 =====  
NUC1 1H  
P1 12.38 usec  
PLW1 11.19999981 W  
SFO1 400.0924707 MHz

F2 - Processing parameters  
SI 65536  
SF 400.0900114 MHz  
WDW EM  
SSB 0  
LB 0.30 Hz  
GB 0  
PC 1.00

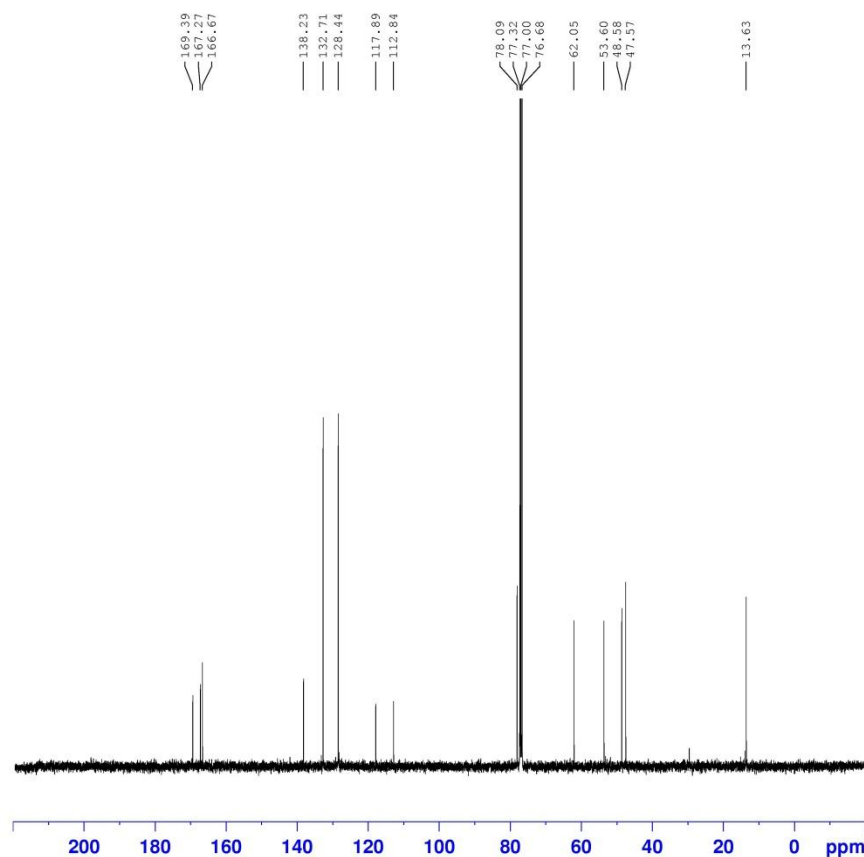

Current Data Parameters  
NAME 6KMS233  
EXPNO 2  
PROCNO 1

F2 - Acquisition Parameter  
Date\_ 20120302  
Time 19.53  
INSTRUM spect  
PROBHD 5 mm PABBO BB-  
PULPROG zgpg30  
TD 65536  
SOLVENT CDCl3  
NS 608  
DS 4  
SWH 24038.461 Hz  
FIDRES 0.366798 Hz  
AQ 1.3631988 se  
RG 200.09  
DW 20.800 us  
DE 6.50 us  
TE 298.5 K  
D1 2.00000000 se  
D11 0.03000000 se  
TD0 1

===== CHANNEL f1 =====  
NUC1 13C  
P1 7.50 us  
PLW1 61.20000076 W  
SFO1 100.6127703 MHz

===== CHANNEL f2 =====  
CPDPRG2 waltz16  
NUC2 1H  
PCPD2 80.00 us  
PLW2 11.19999981 W  
PLW12 0.26820999 W  
PLW13 0.17166001 W  
SFO2 400.0916004 MHz

F2 - Processing parameters  
SI 32768  
SF 100.6027149 MHz  
WDW EM  
SSB 0  
LB 1.00 Hz  
GB 0  
PC 1.40

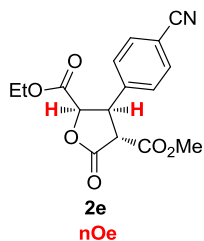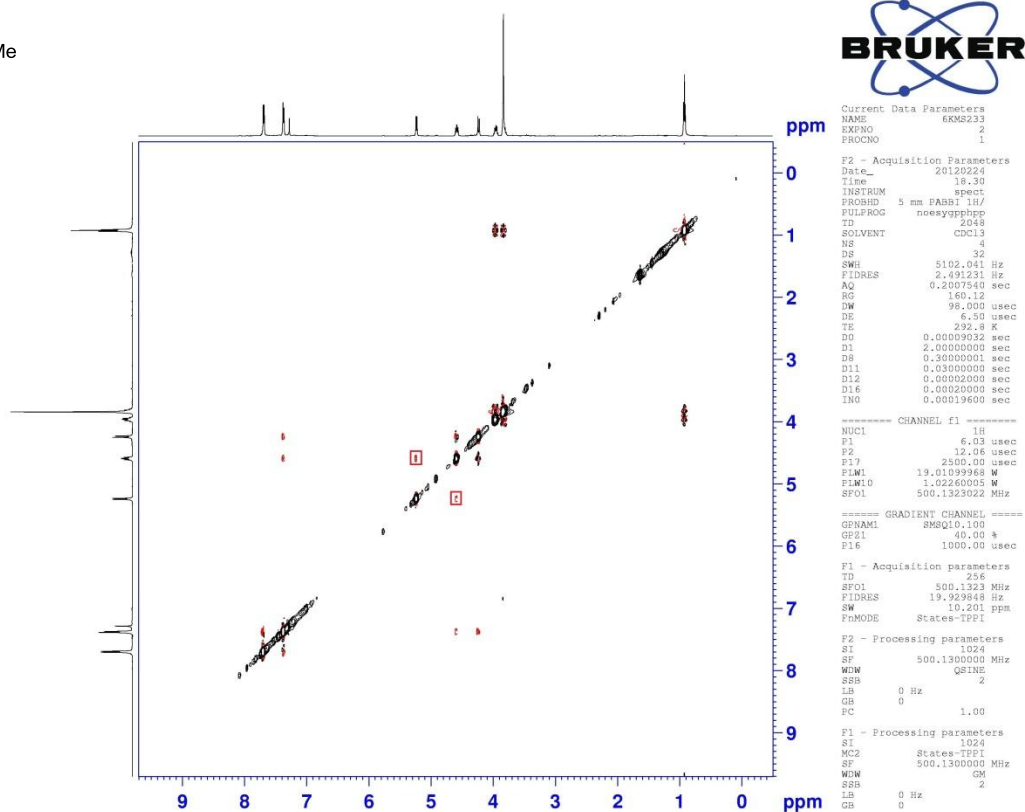

## HPLC Analysis for 2e:

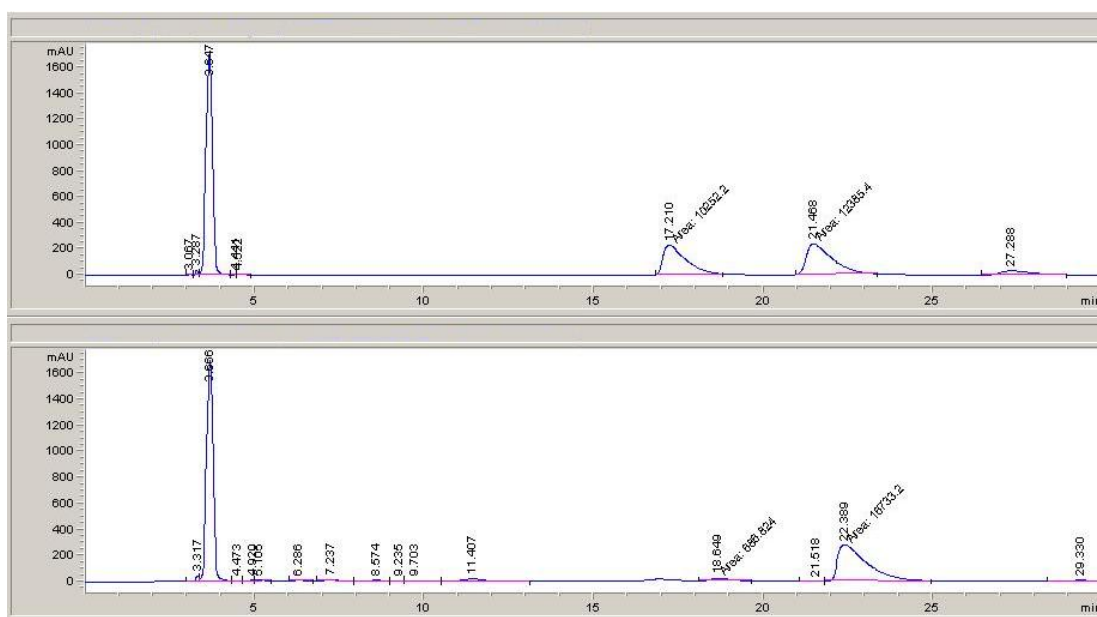

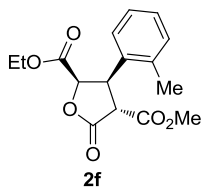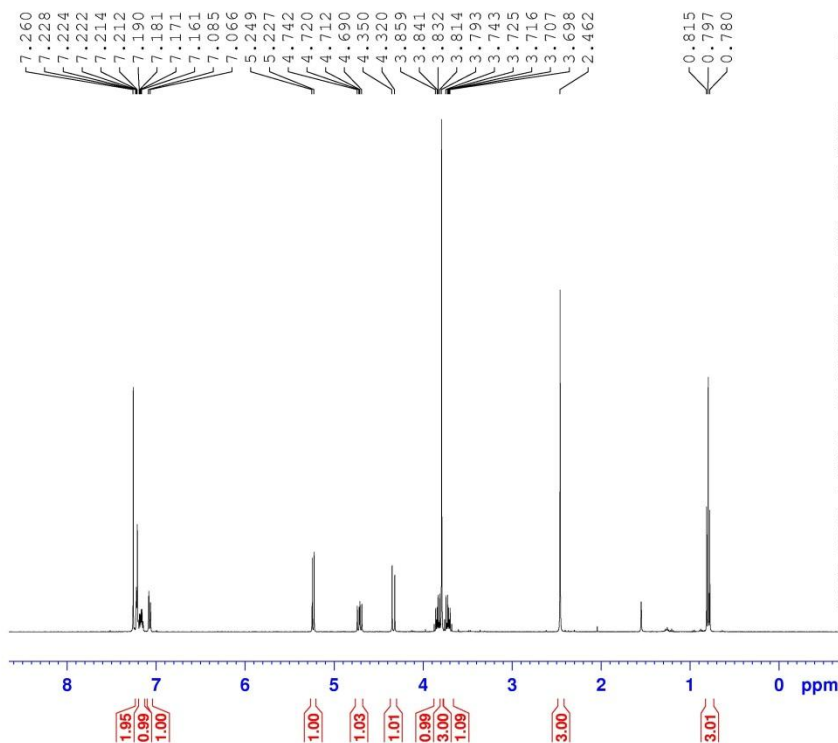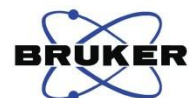

Current Data Parameters  
NAME 7KMS61  
EXPNO 1  
PROCNO 1

F2 - Acquisition Parameters  
Date\_ 20120303  
Time 14.45  
INSTRUM spect  
PROBHD 5 mm PABBO BB-  
PULPROG zg30  
TD 65536  
SOLVENT CDC13  
NS 14  
DS 2  
SWH 8223.685 Hz  
FIDRES 0.125483 Hz  
AQ 3.9846387 sec  
RG 200.09  
DW 60.800 usec  
DE 6.50 usec  
TE 297.9 K  
D1 1.00000000 sec  
TD0 1

===== CHANNEL f1 =====  
NUC1 1H  
P1 12.38 usec  
PLW1 11.19999981 W  
SFO1 400.0924707 MHz  
  
F2 - Processing parameters  
SI 65536  
SF 400.0900115 MHz  
WDW EM  
SSB 0  
LB 0.30 Hz  
GB 0  
PC 1.00

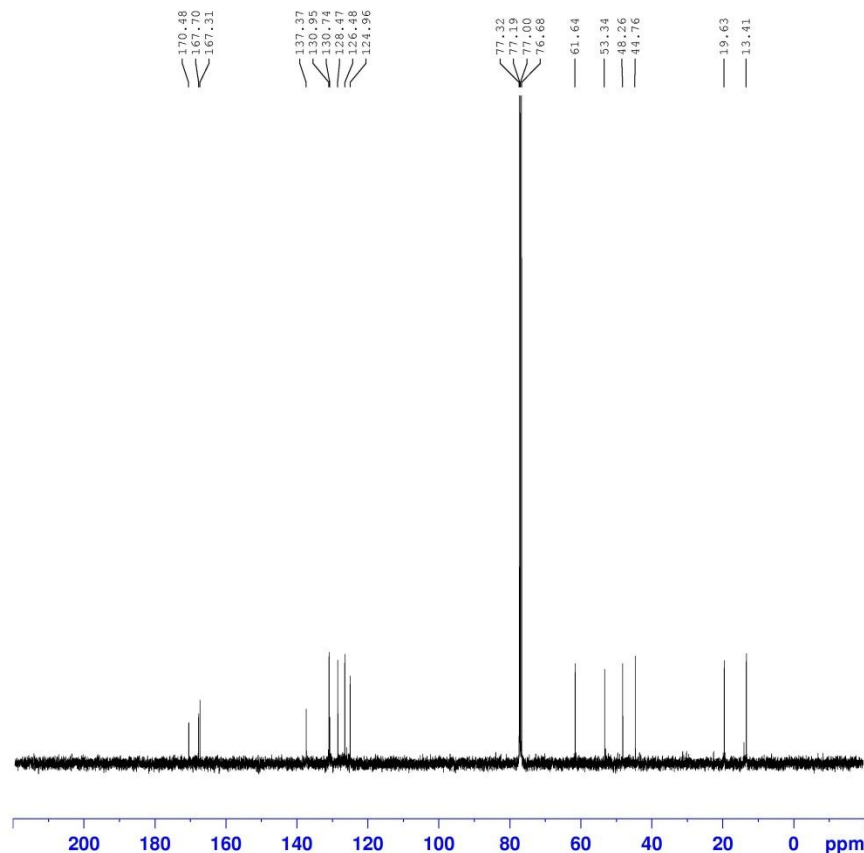

Current Data Parameters  
NAME 7KMS61  
EXPNO 2  
PROCNO 1

F2 - Acquisition Parameter  
Date\_ 20120303  
Time 12.58  
INSTRUM spect  
PROBHD 5 mm PABBO BB-  
PULPROG zgpg30  
TD 65536  
SOLVENT CDC13  
NS 254  
DS 4  
SWH 24038.461 Hz  
FIDRES 0.366798 Hz  
AQ 1.3631988 se  
RG 200.09  
DW 20.800 us  
DE 6.50 us  
TE 298.6 K  
D1 2.00000000 se  
D11 0.03000000 se  
TD0 1

===== CHANNEL f1 =====  
NUC1 13C  
P1 7.50 us  
PLW1 61.20000076 W  
SFO1 100.6127703 MHz

===== CHANNEL f2 =====  
CPDPRG2 waltz16  
NUC2 1H  
PCPD2 80.00 us  
PLW2 11.19999981 W  
PLW12 0.26820999 W  
PLW13 0.17166001 W  
SFO2 400.0916004 MHz

F2 - Processing parameters  
SI 32768  
SF 100.6027149 MHz  
WDW EM  
SSB 0  
LB 1.00 Hz  
GB 0  
PC 1.40

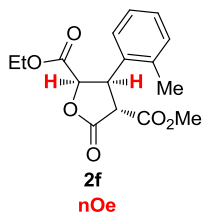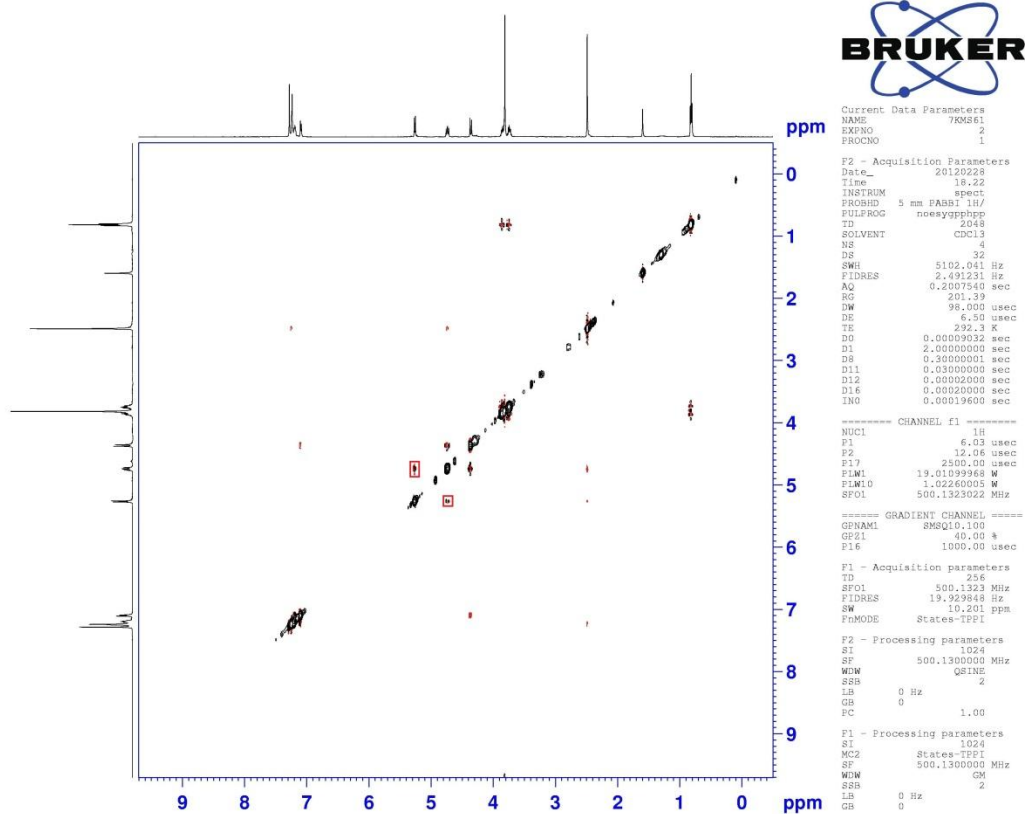

### HPLC Analysis for 2f:

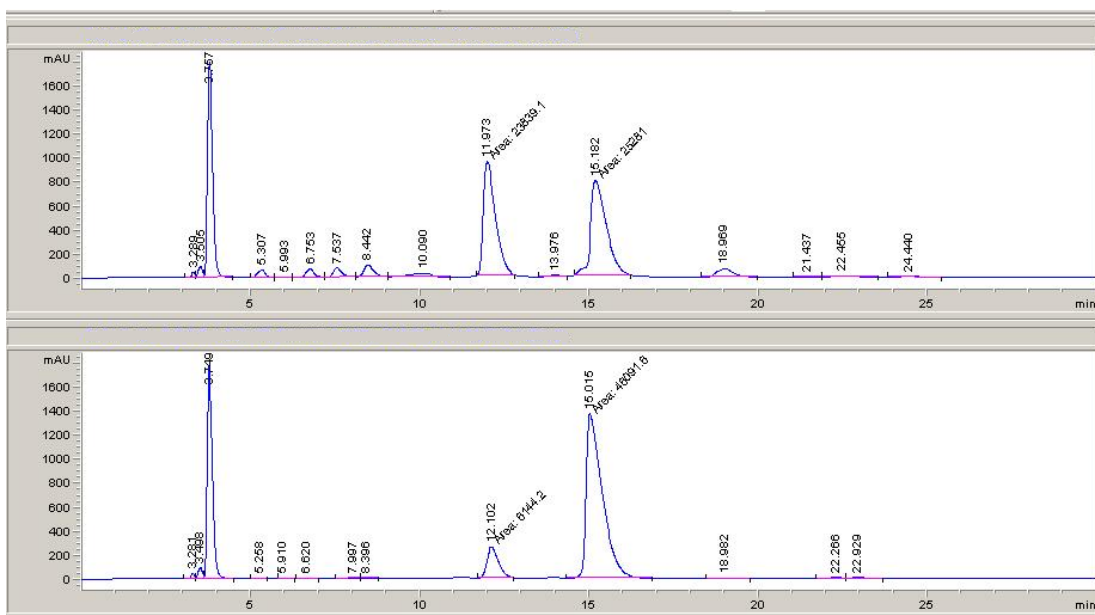

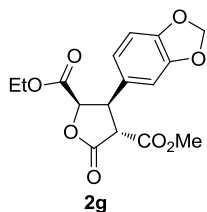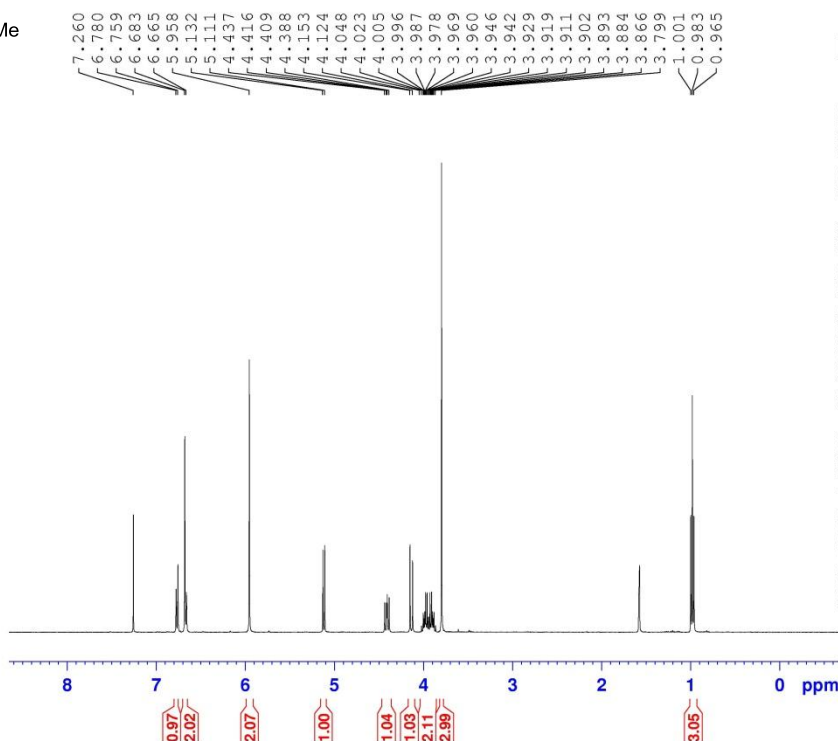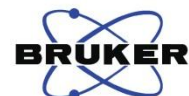

Current Data Parameters  
 NAME 7KM25  
 EXPNO 2  
 PROCNO 1

F2 - Acquisition Parameters  
 Date\_ 20120302  
 Time 9.25  
 INSTRUM spect  
 PROBHD 5 mm PABBO BB-  
 PULPROG zg30  
 TD 65536  
 SOLVENT CDCl3  
 NS 16  
 DS 2  
 SWH 8223.685 Hz  
 FIDRES 0.125483 Hz  
 AQ 3.9846387 sec  
 RG 156.94  
 DW 60.800 usec  
 DE 6.50 usec  
 TE 297.2 K  
 D1 1.00000000 sec  
 TD0 1

===== CHANNEL f1 =====  
 NUC1 1H  
 P1 12.38 usec  
 PLW1 11.1999981 W  
 SFO1 400.0924707 MHz

F2 - Processing parameters  
 SI 65536  
 SF 400.0900114 MHz  
 WDW EM  
 SSB 0  
 LB 0.30 Hz  
 GB 0  
 PC 1.00

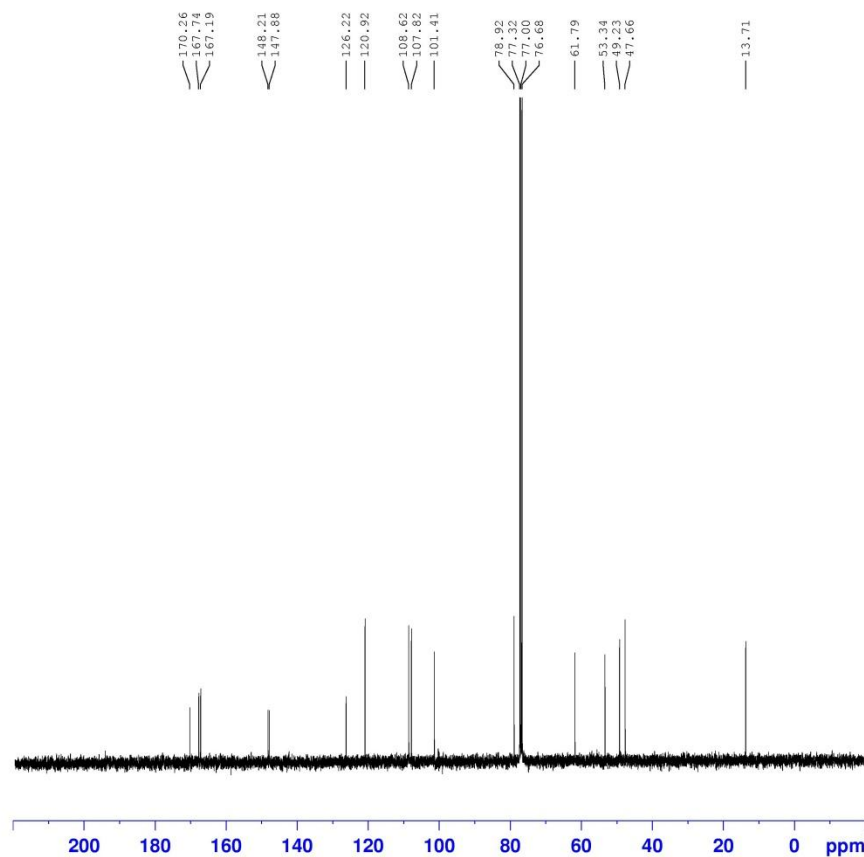

Current Data Parameters  
 NAME 7KM25  
 EXPNO 2  
 PROCNO 1

F2 - Acquisition Parameter  
 Date\_ 20120215  
 Time 15.30  
 INSTRUM spect  
 PROBHD 5 mm PABBO BB-  
 PULPROG zgpg30  
 TD 65536  
 SOLVENT CDCl3  
 NS 201  
 DS 4  
 SWH 24038.461 Hz  
 FIDRES 0.366798 Hz  
 AQ 1.3631988 se  
 RG 200.09  
 DW 20.800 us  
 DE 6.50 us  
 TE 302.4 K  
 D1 2.00000000 se  
 D11 0.03000000 se  
 TD0 1

===== CHANNEL f1 =====  
 NUC1 13C  
 P1 7.50 usec  
 PLW1 61.20000076 W  
 SFO1 100.6127703 MHz

===== CHANNEL f2 =====  
 CPDPRG2 waltz16  
 NUC2 1H  
 PCPD2 80.00 usec  
 PLW2 11.1999981 W  
 PLW12 0.26820999 W  
 PLW13 0.17160001 W  
 SFO2 400.0916004 MHz

F2 - Processing parameters  
 SI 32768  
 SF 100.6027131 MHz  
 WDW EM  
 SSB 0  
 LB 1.00 Hz  
 GB 0  
 PC 1.40

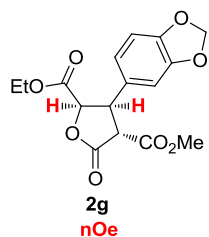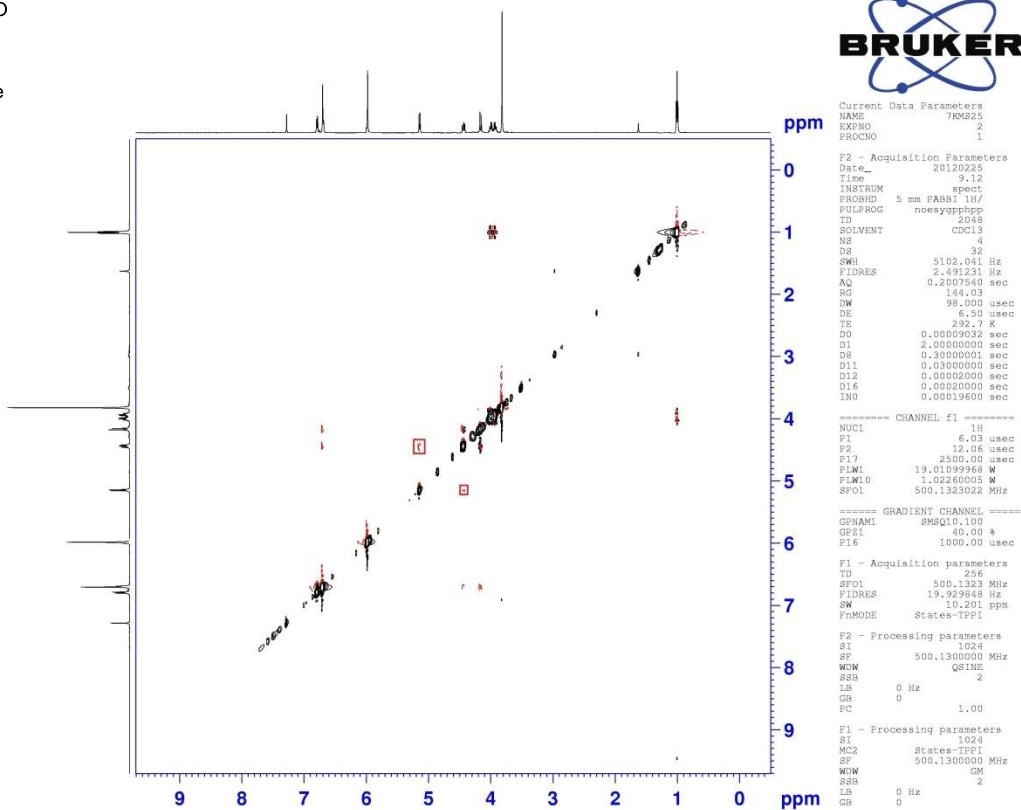

### HPLC Analysis for 2g (top: small scale; bottom: large scale)

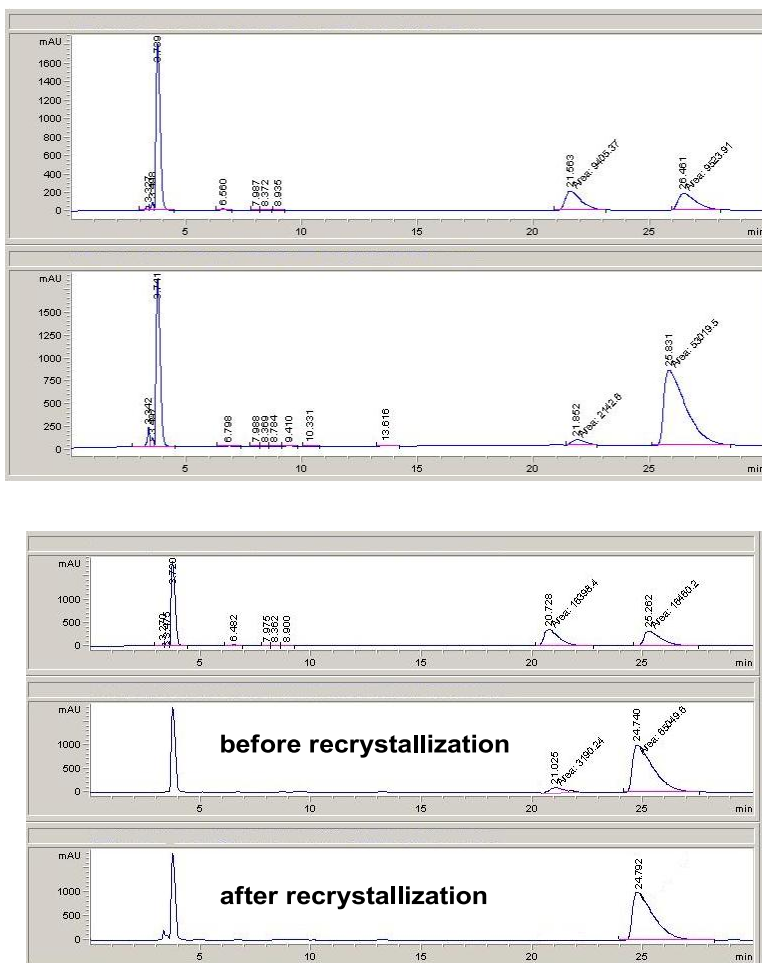

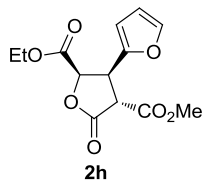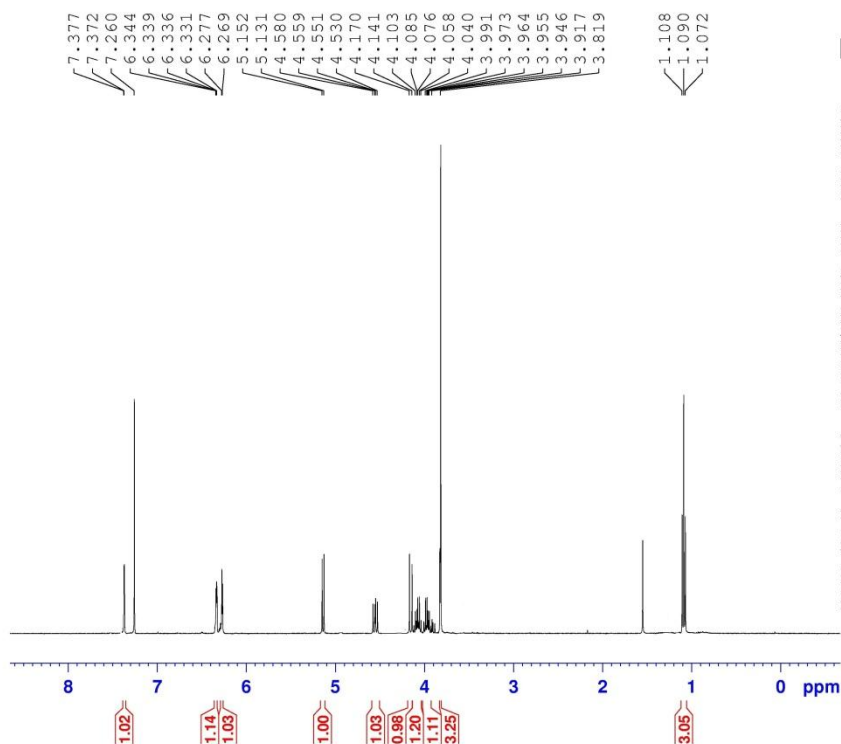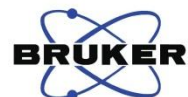

Current Data Parameters  
NAME 7KMS59  
EXPNO 1  
PROCNO 1

F2 - Acquisition Parameters  
Date\_ 20120305  
Time 17.48  
INSTRUM spect  
PROBHD 5 mm PABBO BB-  
PULPROG zg30  
TD 65536  
SOLVENT CDCl<sub>3</sub>  
NS 16  
DS 2  
SWH 8223.685 Hz  
FIDRES 0.125483 Hz  
AQ 3.9846387 sec  
RG 200.09  
DW 60.800 usec  
DE 6.50 usec  
TE 297.6 K  
D1 1.00000000 sec  
TD0 1

===== CHANNEL f1 =====  
NUC1 1H  
P1 12.38 usec  
PLW1 11.1999981 W  
SFO1 400.0924707 MHz

F2 - Processing parameters  
SI 65536  
SF 400.0900113 MHz  
WDW EM  
SSB 0  
LB 0.30 Hz  
GB 0  
PC 1.00

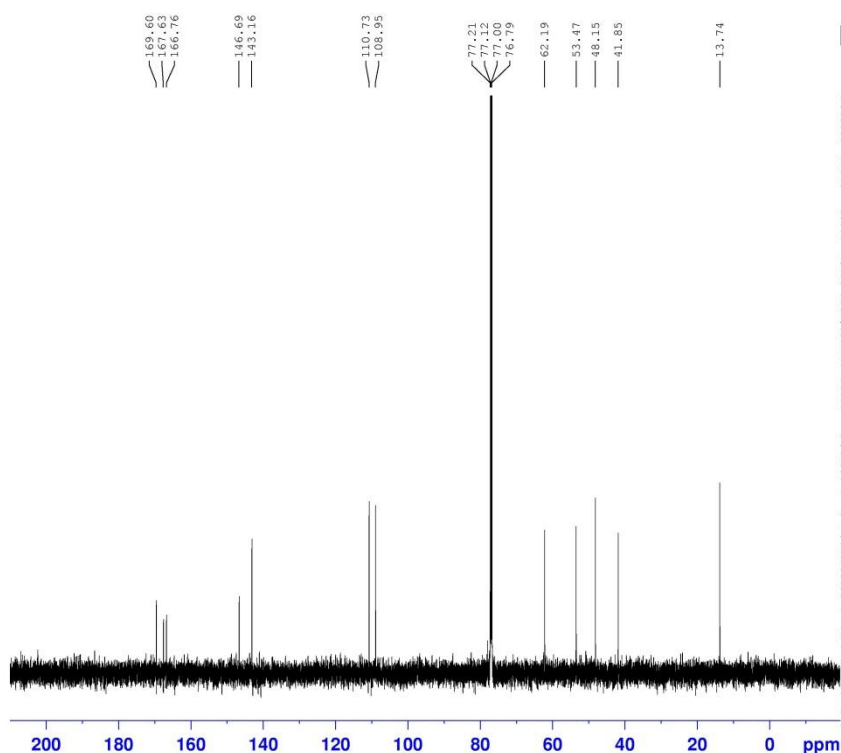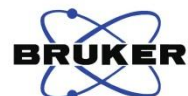

Current Data Parameters  
NAME 7KMS59  
EXPNO 2  
PROCNO 1

F2 - Acquisition Parameters  
Date\_ 20120309  
Time 11.06  
INSTRUM spect  
PROBHD 5 mm PABBO BB-  
PULPROG zgpg30  
TD 65536  
SOLVENT CDCl<sub>3</sub>  
NS 340  
DS 4  
SWH 36057.691 Hz  
FIDRES 0.550197 Hz  
AQ 0.9088159 sec  
RG 203  
DW 13.867 usec  
DE 10.00 usec  
TE 295.2 K  
D1 2.00000000 sec  
D11 0.03000000 sec  
TD0 1

===== CHANNEL f1 =====  
NUC1 13C  
P1 10.50 usec  
PLW1 110.0000000 W  
SFO1 150.9178981 MHz

===== CHANNEL f2 =====  
CPDPRG2 waltz16  
NUC2 1H  
PCPD2 70.00 usec  
PLW2 20.0000000 W  
PLW12 0.8000000 W  
PLW13 0.3919999 W  
SFO2 600.1324005 MHz

F2 - Processing parameters  
SI 32768  
SF 150.9028140 MHz  
WDW EM  
SSB 0  
LB 1.00 Hz  
GB 0  
PC 1.40

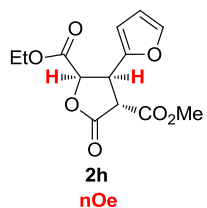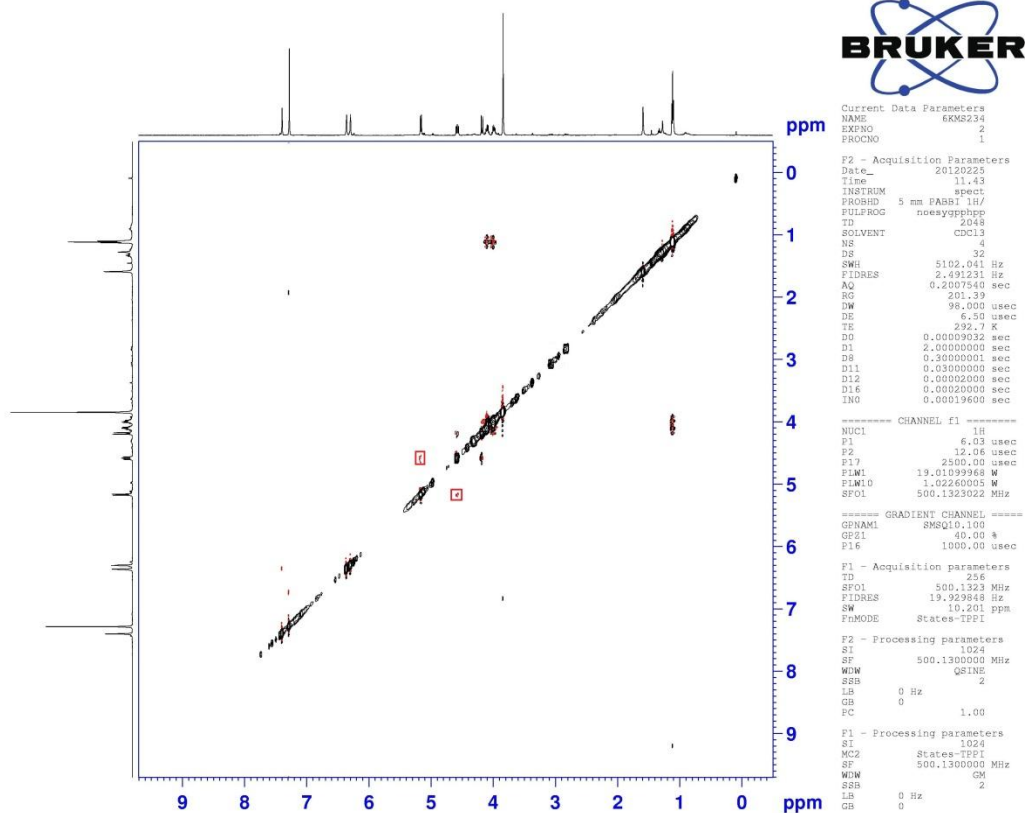

## HPLC Analysis of 2h:

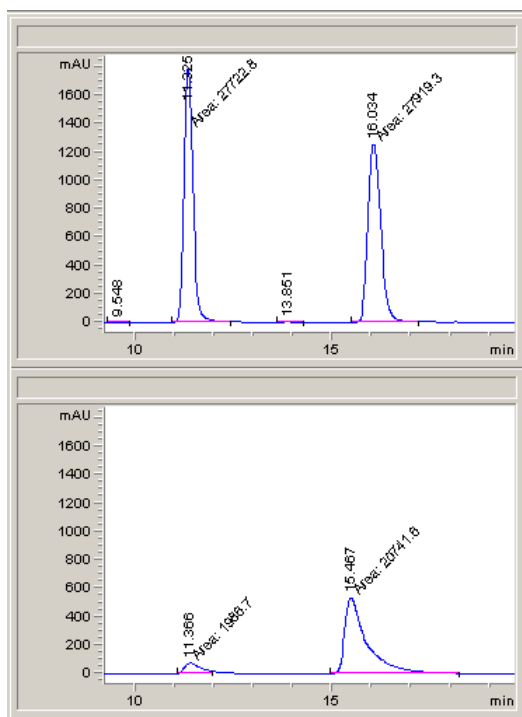

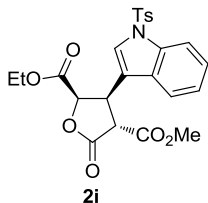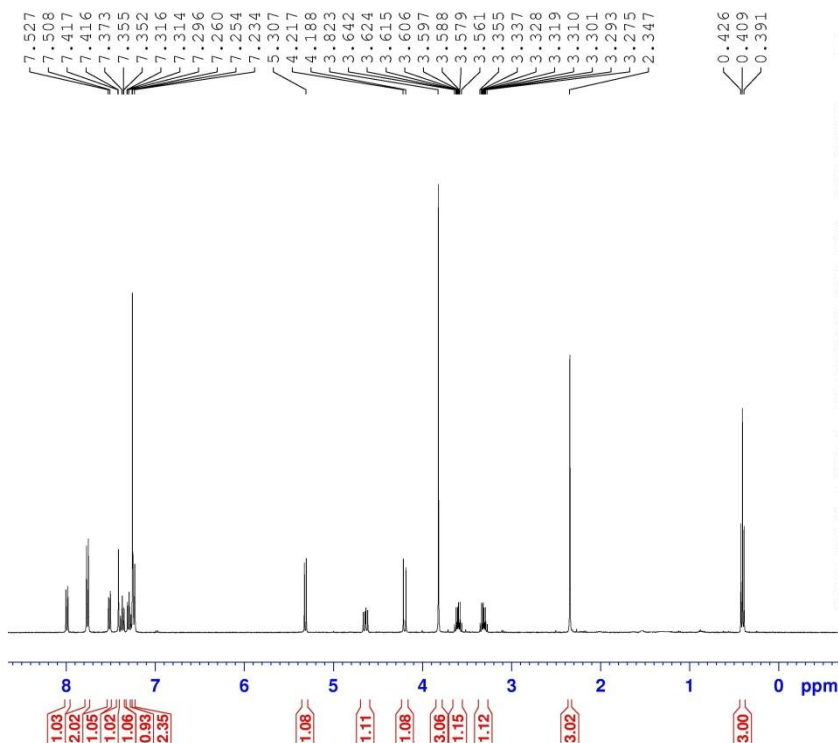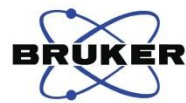

Current Data Parameters  
NAME 7KM26  
EXPNO 1  
PROCNO 1

F2 - Acquisition Parameters  
Date\_ 20120215  
Time 15.19  
INSTRUM spect  
PROBHD 5 mm PABBO BB-  
PULPROG zg30  
TD 65536  
SOLVENT CDCl3  
NS 16  
DS 2  
SWH 8223.685 Hz  
FIDRES 0.125483 Hz  
AQ 3.9846387 sec  
RG 200.09  
DW 60.800 usec  
DE 6.50 usec  
TE 301.6 K  
D1 1.00000000 sec  
TD0 1

===== CHANNEL f1 =====  
NUC1 1H  
P1 12.38 usec  
PLW1 11.19999981 W  
SFO1 400.0924707 MHz

F2 - Processing parameters  
SI 65536  
SF 400.0900113 MHz  
WDW EM  
SSB 0  
LB 0.30 Hz  
GB 0  
PC 1.00

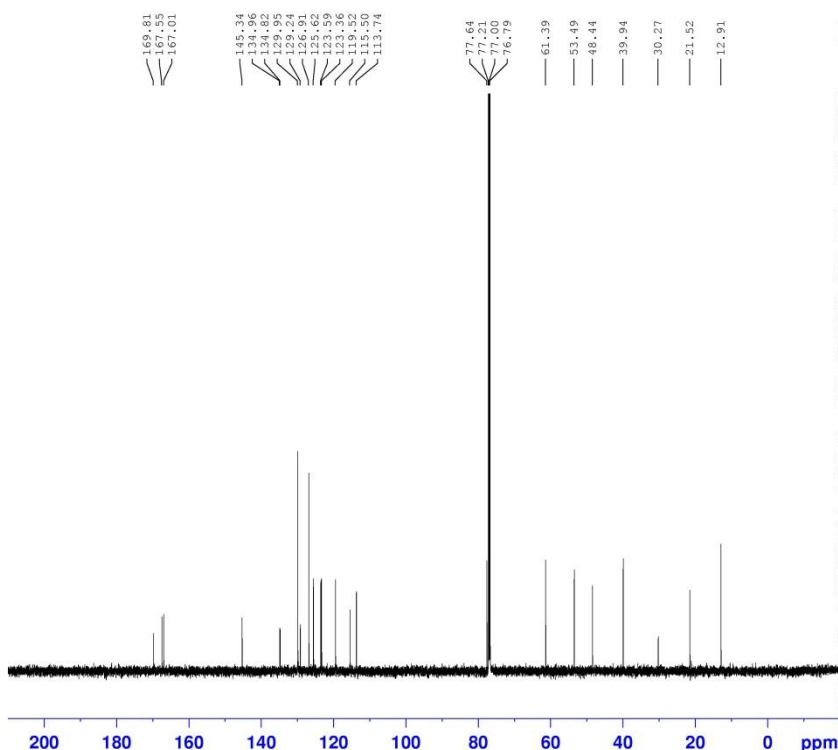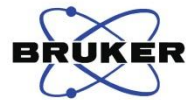

Current Data Parameters  
NAME 7KM26  
EXPNO 2  
PROCNO 1

F2 - Acquisition Parameters  
Date\_ 20120315  
Time 17.54  
INSTRUM spect  
PROBHD 5 mm PABBO BB-  
PULPROG zgpg30  
TD 65536  
SOLVENT CDCl3  
NS 172  
DS 4  
SWH 36057.691 Hz  
FIDRES 0.550197 Hz  
AQ 0.9088159 sec  
RG 203  
DW 13.867 usec  
DE 10.00 usec  
TE 295.1 K  
D1 2.00000000 sec  
D11 0.03000000 sec  
TD0 1

===== CHANNEL f1 =====  
NUC1 13C  
P1 10.50 usec  
PLW1 110.00000000 W  
SFO1 150.9178981 MHz

===== CHANNEL f2 =====  
CPDPRG2 waltz16  
NUC2 1H  
PCPD2 70.00 usec  
PLW2 20.00000000 W  
PLW12 0.80000001 W  
PLW13 0.39199999 W  
SFO2 600.1324005 MHz

F2 - Processing parameters  
SI 32768  
SF 150.9028173 MHz  
WDW EM  
SSB 0  
LB 1.00 Hz  
GB 0  
PC 1.40

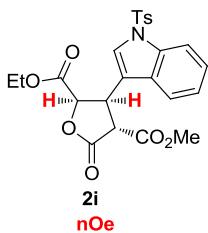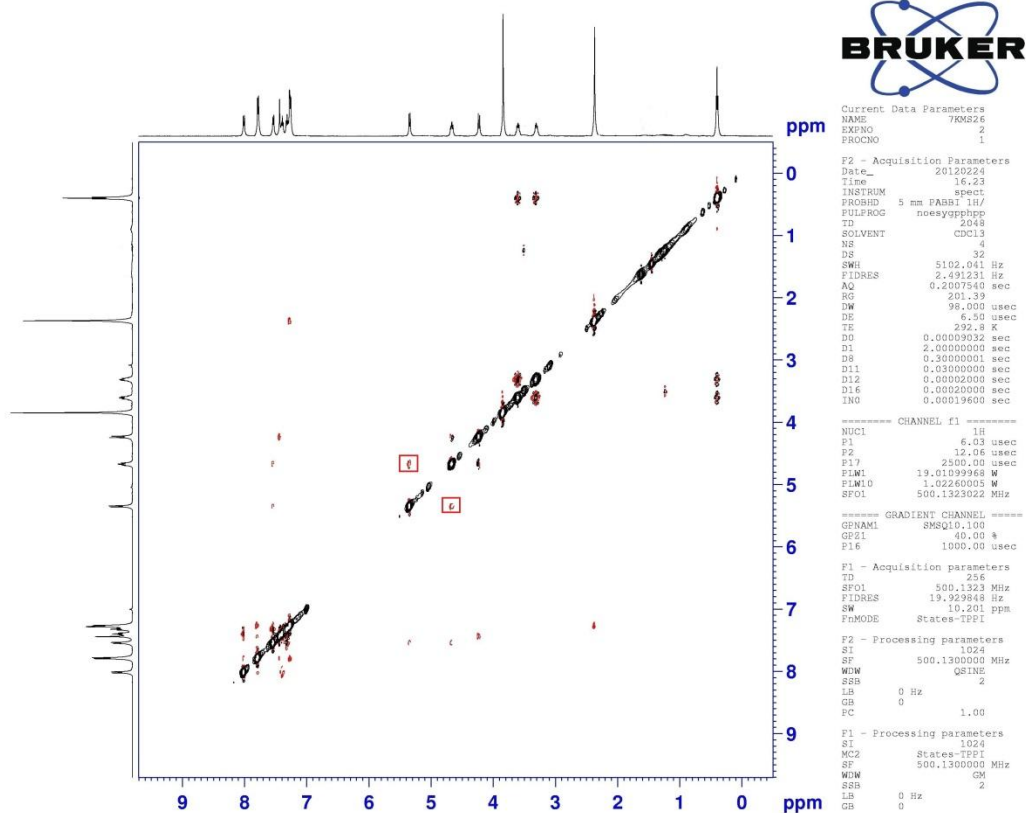

## SFC Analysis of 2i:

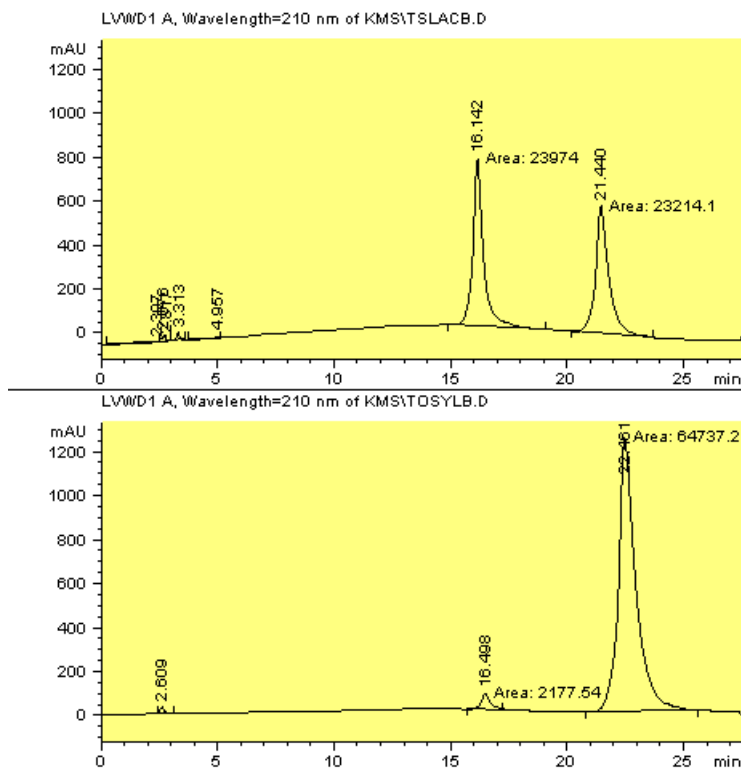

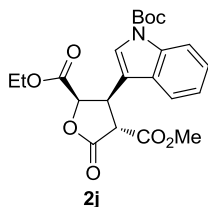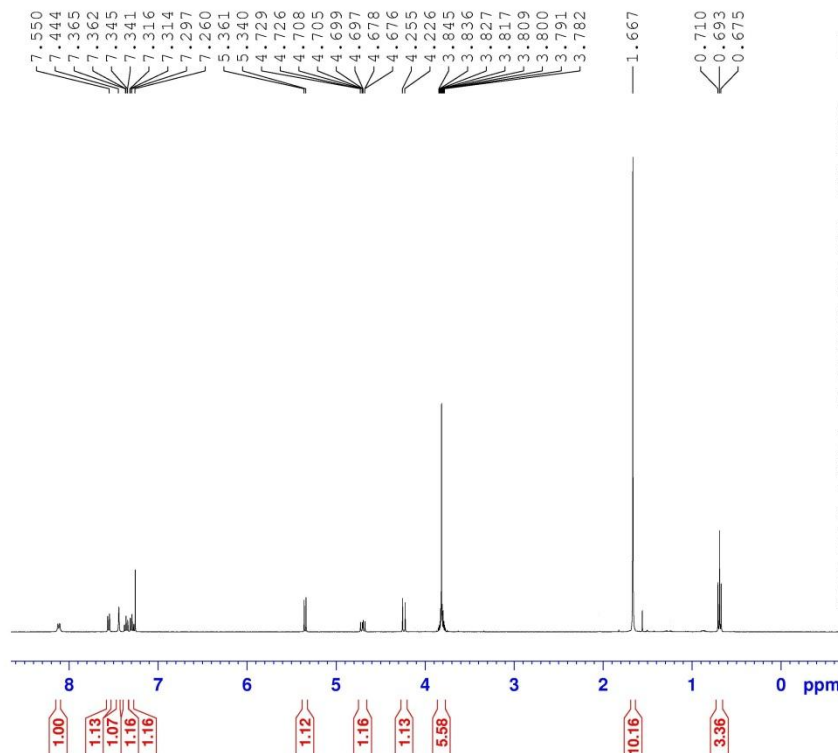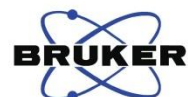

Current Data Parameters  
NAME 7KMS26  
EXPNO 1  
PROCNO 1

F2 - Acquisition Parameters  
Date\_ 20120218  
Time 12.18  
INSTRUM spect  
PROBHD 5 mm PABBO BB-  
PULPROG zg30  
TD 65536  
SOLVENT CDCl3  
NS 16  
DS 2  
SWH 8223.685 Hz  
FIDRES 0.125483 Hz  
AQ 3.9846387 sec  
RG 134.63  
DW 60.800 usec  
DE 6.50 usec  
TE 297.4 K  
D1 1.00000000 sec  
TD0 1

===== CHANNEL f1 =====  
NUC1 1H  
P1 12.38 usec  
PLW1 11.19999981 W  
SFO1 400.0924707 MHz

F2 - Processing parameters  
SI 65536  
SF 400.0900114 MHz  
WDW EM  
SSB 0  
LB 0.30 Hz  
GB 0  
PC 1.00

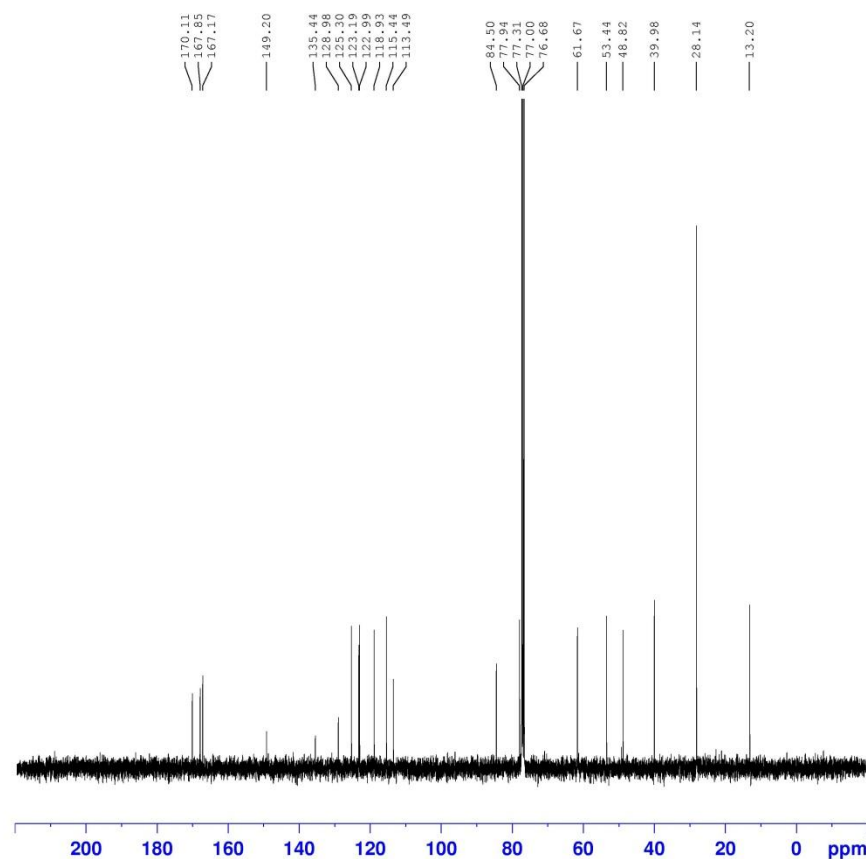

Current Data Parameters  
NAME 7KMS26  
EXPNO 2  
PROCNO 1

F2 - Acquisition Parameter  
Date\_ 20120218  
Time 12.35  
INSTRUM spect  
PROBHD 5 mm PABBO BB-  
PULPROG zgpg30  
TD 65536  
SOLVENT CDCl3  
NS 559  
DS 4  
SWH 24038.461 Hz  
FIDRES 0.366798 Hz  
AQ 1.3631988 se  
RG 200.09  
DW 20.800 us  
DE 6.50 us  
TE 298.6 K  
D1 2.00000000 se  
D11 0.03000000 se  
TD0 1

===== CHANNEL f1 =====  
NUC1 13C  
P1 7.50 us  
PLW1 61.20000076 W  
SFO1 100.6127703 MHz

===== CHANNEL f2 =====  
CPDPRG2 waltz16  
NUC2 1H  
PCPD2 80.00 us  
PLW2 11.19999981 W  
PLW12 0.26820999 W  
PLW13 0.17166001 W  
SFO2 400.0916004 MHz

F2 - Processing parameters  
SI 32768  
SF 100.6027135 MHz  
WDW EM  
SSB 0  
LB 1.00 Hz  
GB 0  
PC 1.40

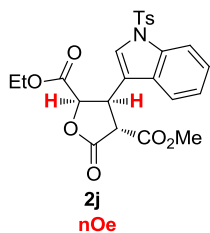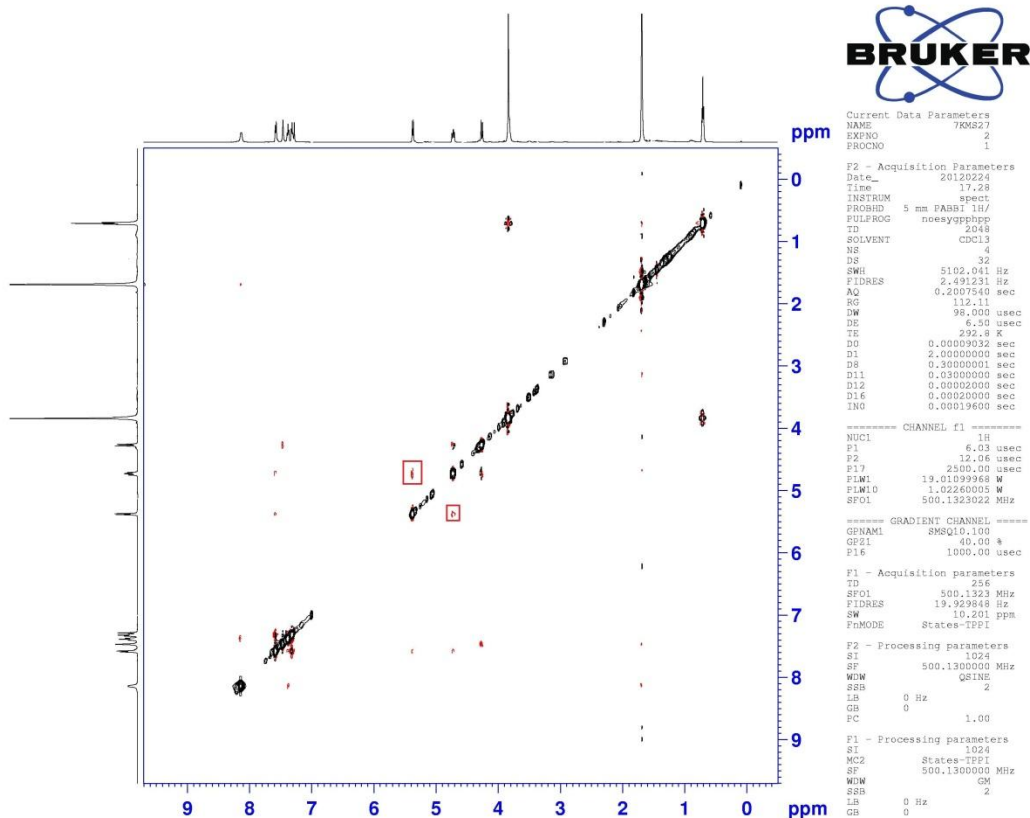

## HPLC Analysis of 2j:

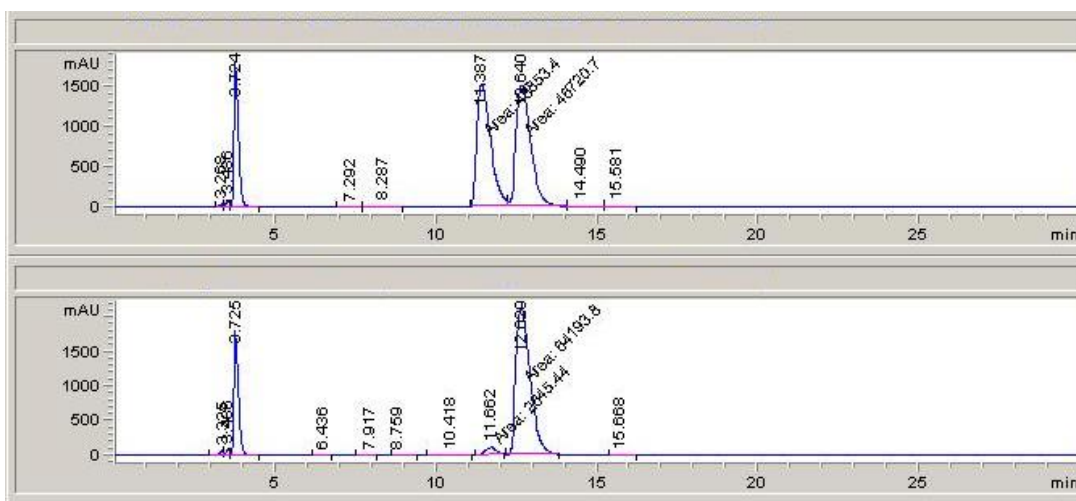

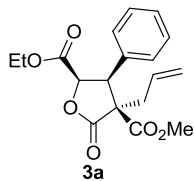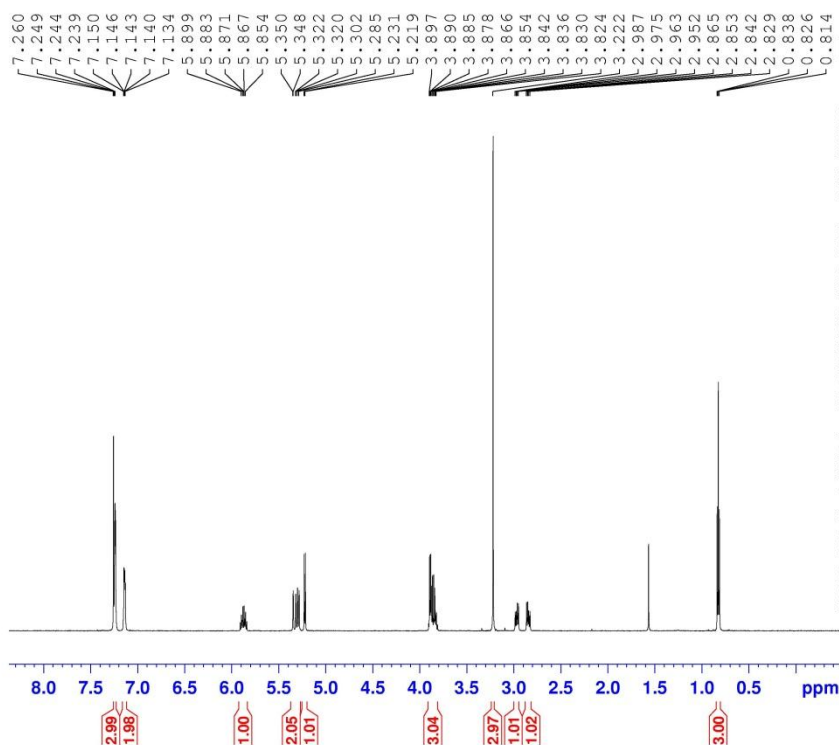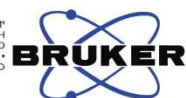

Current Data Parameters  
NAME 6KMS240  
EXPNO 3  
PROCNO 1

F2 - Acquisition Parameters  
Date\_ 20120305  
Time 14.59  
INSTRUM spect  
PROBHD 5 mm PABBO BB-  
PULPROG zg30  
TD 65536  
SOLVENT CDCl3  
NS 16  
DS 2  
SWH 12335.526 Hz  
FIDRES 0.188225 Hz  
AQ 2.6564426 sec  
RG 203  
DW 40.533 usec  
DE 6.50 usec  
TE 293.5 K  
D1 1.00000000 sec  
TD0 1

===== CHANNEL f1 =====  
NUC1 1H  
P1 13.60 usec  
PLW1 20.00000000 W  
SFO1 600.1337060 MHz

F2 - Processing parameters  
SI 65536  
SF 600.1300178 MHz  
WDW EM  
SSB 0  
LB 0.30 Hz  
GB 0  
PC 1.00

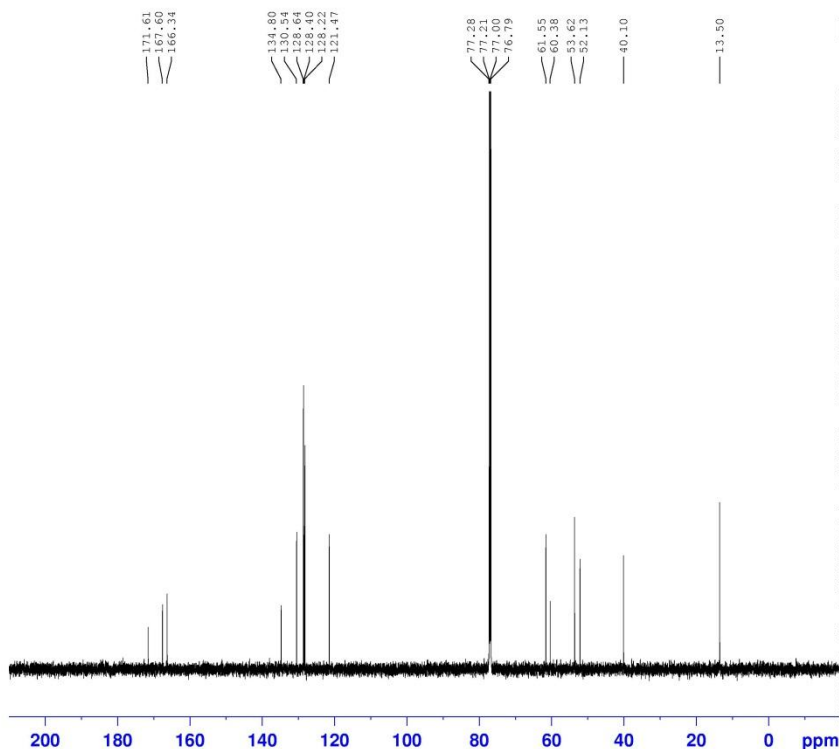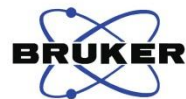

Current Data Parameters  
NAME 6KMS240  
EXPNO 4  
PROCNO 1

F2 - Acquisition Parameters  
Date\_ 20120305  
Time 15.40  
INSTRUM spect  
PROBHD 5 mm PABBO BB-  
PULPROG zgpg30  
TD 65536  
SOLVENT CDCl3  
NS 842  
DS 4  
SWH 36057.691 Hz  
FIDRES 0.550197 Hz  
AQ 0.9088159 sec  
RG 203  
DW 13.867 usec  
DE 10.00 usec  
TE 295.2 K  
D1 2.00000000 sec  
D11 0.03000000 sec  
TD0 1

===== CHANNEL f1 =====  
NUC1 13C  
P1 10.50 usec  
PLW1 110.00000000 W  
SFO1 150.9178981 MHz

===== CHANNEL f2 =====  
CPDPRG2 waltz16  
NUC2 1H  
PCPD2 70.00 usec  
PLW2 20.00000000 W  
PLW12 0.80000001 W  
PLW13 0.39199999 W  
SFO2 600.1324005 MHz

F2 - Processing parameters  
SI 32768  
SF 150.9028139 MHz  
WDW EM  
SSB 0  
LB 1.00 Hz  
GB 0  
PC 1.40

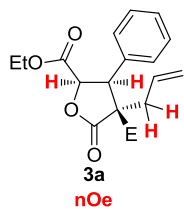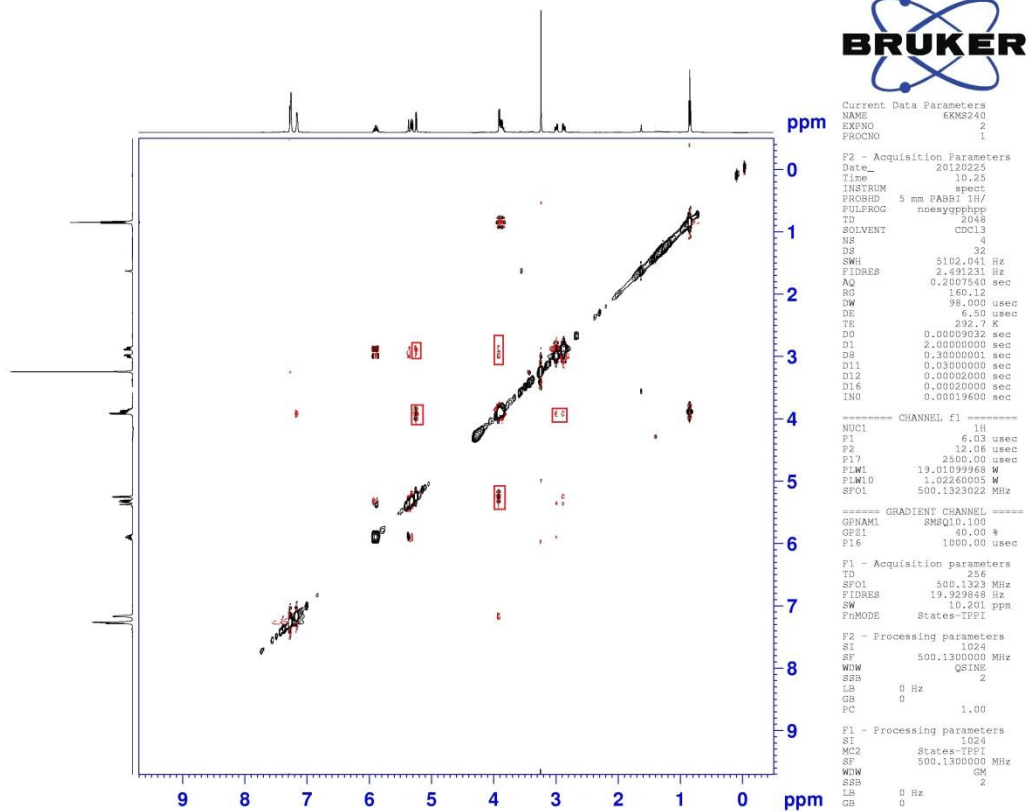

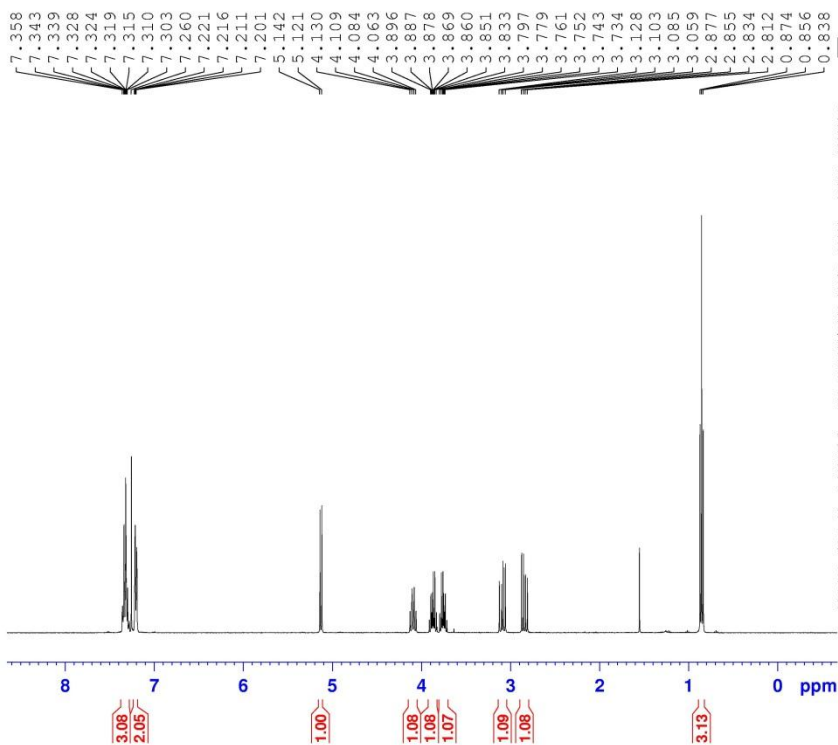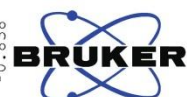

```
Current Data Parameters
NAME      Decarboxylation
EXPNO      1
PROCNO     1
```

```

F2 - Acquisition Parameters
Date_      20120213
Time       19.05
INSTRUM    spect
PULPROG    5 mm PABBO BB-
TD          zg30
FIDRES     65536
SOLVENT    CDCl3
NS          16
DS          2
SWH         8223.685 Hz
FIDRES      0.125483 Hz
AQ          3.9846387 sec
RG          178.34
DW          60.800 usec
DE          5.50 usec
TE          301.6 K
D1          1.00000000 sec
TD0         1

```

```
===== CHANNEL f1 =====
NUC1                1H
P1                  12.38 usec
PLW1                11.19999981 W
SFO1                400.0924707 MHz
```

```
F2 - Processing parameters
SI                65536
SF                400.0900112 MHz
WDW               EM
SSB               0
LB                0.30 Hz
GB               0
PC                1.00
```

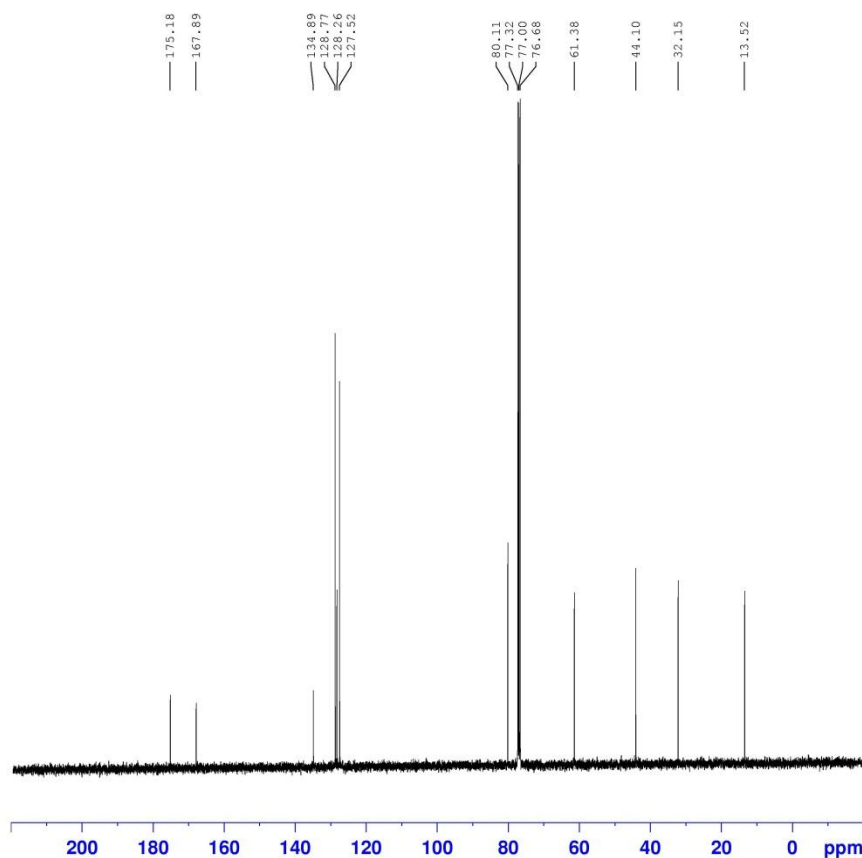

```
Current Data Parameters
NAME      Decarboxylation
EXPNO      2
PROCNO     1
```

```

F2 - Acquisition Parameters
Date_          20120213
Time           19.26
INSTRUM        spect
PROBHD         5 mm PABBO BB-
PULPROG        zgpg30
TD             65536
SOLVENT        CDC13
NS             306
DS             4
SWH            24038.461 Hz
FIDRES         0.366798 Hz
AQ            1.3631988 sec
RG            200.09
DW            20.800 us
DE            6.50 us
TE            302.6 K
D1            2.00000000 sec
D11           0.03000000 sec
TD0           1

```

```
===== CHANNEL f1 =====
NUC1                13C
P1                  7.50 us
PLW1                61.20000076 W
SFO1                100.6127703 MHz
```

```

===== CHANNEL f2 =====
CPDPRG2          waltz16
NUC2              1H
PCPD2            80.00 us
PLW2            11.19999981 W
PLW12           0.26820999 W
PLW13           0.17166001 W
SFO2            400.0916004 MHz

```

|                            |   |                 |
|----------------------------|---|-----------------|
| F2 - Processing parameters |   |                 |
| SI                         |   | 32768           |
| SF                         |   | 100.6027138 MHz |
| WDW                        |   | EM              |
| SSB                        | 0 |                 |
| LB                         |   | 1.00 Hz         |
| GB                         | 0 |                 |
| PC                         |   | 1.40            |

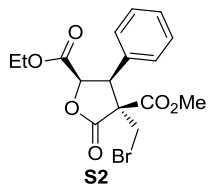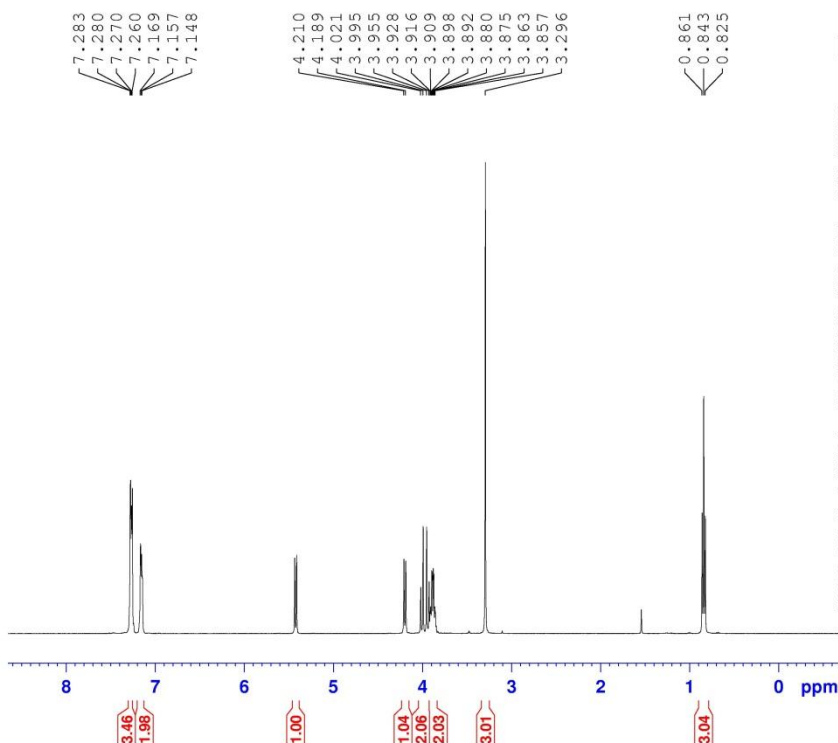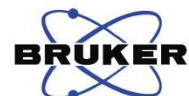

Current Data Parameters  
 NAME 7KMS36  
 EXPNO 1  
 PROCNO 1

F2 - Acquisition Parameters  
 Date\_ 20120215  
 Time 18.25  
 INSTRUM spect  
 PROBHD 5 mm PABBO BB-  
 PULPROG zg30  
 TD 65536  
 SOLVENT CDCl3  
 NS 16  
 DS 2  
 SWH 8223.685 Hz  
 FIDRES 0.125483 Hz  
 AQ 3.9846387 sec  
 RG 178.34  
 DW 60.800 usec  
 DE 6.50 usec  
 TE 301.9 K  
 D1 1.00000000 sec  
 TD0 1

===== CHANNEL f1 =====  
 NUC1 1H  
 P1 12.38 usec  
 PLW1 11.19999981 W  
 SFO1 400.0924707 MHz

F2 - Processing parameters  
 SI 65536  
 SF 400.0900111 MHz  
 WDW EM  
 SSB 0  
 LB 0.30 Hz  
 GB 0  
 PC 1.00

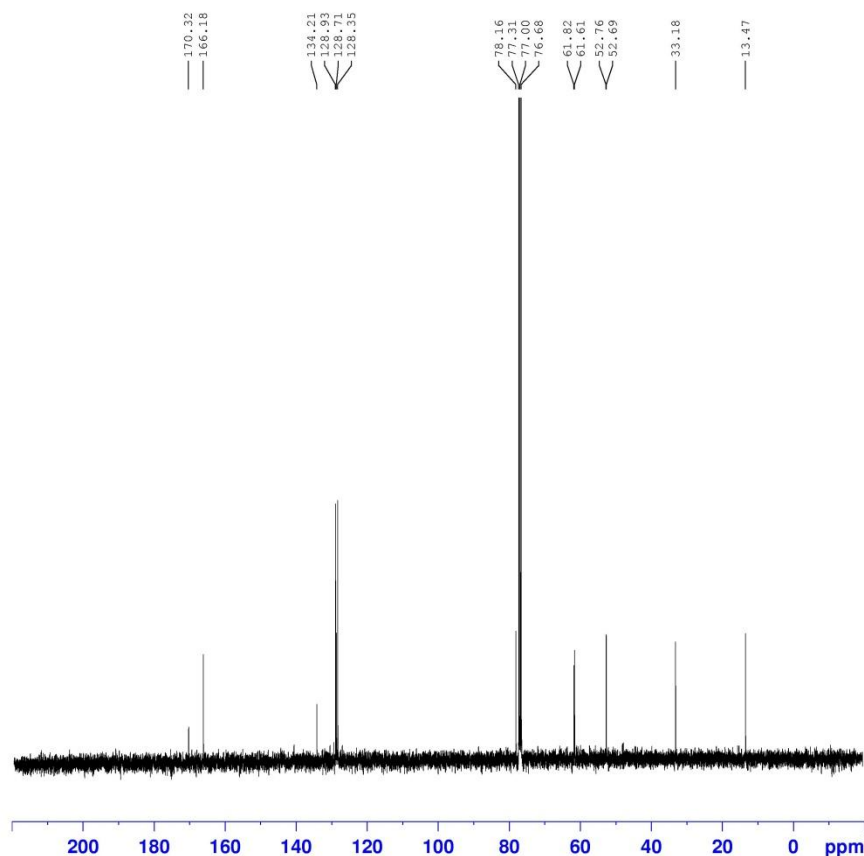

Current Data Parameters  
 NAME 7KMS36  
 EXPNO 3  
 PROCNO 1

F2 - Acquisition Parameter  
 Date\_ 20120214  
 Time 19.41  
 INSTRUM spect  
 PROBHD 5 mm PABBO BB-  
 PULPROG zgpg30  
 TD 65536  
 SOLVENT CDCl3  
 NS 231  
 DS 4  
 SWH 24038.461 Hz  
 FIDRES 0.366798 Hz  
 AQ 1.3631988 se  
 RG 200.09  
 DW 20.800 us  
 DE 6.50 us  
 TE 302.9 K  
 D1 2.00000000 se  
 D11 0.03000000 se  
 TD0 1

===== CHANNEL f1 =====  
 NUC1 13C  
 P1 7.50 us  
 PLW1 61.20000076 W  
 SFO1 100.6127703 MHz

===== CHANNEL f2 =====  
 CPDPRG2 waltz16  
 NUC2 1H  
 PCPD2 80.00 us  
 PLW2 11.19999981 W  
 PLW12 0.26820999 W  
 PLW13 0.17166001 W  
 SFO2 400.0916004 MHz

F2 - Processing parameters  
 SI 32768  
 SF 100.6027127 MHz  
 WDW EM  
 SSB 0  
 LB 1.00 Hz  
 GB 0  
 PC 1.40

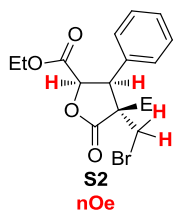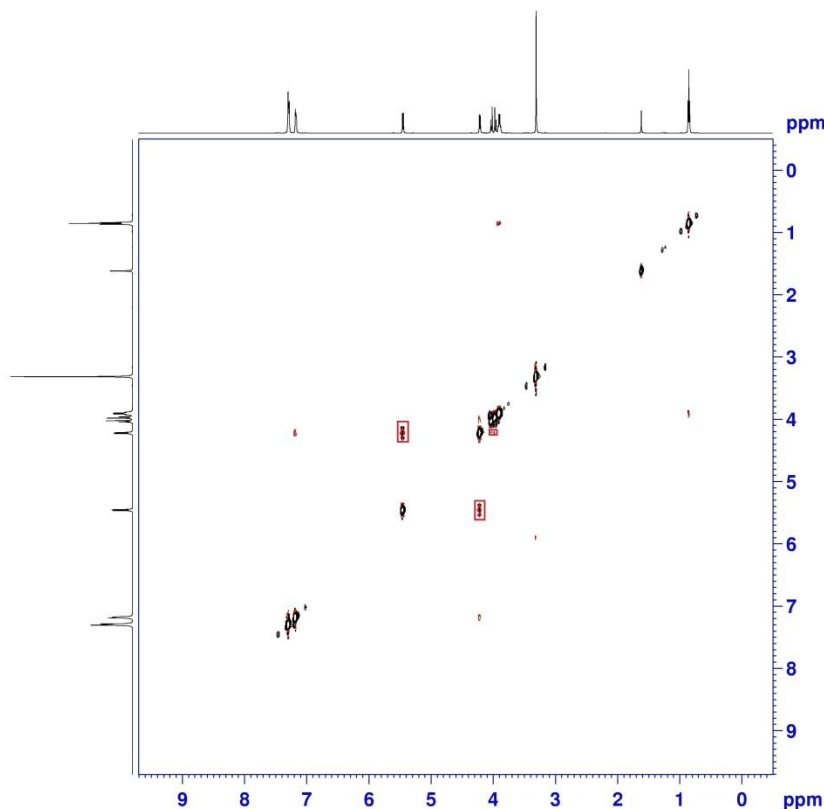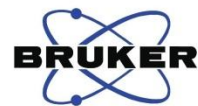

Current Data Parameters  
NAME 7KXG36  
EXPNO 2  
PROCNO 1

F2 - Acquisition Parameters  
Date\_ 20120224  
Time 12:31  
INSTRUM spect  
PROBHD 5 mm PABBI 1H/  
PULPROG noesypphpgp  
TD 2048  
SOLVENT CDCl3  
NS 4  
DS 32  
SWH 5102.041 Hz  
FIDRES 2.491231 Hz  
AQ 0.2007540 sec  
RG 201.39  
DW 98.000 usec  
DE 6.50 usec  
TE 290.2 K  
D0 0.00000032 sec  
D1 2.00000000 sec  
D8 0.30000001 sec  
D11 0.03000000 sec  
D12 0.00002000 sec  
D16 0.00020000 sec  
IN0 0.00019600 sec

===== CHANNEL f1 =====  
NUC1 1H  
P1 6.03 usec  
P2 12.06 usec  
P17 2500.00 usec  
PLM1 19.01099968 W  
PLM10 1.02260005 W  
SFO1 500.1323022 MHz

===== GRADIENT CHANNEL =====  
GENAM1 SMSQ10.100  
GFG1 40.00 %  
P16 1000.00 usec

F1 - Acquisition parameters  
TD 256  
SFO1 500.1323 MHz  
FIDRES 19.929848 Hz  
SW 10.201 ppm  
FMODE States-TPPI

F2 - Processing parameters  
SI 1024  
SF 500.1300000 MHz  
WDW QSINE  
SSB 2  
LB 0 Hz  
GB 0  
PC 1.00

F1 - Processing parameters  
SI 1024  
MC2 States-TPPI  
SF 500.1300000 MHz  
WDW GM  
SSB 2  
LB 0 Hz  
GB 0

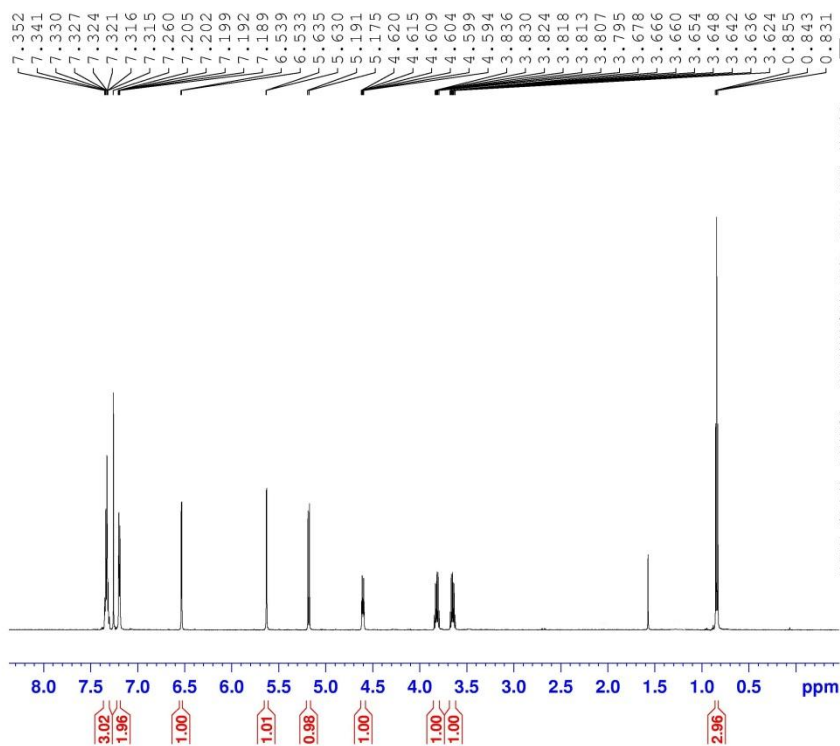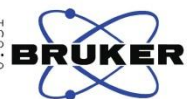

```
Current Data Parameters
NAME      Dehalodecarboxylation
EXPNO      1
PROCNO     1
```

```

F2 - Acquisition Parameters
Date_      20120213
Time       15.37
INSTRUM    spect
PROBH      5 mm PABBO B5
PULPROG    zg30
TD          65536
SOLVENT    CDCl3
NS          16
DS          2
SWH         12335.526 Hz
FIDRES      0.188225 Hz
AQ          2.6564426 sec
RG          203
DE          40.53 usec
DW          6.50 usec
TE          293.1 K
D1          1.00000000 sec
TDO         1

```

```

----- CHANNEL f1 -----
NUC1              1H
P1                13.60 usec
PLW1             20.00000000 W
SFO1             600.1337060 MHz

```

```

F2 - Processing parameters
SI                65536
SF                600.1300180 MHz
WDW               EM
SSB               0
LB                0.30 Hz
GB               0
PC                1.00

```

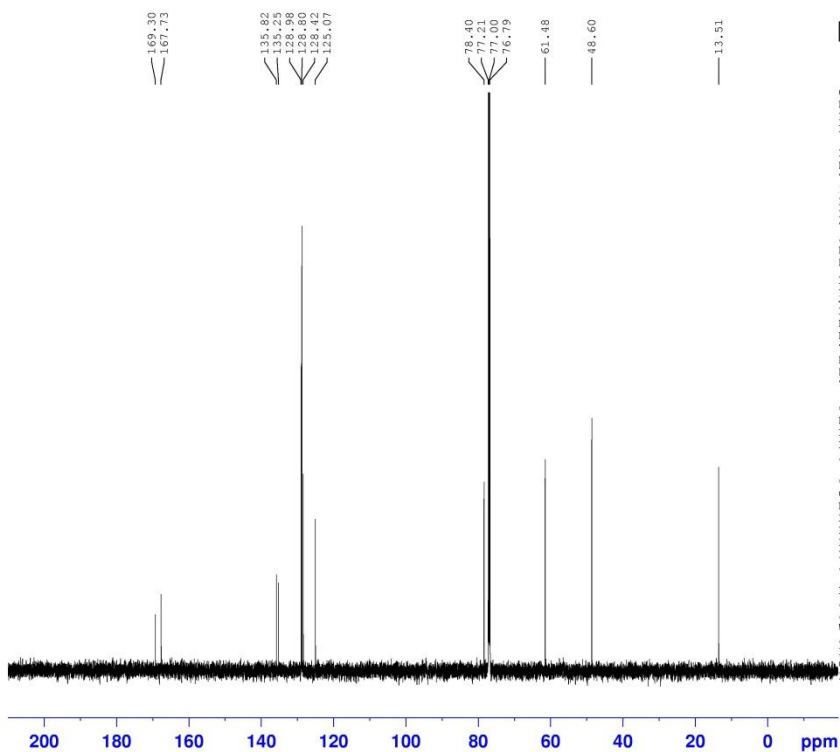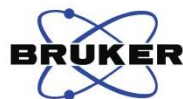

```
Current Data Parameters
NAME      Dehalodecarboxylation
EXPNO      2
PROCNO     1
```

```

F2 - Acquisition Parameters
Time_                20120213
Date_                16.00
INSTRUM              spect
PROBHD      5 mm PABBO BB-
PULPROG              zgpg30
TD                   65536
SOLVENT              CDC13
NS                   510
DS                   4
SWH                  36057.691 Hz
FIDRES              0.550197 Hz
AQ                   0.908815 sec
RG                   203
DW                   13.867 use
DE                   10.00 use
TE                   294.6 K
D1                   2.00000000 sec
D11                  0.03000000 sec
TD0                   1

```

```
===== CHANNEL f1 =====
NUC1                13C
P1                  10.50 usec
PLW1                110.00000000 W
SFO1                150.9178981 MHz
```

```

    CHANNEL f2
CPDPRG2          waltz16
NUC2             1H
PCPD2           70.00 usec
PLW2            20.00000000 W
PLW12           0.80000001 W
PLW13           0.39199999 W
SFO2            600.1324005 MHz

```

```

F2 - Processing parameters
SI                      32768
SF                      150.9028140 MHz
WDW                      EM
SSB      0
LB                      1.00 Hz
GB      0
PC                      1.40

```

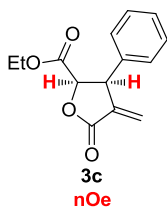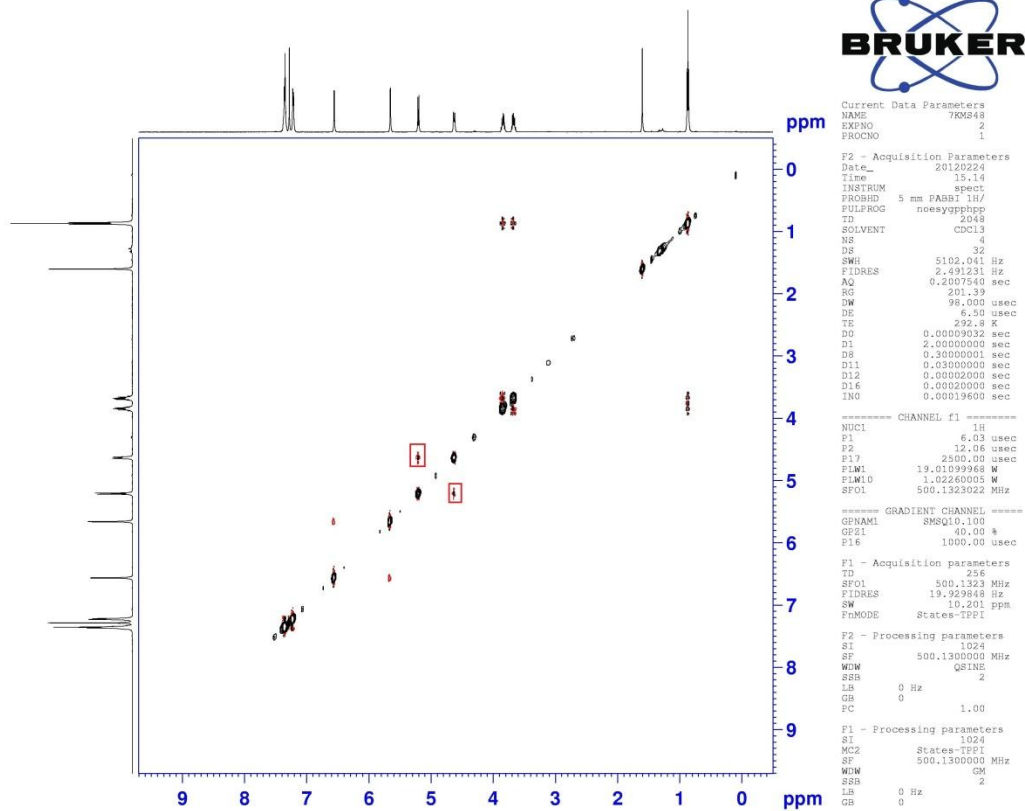

Supplement: Supplementary file 1 [file 4169893]
